# Supplementary material for: Iridium-catalyzed orthogonal and regioselective synthesis of triazole disulfides in aqueous media under mild conditions
Source: Royal Society of Chemistry journal article supplement (doi:10.1039/d0gc00555j), 2020-01-01

## Supporting Information

# Iridium-Catalyzed Orthogonal and Regioselective Synthesis of Triazole Disulfides in Aqueous Media under Mild Conditions

Ming Li,<sup>†</sup> Nan Zheng,<sup>†</sup> Junhao Li,<sup>†</sup> Yubin Zheng,<sup>†</sup> Wangze Song,<sup>†,\*</sup>

<sup>†</sup> State Key Laboratory of Fine Chemicals, School of Chemical Engineering, Dalian  
University of Technology, Dalian, 116024, P. R. China

\* wzsong@dlut.edu.cn

|                                                                                                      |    |
|------------------------------------------------------------------------------------------------------|----|
| 1 General Remarks.....                                                                               | 2  |
| 2 General procedures for the preparation of substrates.....                                          | 2  |
| 3 Representative procedures for the synthesis of fully substituted triazole disulfides in water..... | 3  |
| 4 Procedures for the orthogonal experiment in water.....                                             | 3  |
| 5 Procedures for the deprotection reaction.....                                                      | 4  |
| 6 Procedures for the reduction reactions.....                                                        | 4  |
| 7 Procedures for the synthesis of nano particle.....                                                 | 5  |
| 8 Proposed mechanism for the aqueous reaction.....                                                   | 6  |
| 9 Characterization data of products.....                                                             | 6  |
| 10 References.....                                                                                   | 15 |
| 11 NMR Spectra.....                                                                                  | 15 |

## 1 General Remarks

Unless otherwise noted, all commercially available reagents and solvents were used without further purification. Thin layer chromatography was performed using precoated silica gel plates and visualized with UV light at 254 nm. Flash column chromatography was performed with silica gel (40-60  $\mu\text{m}$ ).  $^1\text{H}$  and  $^{13}\text{C}$  nuclear magnetic resonance spectra (NMR) were obtained on a Bruker Avance II 400 MHz or Bruker Avance III 500 MHz recorded in ppm ( $\delta$ ) downfield of TMS ( $\delta = 0$ ) in  $\text{CDCl}_3$  unless noted otherwise. Signal splitting patterns were described as singlet (s), doublet (d), triplet(t), quartet (q), quintet (quint), or multiplet (m), with coupling constants ( $J$ ) in hertz (Hz). High resolution mass spectra (HRMS) were performed by an Agilent apparatus (TOF mass analyzer type) on an Electron Spray Injection (ESI) mass spectrometer and Waters MALDI micro MX (MALDI-TOF mass analyzer type) mass spectrometer. The particle sizes of polymeric nano particles were detected by dynamic light scattering (DLS) on a Malvern Zetasizer Nano ZS90 (Malvern, UK). All the sizes were presented in terms of intensity diameter. Scanning electron microscopy (SEM) was performed on NOVA NanoSEM 450 (FEI). Melting points were determined by an XP-4 melting point apparatus.

## 2 General procedures for the preparation of substrates

All internal disulfanyl alkynes **1** were prepared according to the literature procedure.<sup>S1</sup>

The azides **2m-2r** were prepared according to the literature procedure.<sup>S2</sup>

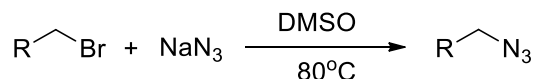

To a stirred solution of  $\text{NaN}_3$  (71.5 mg, 1.1 mmol) in DMSO (2 mL) was added bromoalkane (1 mmol). The reaction mixture was stirred at  $80^\circ\text{C}$  overnight. Then the reaction mixture was cooled to room temperature and diluted with water (5 mL). The mixture was extracted with ether ( $3 \times 5$  mL) and washed by brine, dried over  $\text{Na}_2\text{SO}_4$  and concentrated under vacuum to give the products in quantitative yields. It was used directly without further purification.

Products **3a**, **3b** are known compounds.<sup>S3</sup>

### 3 Representative procedures for the synthesis of fully substituted triazole disulfides in water

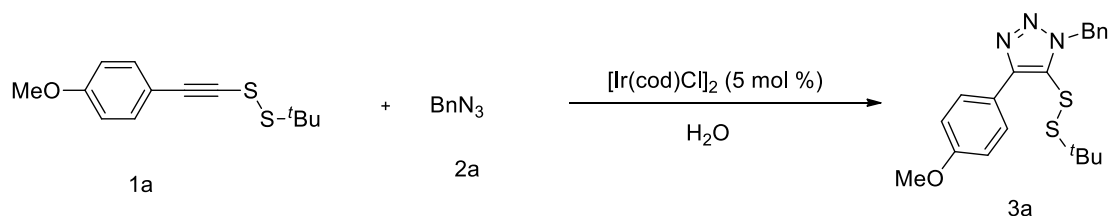

To a vial containing 1-(*tert*-butyl)-2-((4-methoxyphenyl) ethynyl) disulfane **1a** (25.2 mg, 0.1 mmol, 1 equiv) in  $\text{H}_2\text{O}$  (1 mL) and  $[\text{Ir}(\text{cod})\text{Cl}]_2$  (3.4 mg, 5 mol %) was added  $\text{BnN}_3$  (26.6 mg, 0.2 mmol, 2 equiv). The vial was ultrasonic for 5 min (120 W, 40 KHz). Then the mixture was stirred at rt for 12 h. DCM (2 ml) was added to the reaction mixture. Organic layer was separated and aqueous layer was extracted with DCM for three times. The extracts were dried over anhydrous sodium sulfate, and then solvent was evaporated under reduced pressure. The residue was purified with flash column chromatography (20% EtOAc in petroleum ether) to give the pure product **3a** (29.6 mg, 77%) as a yellow oil.

### 4 Procedures for the orthogonal experiment in water

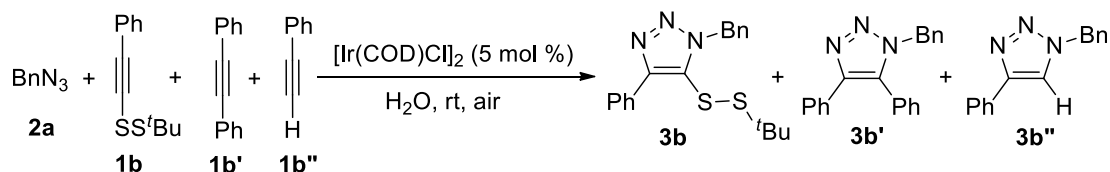

To a vial containing 1-(*tert*-butyl)-2-((4-phenyl) ethynyl) disulfane **1b** (22.2 mg, 0.1 mmol, 1 equiv), 1,2-diphenylethyne **1b'** (17.8 mg, 0.1 mmol, 1 equiv) and ethynylbenzene **1b''** (10.2 mg, 0.1 mmol, 1 equiv) in  $\text{H}_2\text{O}$  (1 mL),  $[\text{Ir}(\text{cod})\text{Cl}]_2$  (3.4 mg, 5 mol %) and  $\text{BnN}_3$  (26.6 mg, 0.2 mmol, 2 equiv) was added. The vial was ultrasonic for 5 min. Then the mixture was stirred at rt for 24 h. DCM (2 ml) was added to the reaction mixture. Organic layer was separated and aqueous layer was extracted with DCM for three times. The extracts were dried over anhydrous sodium sulfate, and then solvent was evaporated under reduced pressure. The residue was purified with flash column chromatography (20% EtOAc in petroleum ether) to give the pure product **3b** (25.6 mg, 72%) as a yellow oil. No **3b'** and **3b''** were observed or

isolated.

Besides above example, 1-(*tert*-butyl)-2-((4-(*p*-methoxyphenyl) ethynyl) disulfane **1a** (25.2 mg, 0.1 mmol, 1 equiv), 1,2-bis(4-methoxyphenyl)ethyne **1a'** (23.8 mg, 0.1 mmol, 1 equiv) and 1-ethynyl-4-methoxybenzene **1a''** (13.2 mg, 0.1 mmol, 1 equiv) were used as the substrates in the same conditions. The similar results were acquired as follows:

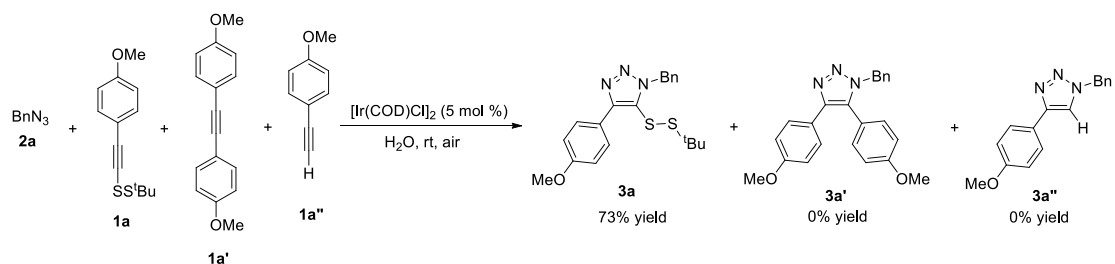

## 5 Procedures for the deprotection reaction

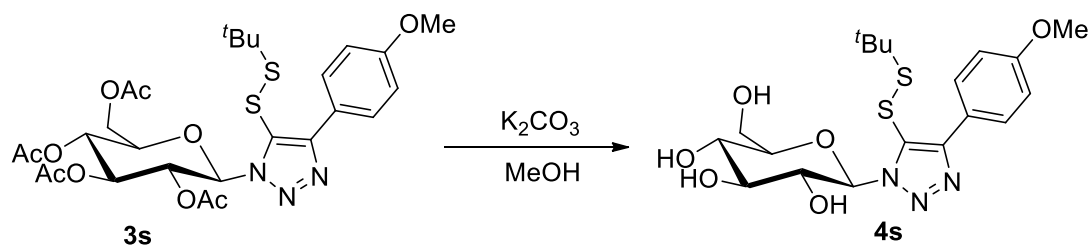

To a vial containing **3s** (31.3 mg, 0.05 mmol, 1 equiv) in MeOH (1 mL) was added K<sub>2</sub>CO<sub>3</sub> (4.1mg, 0.03mmol, 0.6 equiv). Then the mixture was stirred at rt for 1h. Diluted with 5 mL petroleum ether, filtered through celite, and then the solvent was evaporated under reduced pressure. Purified with flash column chromatography (20% MeOH in DCM) to give the pure product **4s** (22.6 mg, 99%) as a yellow oil.<sup>S4</sup>

## 6 Procedures for the reduction reactions

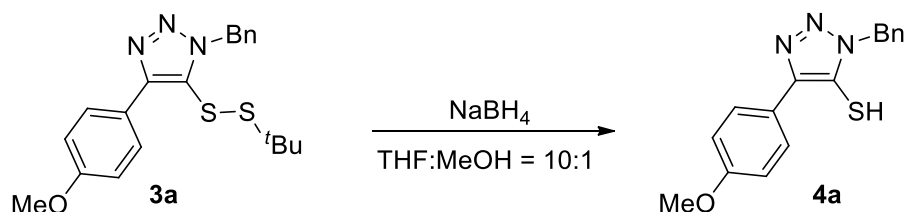

To the mixture of **3a** (38.5 mg, 0.1 mmol) and NaBH<sub>4</sub> (9.5 mg, 0.25 mmol) in THF

(400  $\mu$ L), MeOH (40  $\mu$ L) was added slowly. After reflux for 4 h, the mixture was cooled to room temperature. 1 M HCl (200  $\mu$ L) was added to the reaction mixture. After stir for 30 min, then 6 M HCl (300  $\mu$ L) was added to the reaction mixture. Organic layer was separated and aqueous layer was extracted with DCM for three times. The extracts were dried over anhydrous sodium sulfate, and then solvent was evaporated under reduced pressure. Purified with flash column chromatography (50% EtOAc in petroleum ether) to give the pure product **4a** (16.1 mg, 54%) as a yellow oil.<sup>S5</sup>

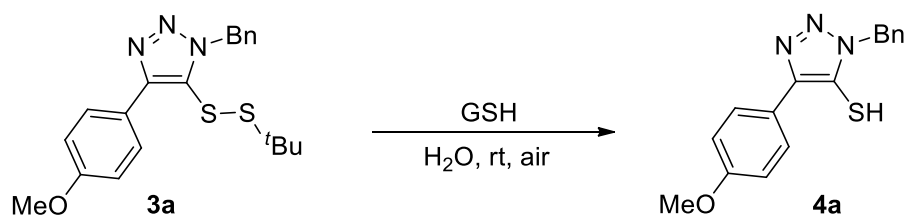

To the mixture of **3a** (38.5 mg, 0.1 mmol) in H<sub>2</sub>O (1 mL) was added GSH (122 mg, 0.2 mmol, 2 equiv). After stirring for 4 h, DCM (2 mL) was added to the reaction mixture. Organic layer was separated and aqueous layer was extracted with DCM for three times. The extracts were dried over anhydrous sodium sulfate, and then solvent was evaporated under reduced pressure. Purified with flash column chromatography (50% EtOAc in petroleum ether) to give the pure product **4a** (15.1 mg, 51%) as a yellow oil.

## 7 Procedures for the synthesis of nano particle

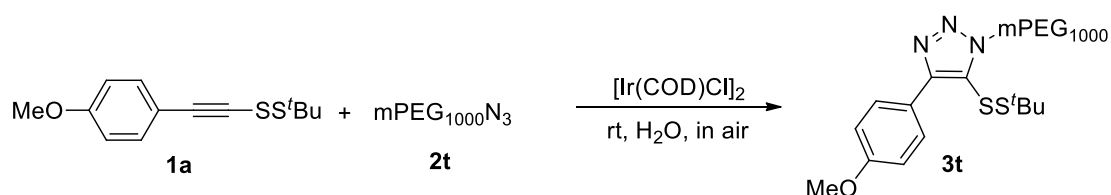

To a vial containing 1-(*tert*-butyl)-2-((4-methoxyphenyl) ethynyl) disulfane **1a** (25.2 mg, 0.1 mmol, 1 equiv) in H<sub>2</sub>O (1 mL) and [Ir(cod)Cl]<sub>2</sub> (3.4 mg, 5 mol%) was added mPEG<sub>1000</sub>-N<sub>3</sub> (20 mg, 0.2 mmol, 2 equiv). Then the mixture was stirred overnight. The product was precipitated using hexane and collected by centrifugation. Then the product was dried under vacuum for 24 h and **3t** was acquired (93.1 mg, 65% yield).

## 8 Proposed mechanism for the aqueous reaction

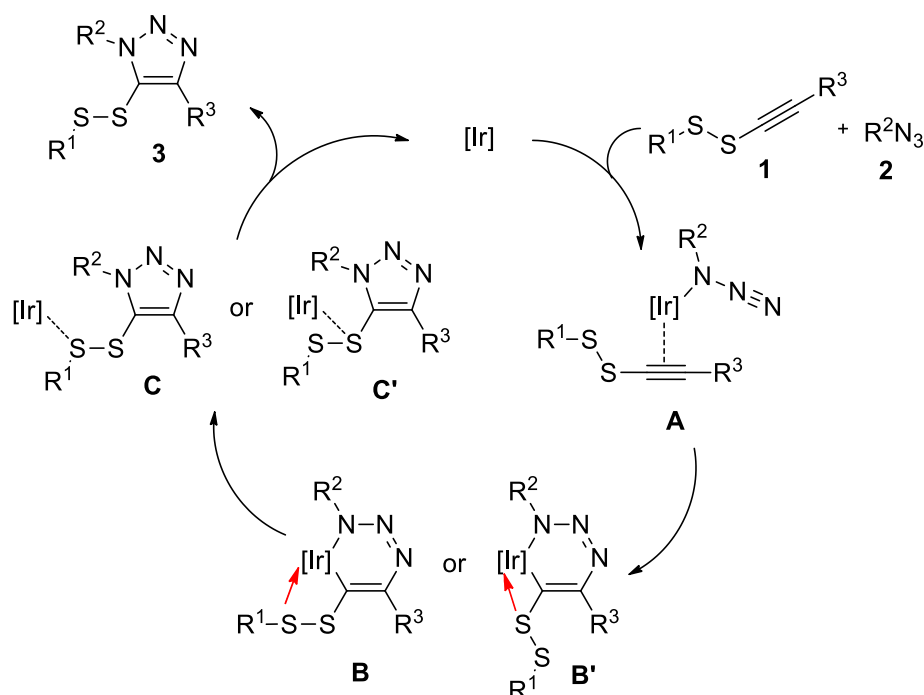

We proposed the mechanism based on the results we acquired. The cycloaddition is initiated by the combination of  $\pi$ -acidic Ir with internal disulfanyl alkyne (**1**) and azide (**2**) to give intermediate **A**. The azide coordinates with Ir by the internal nitrogen atom in intermediate **A**.<sup>S6</sup> Oxidative cyclization yields metallacycle **B** or **B'**, in which the sulfur strongly coordinates to the Ir in the form of three-membered (**B'**) or four-membered ring (**B**), stabilizing the system and providing the high 1,5-regioselectivity. We considered that the transition state of four-membered ring (**B**) could be more stable and favorable than three-membered ring (**B'**) due to lower ring strain.<sup>S7-S8</sup> None of the other groups on the internal alkyne can coordinate to the iridium. Then reductive elimination of intermediate **B** or **B'** generates intermediate **C** or **C'**. Desired fully substituted triazole disulfide **3** could be acquired from **C** or **C'** with excellent 1,5-regioselectivity.

## 9 Characterization data of products

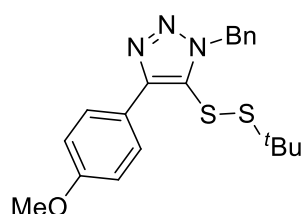

**1-benzyl-5-(*tert*-butyldisulfanyl)-4-(4-methoxyphenyl)-1*H*-1,2,3-triazole (3a)**

29.6 mg, 77% yield, yellow oil. <sup>1</sup>H NMR (400 MHz, CDCl<sub>3</sub>, TMS): δ 7.97 (d, *J* = 8.0 Hz, 2H), 7.41-7.30(m, 5H), 7.01 (d, *J* = 8.0 Hz, 2H), 5.77 (s, 2H), 3.88 (s, 3H), 1.12 (s, 9H).

Compound **3a** is known compound, and the proton spectrum is fully consistent with literature reported.<sup>S3</sup>

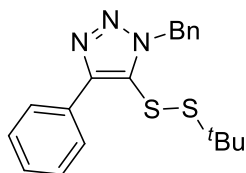

**1-benzyl-5-(*tert*-butyldisulfanyl)-4-phenyl-1*H*-1,2,3-triazole (3b)**

26.3 mg, 74% yield, yellow oil. <sup>1</sup>H NMR (400 MHz, CDCl<sub>3</sub>, TMS): δ 8.05-8.00 (m, 2H), 7.52-7.46 (m, 2H), 7.44-7.41 (m, 1H), 7.40-7.34 (m, 5H), 5.79 (s, 2H), 1.10 (s, 9H).

Compound **3b** is known compound, and the proton spectrum is fully consistent with literature reported.<sup>S3</sup>

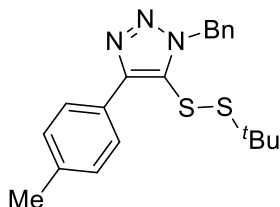

**1-benzyl-5-(*tert*-butyldisulfanyl)-4-(*p*-tolyl)-1*H*-1,2,3-triazole (3c)**

30.3 mg, 82% yield, yellow oil. <sup>1</sup>H NMR (400 MHz, CDCl<sub>3</sub>, TMS): δ 7.93 (d, *J* = 8.0 Hz, 2H), 7.41-7.32 (m, 5H), 7.29 (d, *J* = 8.0 Hz, 2H), 5.78 (s, 2H), 2.43 (s, 3H), 1.11 (s, 9H). <sup>13</sup>C NMR (100 MHz, CDCl<sub>3</sub>): δ 149.4, 138.5, 134.9, 129.2, 128.8, 128.3, 128.1, 127.7, 127.6, 127.1, 52.6, 49.4, 29.7, 21.4. HRMS (ESI) *m/z* calcd for C<sub>20</sub>H<sub>23</sub>N<sub>3</sub>S<sub>2</sub> (M+Na)<sup>+</sup> 392.1226, found 392.1227.

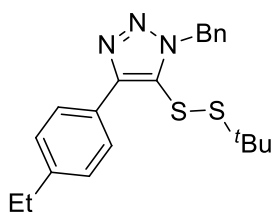

**1-benzyl-5-(*tert*-butyldisulfanyl)-4-(4-ethylphenyl)-1*H*-1,2,3-triazole (3d)**

27.2 mg, 71% yield, brown oil. <sup>1</sup>H NMR (400 MHz, CDCl<sub>3</sub>, TMS) δ 7.95 (d, *J* = 8.2 Hz, 2H), 7.41-7.35 (m, 5H), 7.31 (d, *J* = 8.2 Hz, 2H), 5.78 (s, 2H), 2.73 (q, *J* = 7.6 Hz, 2H), 1.29 (t, *J* = 7.6 Hz, 3H), 1.11 (s, 9H). <sup>13</sup>C NMR (100 MHz, CDCl<sub>3</sub>): δ 149.4, 144.8, 134.9, 128.8, 128.3, 128.1, 128.0, 127.8, 127.8, 127.1, 52.6, 49.4, 29.7, 28.7, 15.4. HRMS (ESI) *m/z* calcd for C<sub>21</sub>H<sub>25</sub>N<sub>3</sub>S<sub>2</sub> (M+Na)<sup>+</sup> 406.1382, found 406.1389.

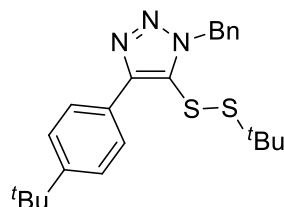**1-benzyl-4-(4-(*tert*-butyl)phenyl)-5-(*tert*-butyldisulfanyl)-1*H*-1,2,3-triazole (3e)**

25.5 mg, 62% yield, brown solid, mp = 53-57°C. <sup>1</sup>H NMR (400 MHz, CDCl<sub>3</sub>, TMS): δ 7.95 (d, *J* = 8.0 Hz, 2H), 7.47 (d, *J* = 8.0 Hz, 2H), 7.40-7.29 (m, 5H), 5.76 (s, 2H), 1.35 (s, 9H), 1.09 (s, 9H). <sup>13</sup>C NMR (100 MHz, CDCl<sub>3</sub>): δ 151.7, 149.3, 134.9, 128.8, 128.3, 128.0, 127.5, 127.2, 125.4, 52.6, 49.4, 34.7, 31.3, 29.7. HRMS (ESI) *m/z* calcd for C<sub>23</sub>H<sub>29</sub>N<sub>3</sub>S<sub>2</sub> (M+H)<sup>+</sup> 412.1876, found 412.1877.

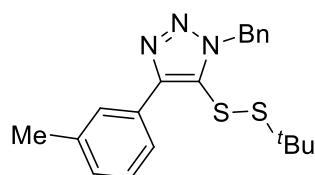**1-benzyl-5-(*tert*-butyldisulfanyl)-4-(*m*-tolyl)-1*H*-1,2,3-triazole (3f)**

27.3 mg, 74% yield, yellow oil. <sup>1</sup>H NMR (400 MHz, CDCl<sub>3</sub>, TMS) δ 7.89 (s, 1H), 7.84 (d, *J* = 7.7 Hz, 1H), 7.39-7.34 (m, 6H), 7.23 (d, *J* = 7.6 Hz, 1H), 5.78 (s, 2H), 2.44 (s, 3H), 1.11 (s, 9H). <sup>13</sup>C NMR (100 MHz, CDCl<sub>3</sub>): δ 149.4, 138.2, 134.8, 130.3, 129.4, 128.8, 128.5, 128.4, 128.3, 128.1, 127.5, 125.0, 52.6, 49.4, 29.6, 21.5. HRMS (ESI) *m/z* calcd for C<sub>20</sub>H<sub>23</sub>N<sub>3</sub>S<sub>2</sub> (M+Na)<sup>+</sup> 392.1226, found 392.1226.

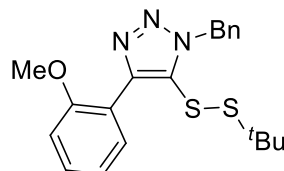**1-benzyl-5-(*tert*-butyldisulfanyl)-4-(2-methoxyphenyl)-1*H*-1,2,3-triazole (3g)**

25.4 mg, 66% yield, colorless oil. <sup>1</sup>H NMR (400 MHz, CDCl<sub>3</sub>, TMS): δ 7.53-7.48 (m, 1H), 7.47-7.41 (m, 1H), 7.41-7.32 (m, 5H), 7.09-6.99 (m, 2H), 5.77 (s, 2H), 3.81 (s, 3H), 1.01 (s, 9H). <sup>13</sup>C NMR (100 MHz, CDCl<sub>3</sub>): δ 156.9, 147.1, 135.0, 131.4, 130.4,



130.0, 128.7, 128.2, 128.1, 120.7, 119.8, 111.0, 55.4, 52.6, 48.8, 29.4. HRMS (ESI)  $m/z$  calcd for  $C_{20}H_{23}N_3OS_2$  ( $M+Na$ )<sup>+</sup> 408.1175, found 408.1176.

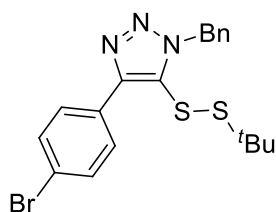

**1-benzyl-4-(4-bromophenyl)-5-(tert-butyldisulfanyl)-1H-1,2,3-triazole (3h)**

30.7 mg, 71% yield, brown oil. <sup>1</sup>H NMR (400 MHz, CDCl<sub>3</sub>, TMS): δ 7.93 (d,  $J$  = 7.4 Hz, 2H), 7.61 (d,  $J$  = 7.4 Hz, 2H), 7.41-7.32 (m, 5H), 5.77 (s, 2H), 1.11 (s, 9H). <sup>13</sup>C NMR (125 MHz, CDCl<sub>3</sub>): δ 148.1, 134.6, 131.7, 129.4, 129.3, 128.8, 128.4, 128.1, 127.8, 122.9, 52.7, 49.6, 29.7. HRMS (ESI)  $m/z$  calcd for  $C_{19}H_{20}BrN_3S_2$  ( $M+Na$ )<sup>+</sup> 456.0180, found 456.0185.

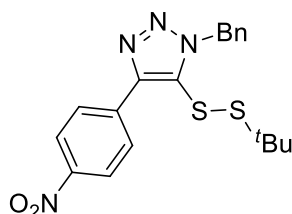

**1-benzyl-5-(tert-butyldisulfanyl)-4-(4-nitrophenyl)-1H-1,2,3-triazole (3i)**

30.4 mg, 76% yield, brown oil. <sup>1</sup>H NMR (400 MHz, CDCl<sub>3</sub>, TMS): δ 8.35 (d,  $J$  = 8.8 Hz, 2H), 8.28 (d,  $J$  = 8.8 Hz, 2H), 7.43-7.34 (m, 5H), 5.79 (s, 2H), 1.13 (s, 9H). <sup>13</sup>C NMR (100 MHz, CDCl<sub>3</sub>): δ 147.6, 146.6, 136.7, 134.3, 129.5, 128.9, 128.6, 128.2, 128.1, 123.9, 52.9, 49.8, 29.6. HRMS (ESI)  $m/z$  calcd for  $C_{19}H_{20}N_4O_2S_2$  ( $M+H$ )<sup>+</sup> 401.1100, found 401.1105.

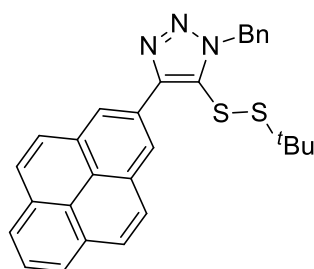

**1-benzyl-5-(tert-butyldisulfanyl)-4-(pyren-2-yl)-1H-1,2,3-triazole (3j)**

30.7 mg, 64% yield, brown oil. <sup>1</sup>H NMR (400 MHz, CDCl<sub>3</sub>, TMS): δ 8.34 (d,  $J$  = 9.2 Hz, 1H), 8.30-8.21 (m, 3H), 8.18-8.03 (m, 5H), 7.55-7.38 (m, 5H), 5.90 (s, 2H), 0.80 (s, 9H). <sup>13</sup>C NMR (100 MHz, CDCl<sub>3</sub>): δ 150.2, 134.9, 131.7, 131.3, 131.0, 130.2, 129.7, 129.0, 128.9, 128.3, 128.1, 128.1, 127.4, 126.1, 125.4, 125.3, 125.2, 125.1,

124.8, 124.7, 124.4, 53.0, 49.1, 29.7, 29.4. HRMS (ESI)  $m/z$  calcd for  $C_{29}H_{25}N_3S_2$  ( $M+Na$ )<sup>+</sup> 502.1388, found 502.1388.

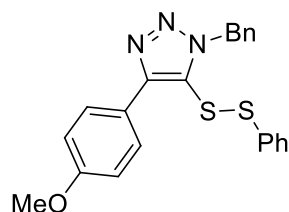

**1-benzyl-4-(4-methoxyphenyl)-5-(phenyldisulfanyl)-1H-1,2,3-triazole (3k)**

30.0 mg, 74% yield, white solid, mp = 88-92 °C. <sup>1</sup>H NMR (400 MHz, CDCl<sub>3</sub>, TMS): δ 8.01 (d,  $J$  = 8.6 Hz, 2H), 7.24-7.18 (m, 5H), 7.16-7.09 (m, 3H), 6.91 (d,  $J$  = 8.6 Hz, 2H), 6.88-6.83 (m, 2H), 5.57 (s, 2H), 3.80 (s, 3H). <sup>13</sup>C NMR (100 MHz, CDCl<sub>3</sub>): δ 160.0, 150.8, 134.6, 133.7, 129.4, 128.7, 128.4, 128.2, 128.1, 126.5, 126.4, 122.8, 121.3, 114.0, 55.3, 52.3. HRMS (ESI)  $m/z$  calcd for  $C_{22}H_{19}N_3OS_2$  ( $M+H$ )<sup>+</sup> 406.1048, found 406.1049.

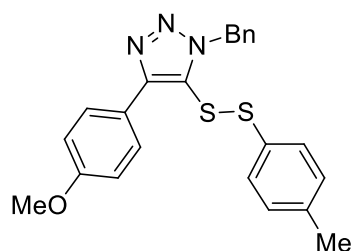

**1-benzyl-4-(4-methoxyphenyl)-5-(p-tolyldisulfanyl)-1H-1,2,3-triazole (3l)**

31.9 mg, 76% yield, white solid, mp = 70-74 °C. <sup>1</sup>H NMR (400 MHz, CDCl<sub>3</sub>, TMS): δ 8.05 (d,  $J$  = 8.8 Hz, 2H), 7.27-7.23 (m, 5H), 6.96 (dd,  $J$  = 10.3, 8.6 Hz, 4H), 6.81 (d,  $J$  = 8.2 Hz, 2H), 5.58 (s, 2H), 3.84 (s, 3H), 2.27 (s, 3H). <sup>13</sup>C NMR (100 MHz, CDCl<sub>3</sub>): δ 160.0, 150.5, 136.7, 134.7, 130.2, 130.1, 128.7, 128.4, 128.1, 128.0, 126.8, 122.9, 122.0, 114.0, 55.3, 52.2, 20.9. HRMS (ESI)  $m/z$  calcd for  $C_{23}H_{21}N_3OS_2$  ( $M+H$ )<sup>+</sup> 420.1204, found 420.1206.

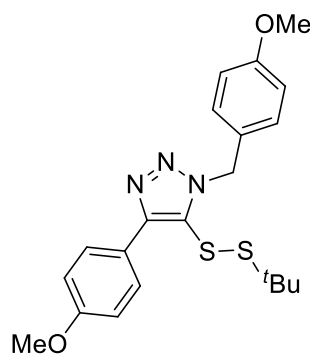

**5-(tert-butylidisulfanyl)-1-(4-methoxybenzyl)-4-(4-methoxyphenyl)-1H-1,2,3-triazole (3m)**

**ole (3m)**

34.0 mg, 82% yield, brown oil.  $^1\text{H}$  NMR (400 MHz,  $\text{CDCl}_3$ ):  $\delta$  7.95 (d,  $J$  = 8.7 Hz, 2H), 7.34 (d,  $J$  = 8.6 Hz, 2H), 7.01 (d,  $J$  = 8.7 Hz, 2H), 6.89 (d,  $J$  = 8.6 Hz, 2H), 5.69 (s, 2H), 3.87 (s, 3H), 3.81 (s, 3H), 1.12 (s, 9H).  $^{13}\text{C}$  NMR (100 MHz,  $\text{CDCl}_3$ ):  $\delta$  159.9, 159.6, 149.2, 129.7, 129.2, 126.9, 126.4, 123.1, 114.1, 113.9, 55.3, 55.3, 52.1, 49.4, 29.7. HRMS (ESI)  $m/z$  calcd for  $\text{C}_{21}\text{H}_{25}\text{N}_3\text{O}_2\text{S}_2$  ( $\text{M}+\text{Na}$ ) $^+$  438.1280, found 438.1283.

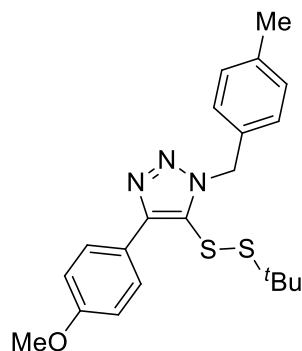**5-(tert-butylidisulfanyl)-4-(4-methoxyphenyl)-1-(4-methylbenzyl)-1H-1,2,3-triazole (3n)**

32.0 mg, 80% yield, brown solid, mp = 59-62  $^{\circ}\text{C}$ .  $^1\text{H}$  NMR (400 MHz,  $\text{CDCl}_3$ , TMS):  $\delta$  7.97 (d,  $J$  = 8.8 Hz, 2H), 7.28 (d,  $J$  = 7.9 Hz, 2H), 7.18 (d,  $J$  = 7.6 Hz, 2H), 7.01 (d,  $J$  = 8.8 Hz, 2H), 5.72 (s, 2H), 3.88 (s, 3H), 2.36 (s, 3H), 1.12 (s, 9H).  $^{13}\text{C}$  NMR (100 MHz,  $\text{CDCl}_3$ ):  $\delta$  159.9, 149.2, 138.1, 131.9, 129.4, 129.2, 128.1, 126.5, 123.1, 113.9, 55.3, 52.4, 49.4, 29.7, 21.2. HRMS (ESI)  $m/z$  calcd for  $\text{C}_{21}\text{H}_{25}\text{N}_3\text{OS}_2$  ( $\text{M}+\text{Na}$ ) $^+$  422.1331, found 422.1332.

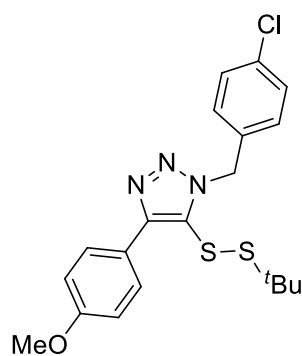**5-(tert-butylidisulfanyl)-1-(4-chlorobenzyl)-4-(4-methoxyphenyl)-1H-1,2,3-triazole (3o)**

31.4 mg, 75% yield, brown oil.  $^1\text{H}$  NMR (400 MHz,  $\text{CDCl}_3$ , TMS):  $\delta$  7.96 (d,  $J$  = 8.7 Hz, 2H), 7.35 (d,  $J$  = 8.4 Hz, 2H), 7.31 (d,  $J$  = 8.4 Hz, 2H), 7.01 (d,  $J$  = 8.7 Hz, 2H), 5.72 (s, 2H), 3.88 (s, 3H), 1.10 (s, 9H).  $^{13}\text{C}$  NMR (100 MHz,  $\text{CDCl}_3$ ):  $\delta$  160.0, 149.3, 134.3, 133.3, 129.5, 129.2, 129.0, 126.6, 122.9, 114.0, 55.3, 51.8, 49.5, 29.6. HRMS (ESI)  $m/z$  calcd for  $\text{C}_{20}\text{H}_{22}\text{ClN}_3\text{OS}_2$  ( $\text{M}+\text{Na}$ ) $^+$  442.0785, found 442.0786.

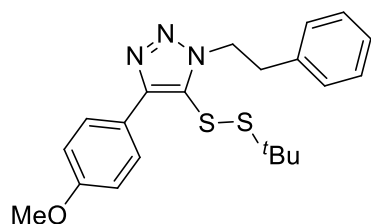

**5-(*tert*-butyldisulfanyl)-4-(4-methoxyphenyl)-1-phenethyl-1*H*-1,2,3-triazole (3q)**

33.5 mg, 84% yield, brown solid, mp = 80-83 °C. <sup>1</sup>H NMR (400 MHz, CDCl<sub>3</sub>, TMS): δ 7.95 (d, *J* = 8.6 Hz, 2H), 7.36-7.25 (m, 5H), 7.03 (d, *J* = 8.6 Hz, 2H), 4.81-4.68 (m, 2H), 3.89 (s, 3H), 3.44-3.32 (m, 2H), 1.11 (s, 9H). <sup>13</sup>C NMR (100 MHz, CDCl<sub>3</sub>): δ 159.9, 148.9, 137.3, 129.3, 129.0, 128.8, 127.0, 126.9, 123.2, 114.0, 55.3, 50.0, 49.4, 36.3, 29.7. HRMS (ESI) *m/z* calcd for C<sub>21</sub>H<sub>25</sub>N<sub>3</sub>OS<sub>2</sub> (M+Na)<sup>+</sup> 422.1331, found 422.1330.

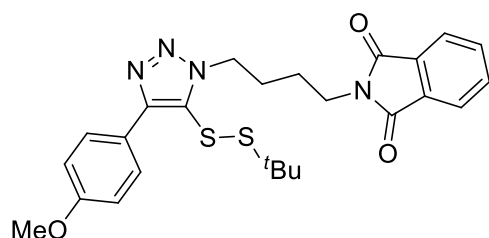

**2-(4-(5-(*tert*-butyldisulfanyl)-4-(4-methoxyphenyl)-1*H*-1,2,3-triazol-1-yl)butyl)isobenzodione (3r)**

41.2 mg, 83% yield, brown oil. <sup>1</sup>H NMR (400 MHz, CDCl<sub>3</sub>) δ 7.93 (d, *J* = 8.6 Hz, 2H), 7.86-7.81 (m, 2H), 7.74-7.69 (m, 2H), 7.00 (d, *J* = 8.6 Hz, 2H), 4.56 (t, *J* = 7.2 Hz, 2H), 3.86 (s, 3H), 3.78 (t, *J* = 6.9 Hz, 2H), 2.17-2.06 (m, 2H), 1.90-1.78 (m, 2H), 1.07 (s, 9H). <sup>13</sup>C NMR (100 MHz, CDCl<sub>3</sub>): δ 168.3, 159.8, 149.0, 134.0, 132.1, 129.3, 126.6, 123.3, 123.1, 113.9, 55.3, 49.4, 48.2, 37.2, 29.6, 27.0, 25.7. HRMS (ESI) *m/z* calcd for C<sub>25</sub>H<sub>28</sub>N<sub>4</sub>O<sub>3</sub>S<sub>2</sub> (M+Na)<sup>+</sup> 519.1495, found 519.1498.

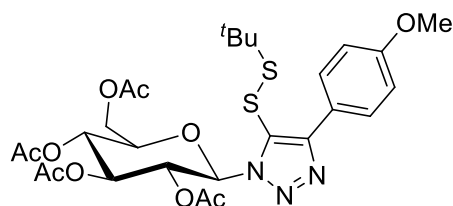

**(2*R*,3*R*,4*S*,5*R*,6*R*)-2-(acetoxymethyl)-6-(5-(*tert*-butyldisulfanyl)-4-(4-methoxyphenyl)-1*H*-1,2,3-triazol-1-yl)tetrahydro-2*H*-pyran-3,4,5-triyl triacetate (3s)**

39.4 mg, 63% yield, colorless oil. <sup>1</sup>H NMR (400 MHz, CDCl<sub>3</sub>, TMS): δ 7.97 (d, *J* = 8.9 Hz, 2H), 7.00 (d, *J* = 8.9 Hz, 2H), 6.17 (t, *J* = 9.4 Hz, 1H), 6.05 (d, *J* = 9.5 Hz, 1H), 5.47 (t, *J* = 9.4 Hz, 1H), 5.36 (t, *J* = 9.7 Hz, 1H), 4.33-4.27 (m, 1H), 4.20 (dd, *J* = 12.5, 2.2 Hz, 1H), 4.03 (ddd, *J* = 10.0, 4.3, 2.3 Hz, 1H), 3.87 (s, 3H), 2.08 (s, 3H), 2.07 (s, 3H), 2.05 (s, 3H), 1.85 (s, 3H), 1.12 (s, 9H). <sup>13</sup>C NMR (100 MHz, CDCl<sub>3</sub>) δ

170.6, 170.4, 169.2, 168.3, 160.2, 149.2, 129.4, 128.3, 122.3, 114.0, 83.1, 74.9, 73.8, 69.5, 67.7, 61.5, 55.3, 49.6, 29.7, 20.7, 20.6, 20.6, 20.4. HRMS (ESI)  $m/z$  calcd for  $C_{27}H_{35}N_3O_{10}S_2$  ( $M+Na$ )<sup>+</sup> 648.1661, found 648.1660.

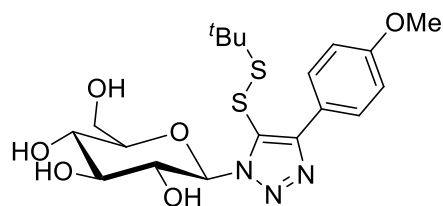

**(2R,3R,4S,5S,6R)-2-(5-(*tert*-butyldisulfanyl)-4-(4-methoxyphenyl)-1H-1,2,3-triazol-1-yl)-6-(hydroxymethyl)tetrahydro-2H-pyran-3,4,5-triol (4s)**

22.6 mg, 99% yield, yellow oil. <sup>1</sup>H NMR (400 MHz, CDCl<sub>3</sub>, TMS): δ 7.76 (d,  $J$  = 8.8 Hz, 2H), 6.91 (d,  $J$  = 8.8 Hz, 2H), 5.82 (d,  $J$  = 9.0 Hz, 1H), 5.72 (brs, 2H), 5.48 (brs, 1H), 4.69 (t,  $J$  = 9.0 Hz, 1H), 4.36-4.17 (m, 1H), 4.14 (d,  $J$  = 7.2 Hz, 1H), 4.05-3.91 (m, 2H), 3.83 (s, 3H), 3.68 (d,  $J$  = 9.4 Hz, 1H), 2.89 (brs, 1H), 1.03 (s, 9H). <sup>13</sup>C NMR (100 MHz, CDCl<sub>3</sub>): δ 160.0, 148.2, 129.3, 122.0, 113.9, 85.5, 78.9, 72.0, 68.7, 65.6, 61.0, 60.4, 55.3, 49.4, 29.6. HRMS (ESI)  $m/z$  calcd for  $C_{19}H_{27}N_3O_6S_2$  ( $M+Na$ )<sup>+</sup> 480.1239, found 480.1189.

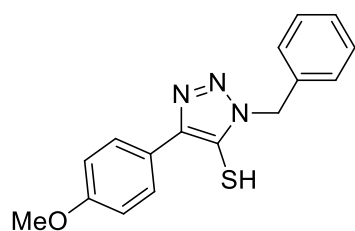

**1-benzyl-4-(4-methoxyphenyl)-1H-1,2,3-triazole-5-thiol (4a)**

16.1 mg, 54% yield, yellow oil. <sup>1</sup>H NMR (400 MHz, CDCl<sub>3</sub>, TMS): δ 7.72 (d,  $J$  = 8.8 Hz, 2H), 7.36-7.30 (m, 3H), 7.21 (dd,  $J$  = 6.6, 2.8 Hz, 2H), 6.86 (d,  $J$  = 8.9 Hz, 2H), 5.32 (s, 2H), 3.87 (s, 3H). <sup>13</sup>C NMR (125 MHz, CDCl<sub>3</sub>): δ 160.3, 150.5, 134.4, 128.9, 128.6, 128.3, 128.0, 123.2, 121.8, 114.1, 55.4, 52.3. HRMS (ESI)  $m/z$  calcd for  $C_{16}H_{15}N_3OS$  ( $M+H$ )<sup>+</sup> 298.1014, found 298.1013.

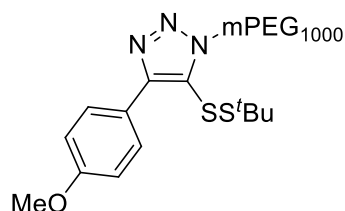

**1-polyethyleneglycol-5-(*tert*-butyldisulfanyl)-4-(4-methoxyphenyl)-1H-1,2,3-triazole (3t)**

93.1 mg, 65% yield, brown solid. <sup>1</sup>H NMR (400 MHz, CDCl<sub>3</sub>, TMS) δ 7.97 (d,  $J$  =

8.4 Hz, 2H), 7.02 (d,  $J = 8.5$  Hz, 2H), 4.73 (t,  $J = 6.1$  Hz, 2H), 4.08 (t,  $J = 6.1$  Hz, 2H), 3.89 (s, 3H), 3.66 (s, 108H), 3.40 (s, 3H), 1.12 (s, 9H).  $^{13}\text{C}$  NMR (125 MHz,  $\text{CDCl}_3$ ):  $\delta$  159.8, 148.8, 129.2, 127.3, 123.1, 113.9, 71.9, 70.7, 70.6, 70.6, 70.5, 69.0, 59.0, 55.3, 49.3, 48.2, 29.7. MALDI-TOF  $m/z$  found 1432.7.

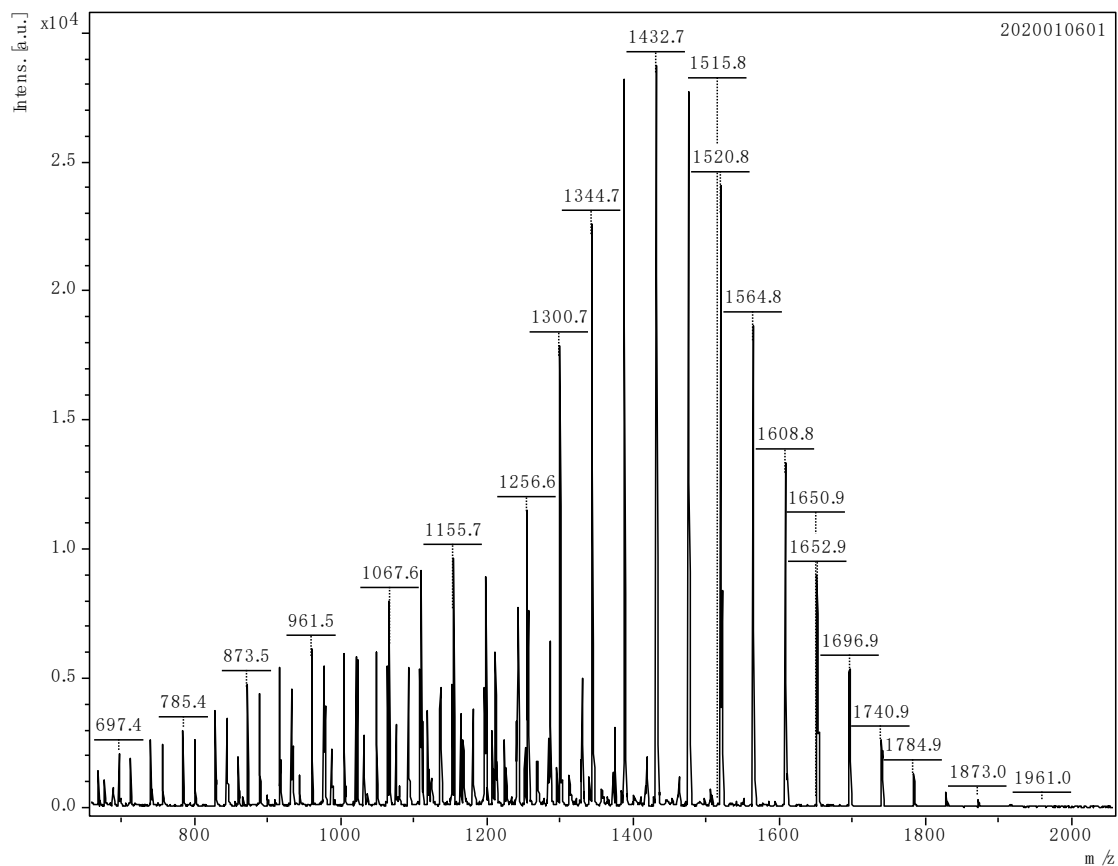

## 10 References

- (S1) Gui, Y.; Qiu, L.; Li, Y.; Li, H.; Dong, S. *J. Am. Chem. Soc.* **2016**, *138*, 4890.
- (S2) (a) Xu, J.; Song, Q. *Org. Chem. Front.* **2017**, *4*, 938. (b) Liu, E.-C.; Topczewski, J. J. *J. Am. Chem. Soc.* **2019**, *141*, 5135.
- (S3) Wang, W.; Lin, Y.; Ma, Y.; Tung, C. -H.; Xu, Z. *Org. Lett.* **2018**, *21*, 2956.
- (S4) Perrin, C. L.; Fabian M. A.; Brunckova, J.; Ohta, B. K. *J. Am. Chem. Soc.* **1999**, *121*, 6911.
- (S5) Ookawa, A.; Yokoyama, S.; Soai, K. *Synth. Commun.* **1986**, *16*, 819.
- (S6) Albertin, G.; Antoniutti, S.; Baldan, D.; Castro, J.; Garc ía-Font án, S. *Inorg. Chem.* **2008**, *47*, 742.
- (S7) For the three-membered-ring iridium-sulfur interaction, see: (a) S. Ding, G. Jia and J. Sun, *Angew. Chem. Int. Ed.* **2014**, *53*, 1877. (b) A. F. Dalebrook, L. J. Wright, *Organometallics* **2009**, *28*, 5536.
- (S8) For the four-membered-ring iridium-sulfur interaction, see: S. Basu, R. Acharyya, F. Basuli, S.-M. Peng, G.-H. Lee, G. Mostafa, S. Bhattacharya, *Inorg. Chim. Acta*, **2010**, *363*, 2848.

## 11 NMR Spectra

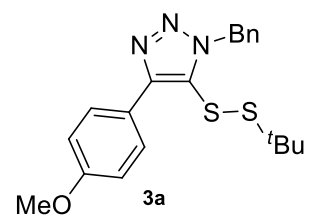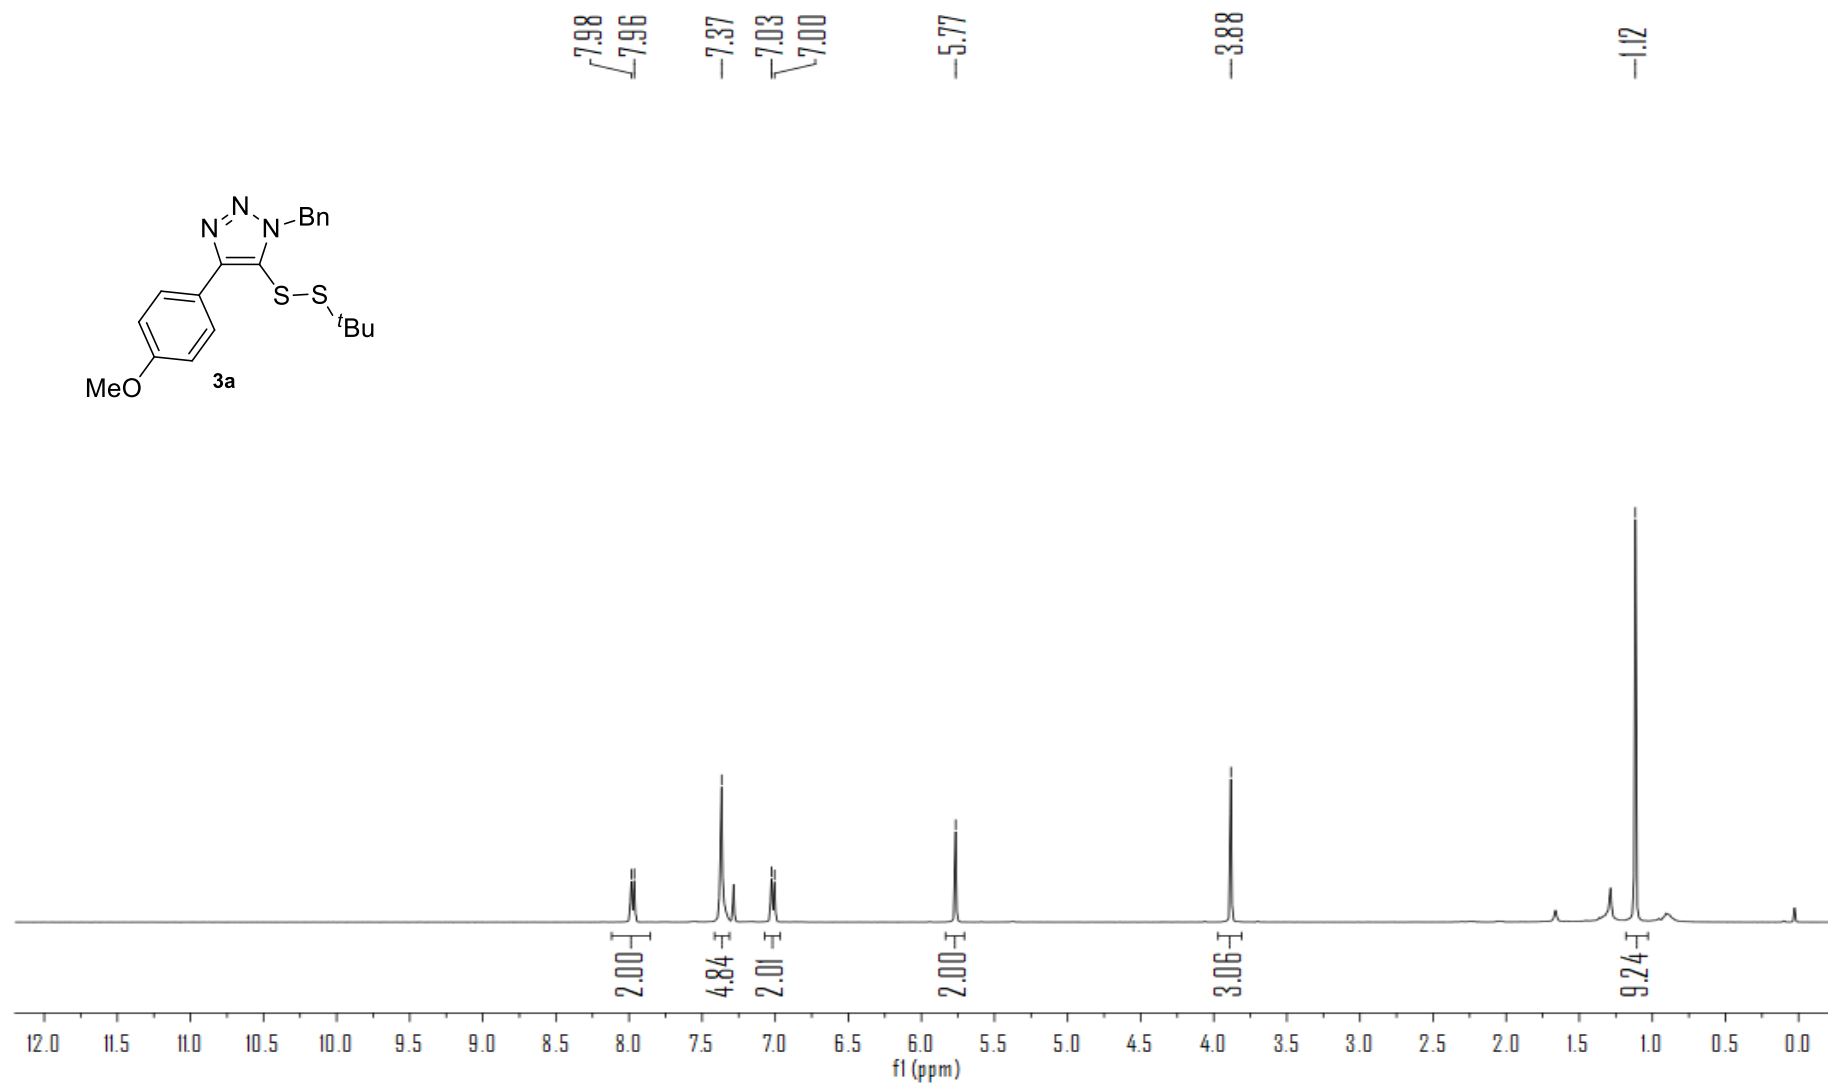



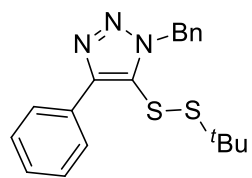

3b

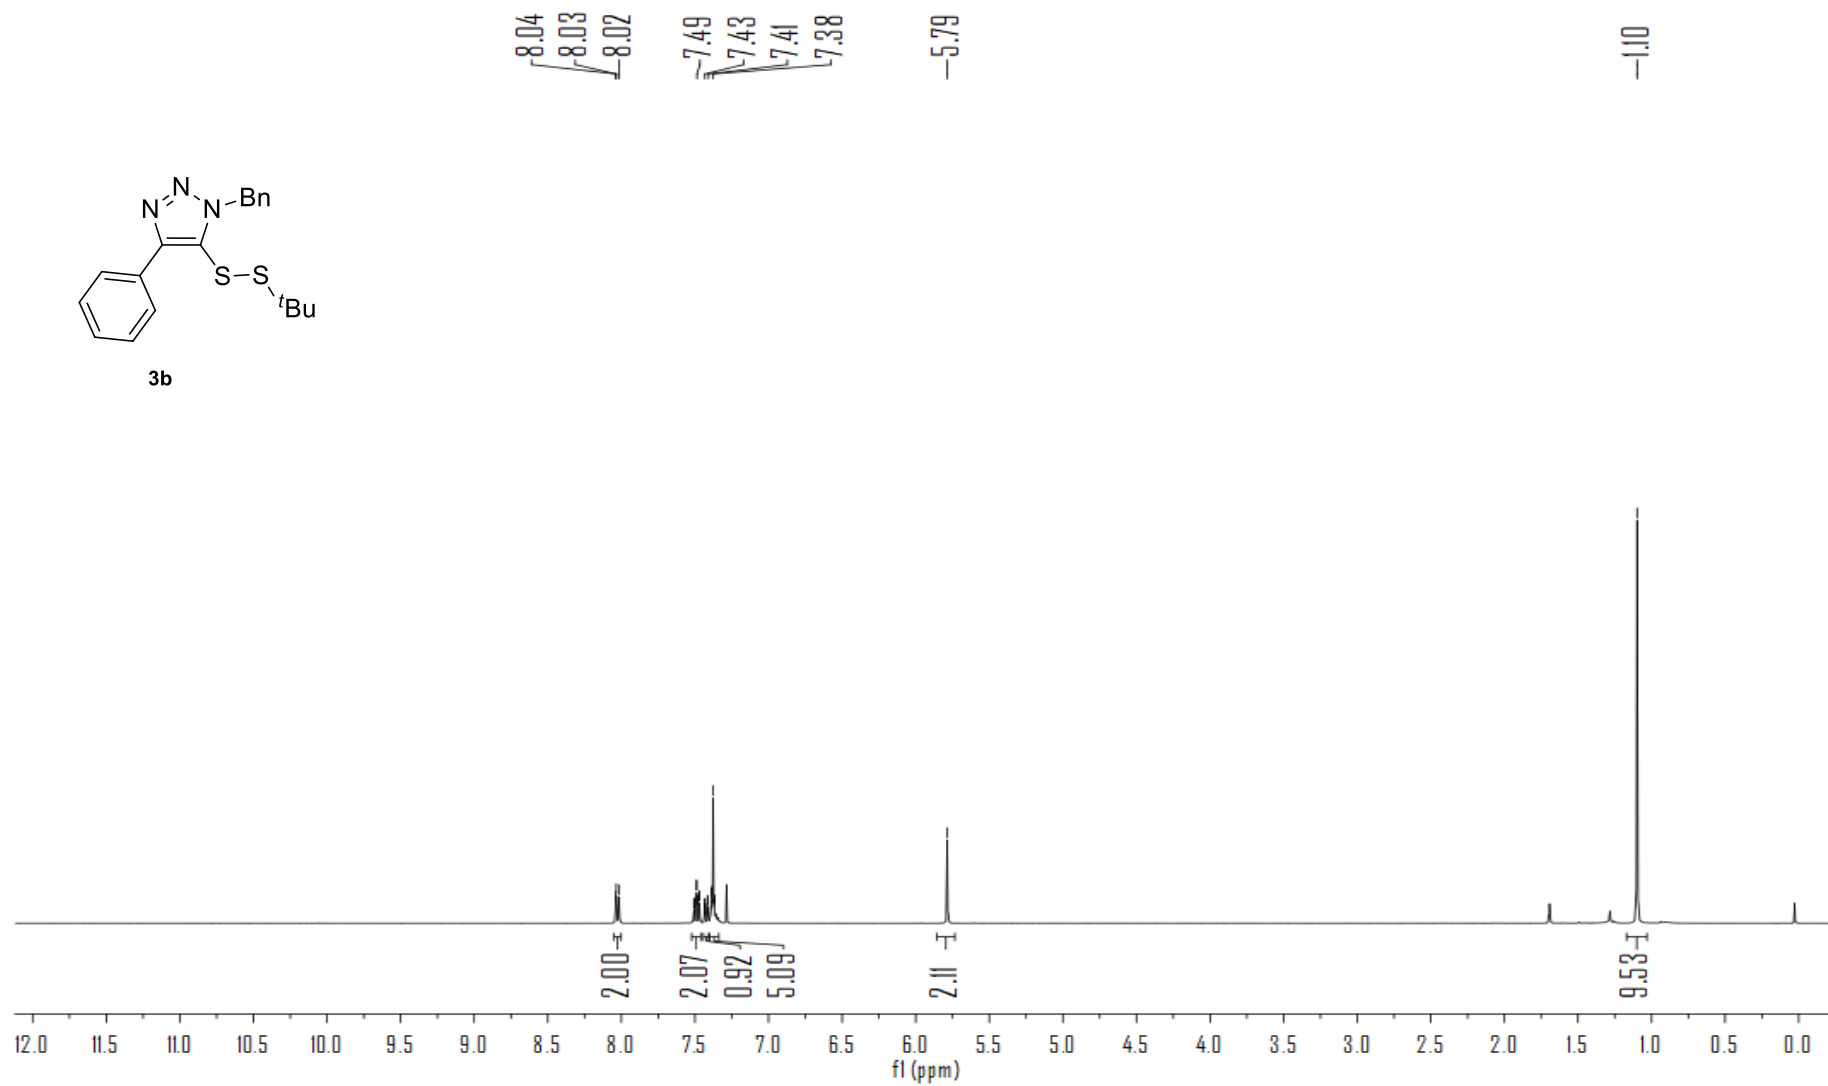

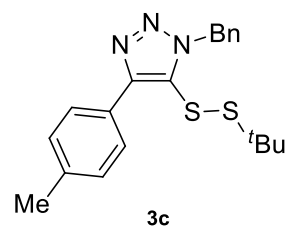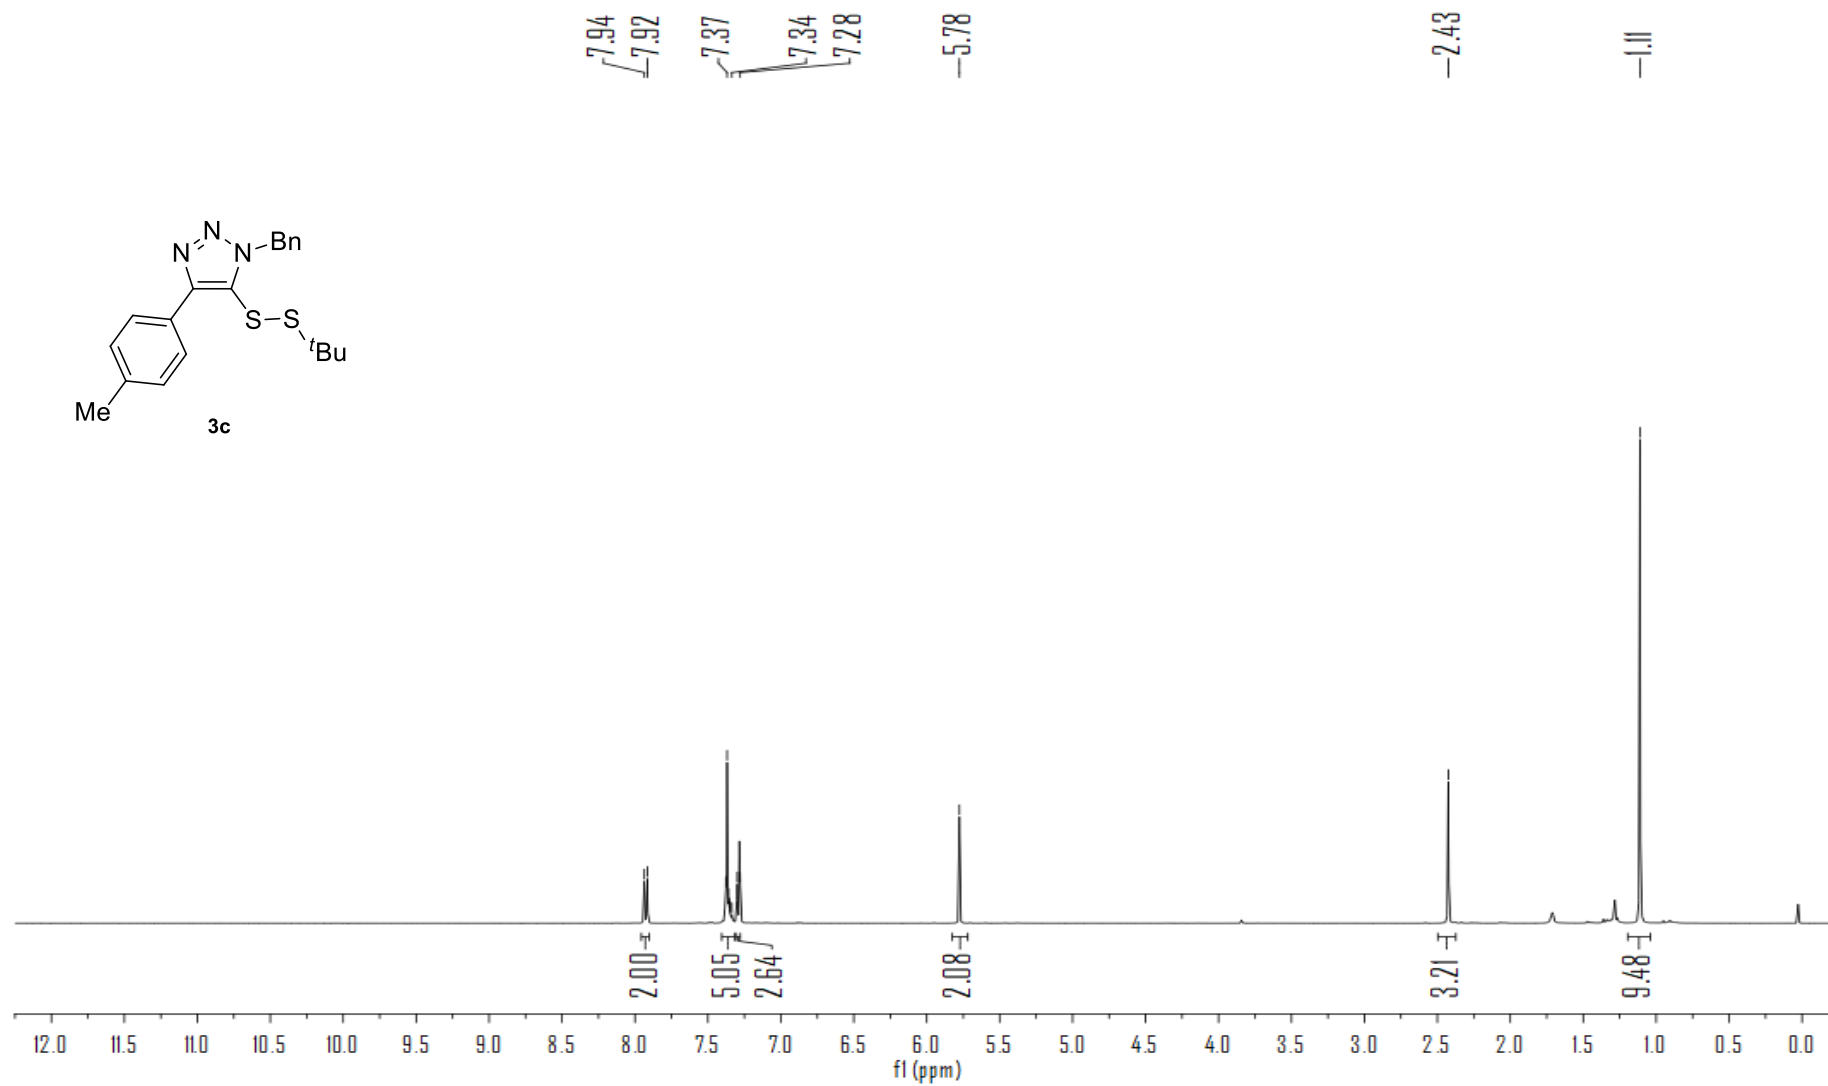

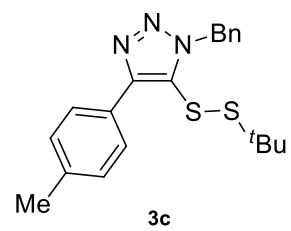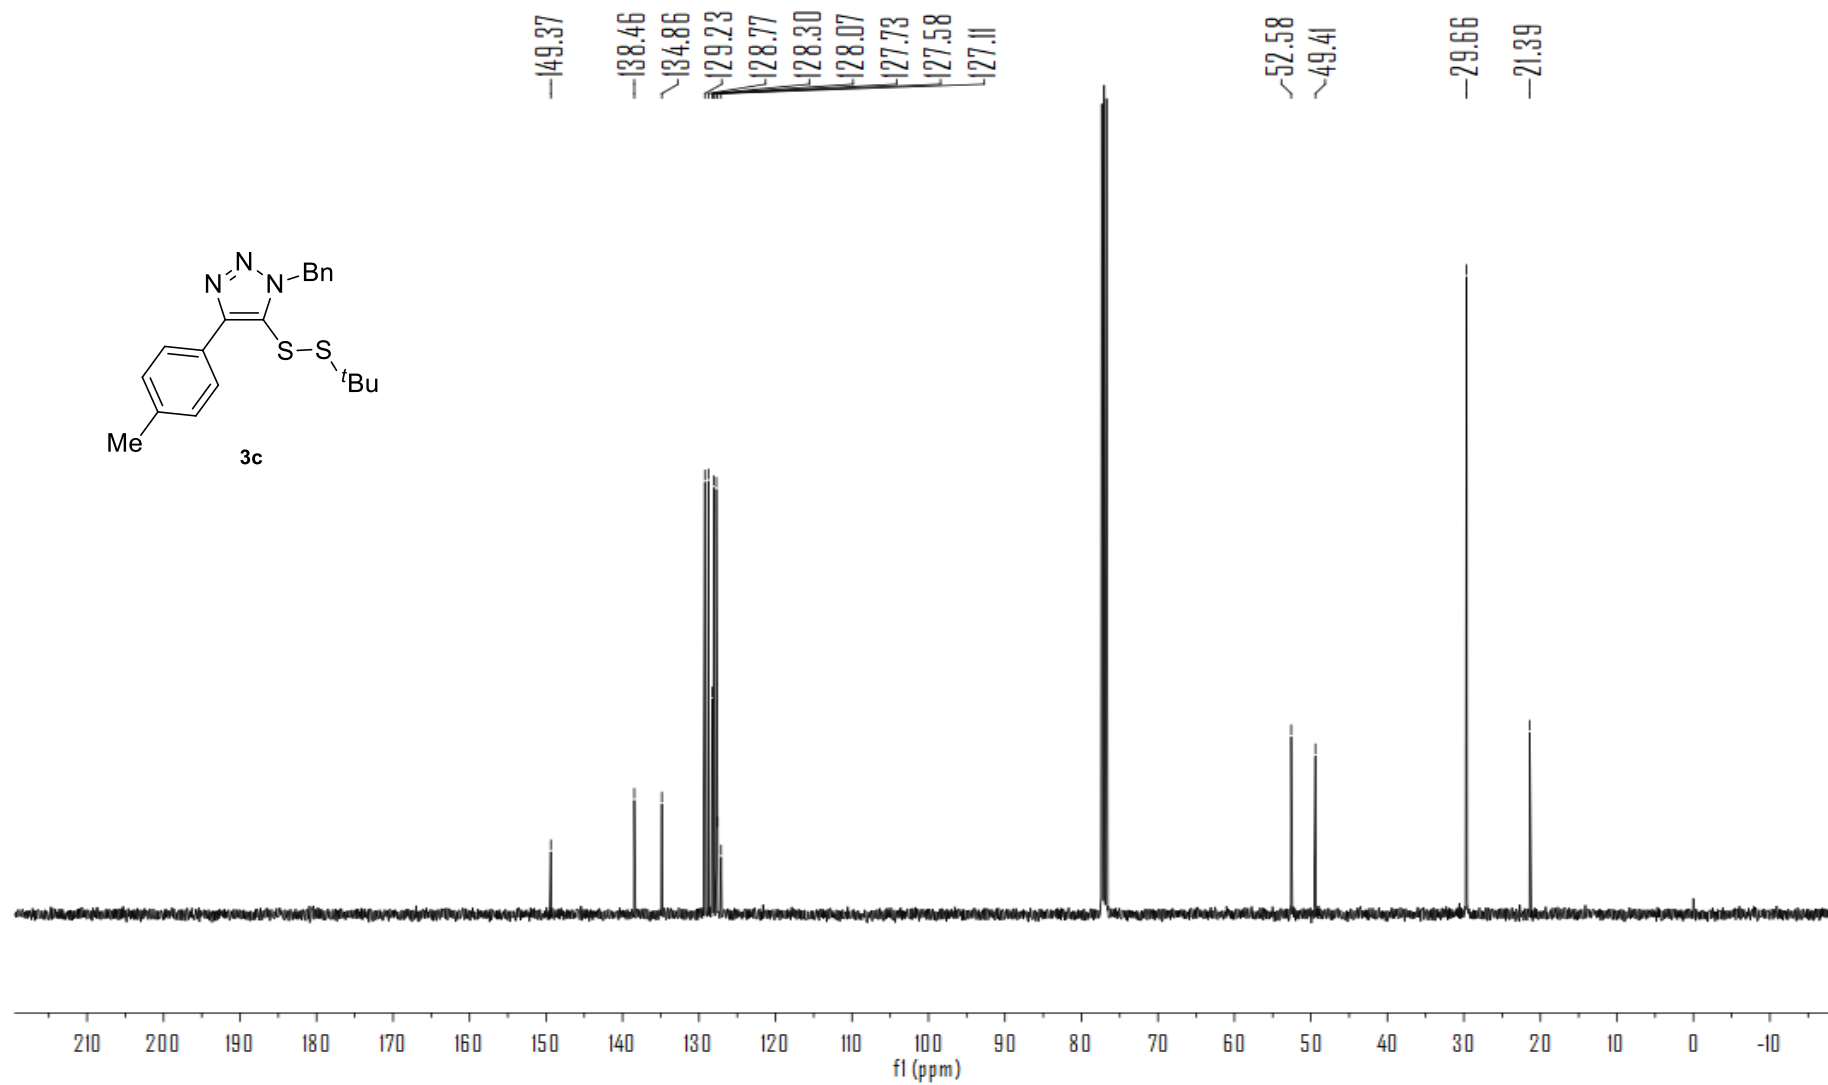

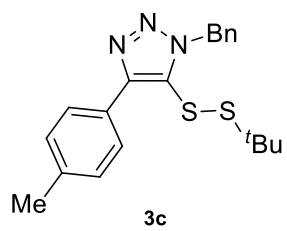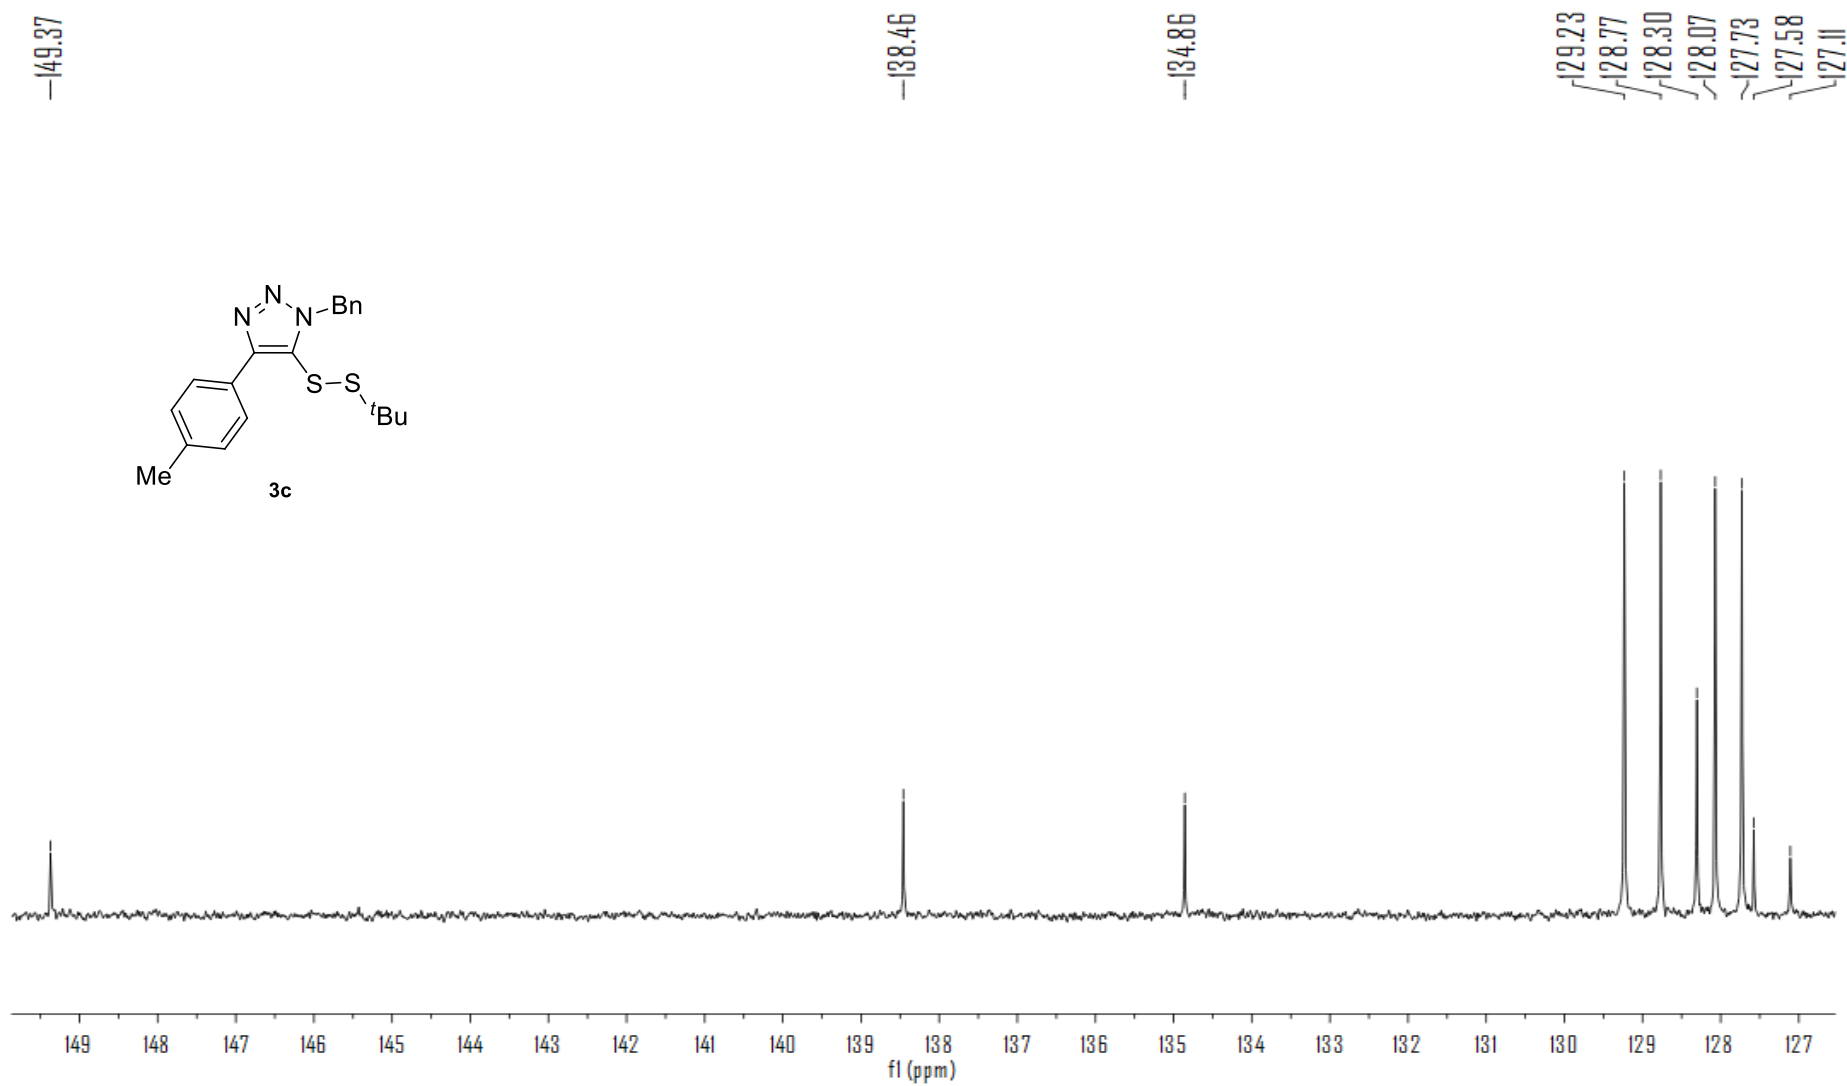

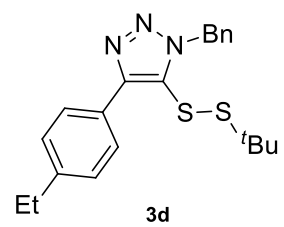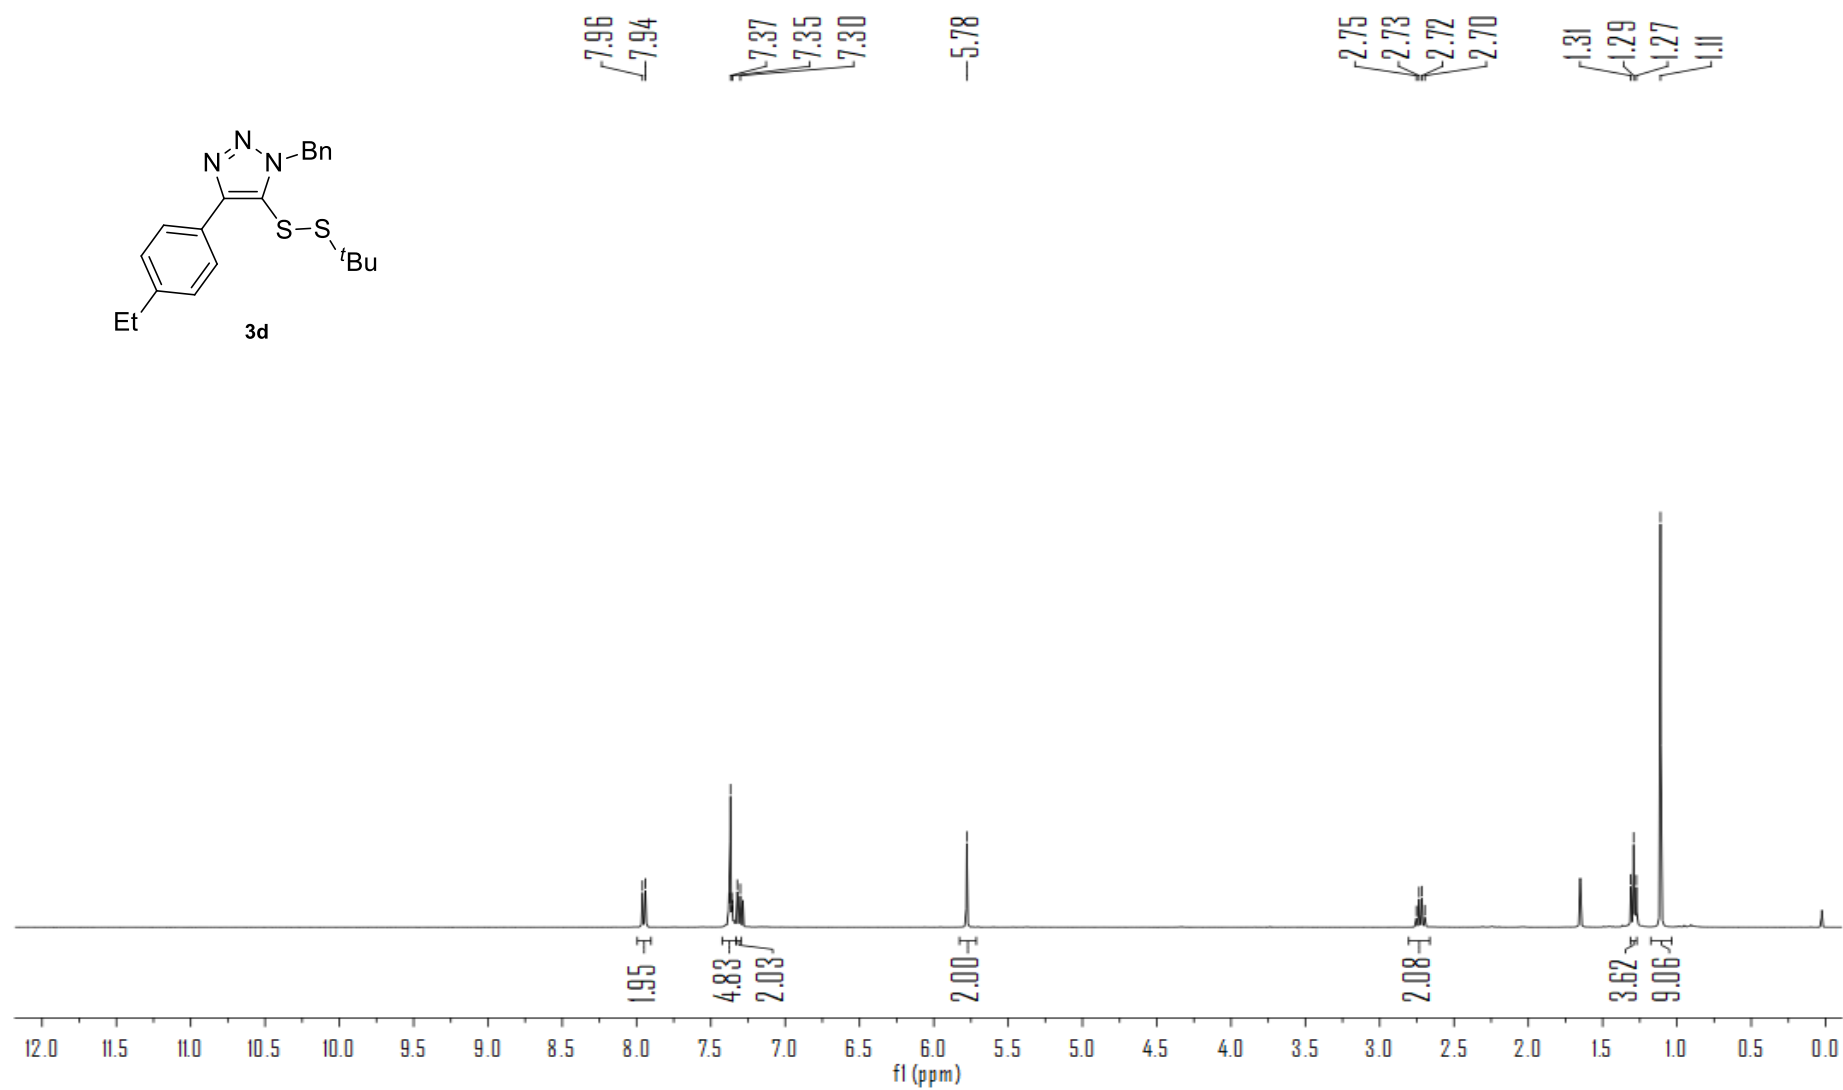

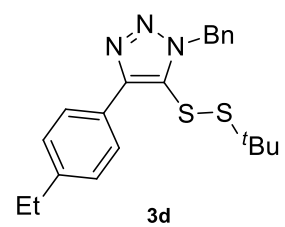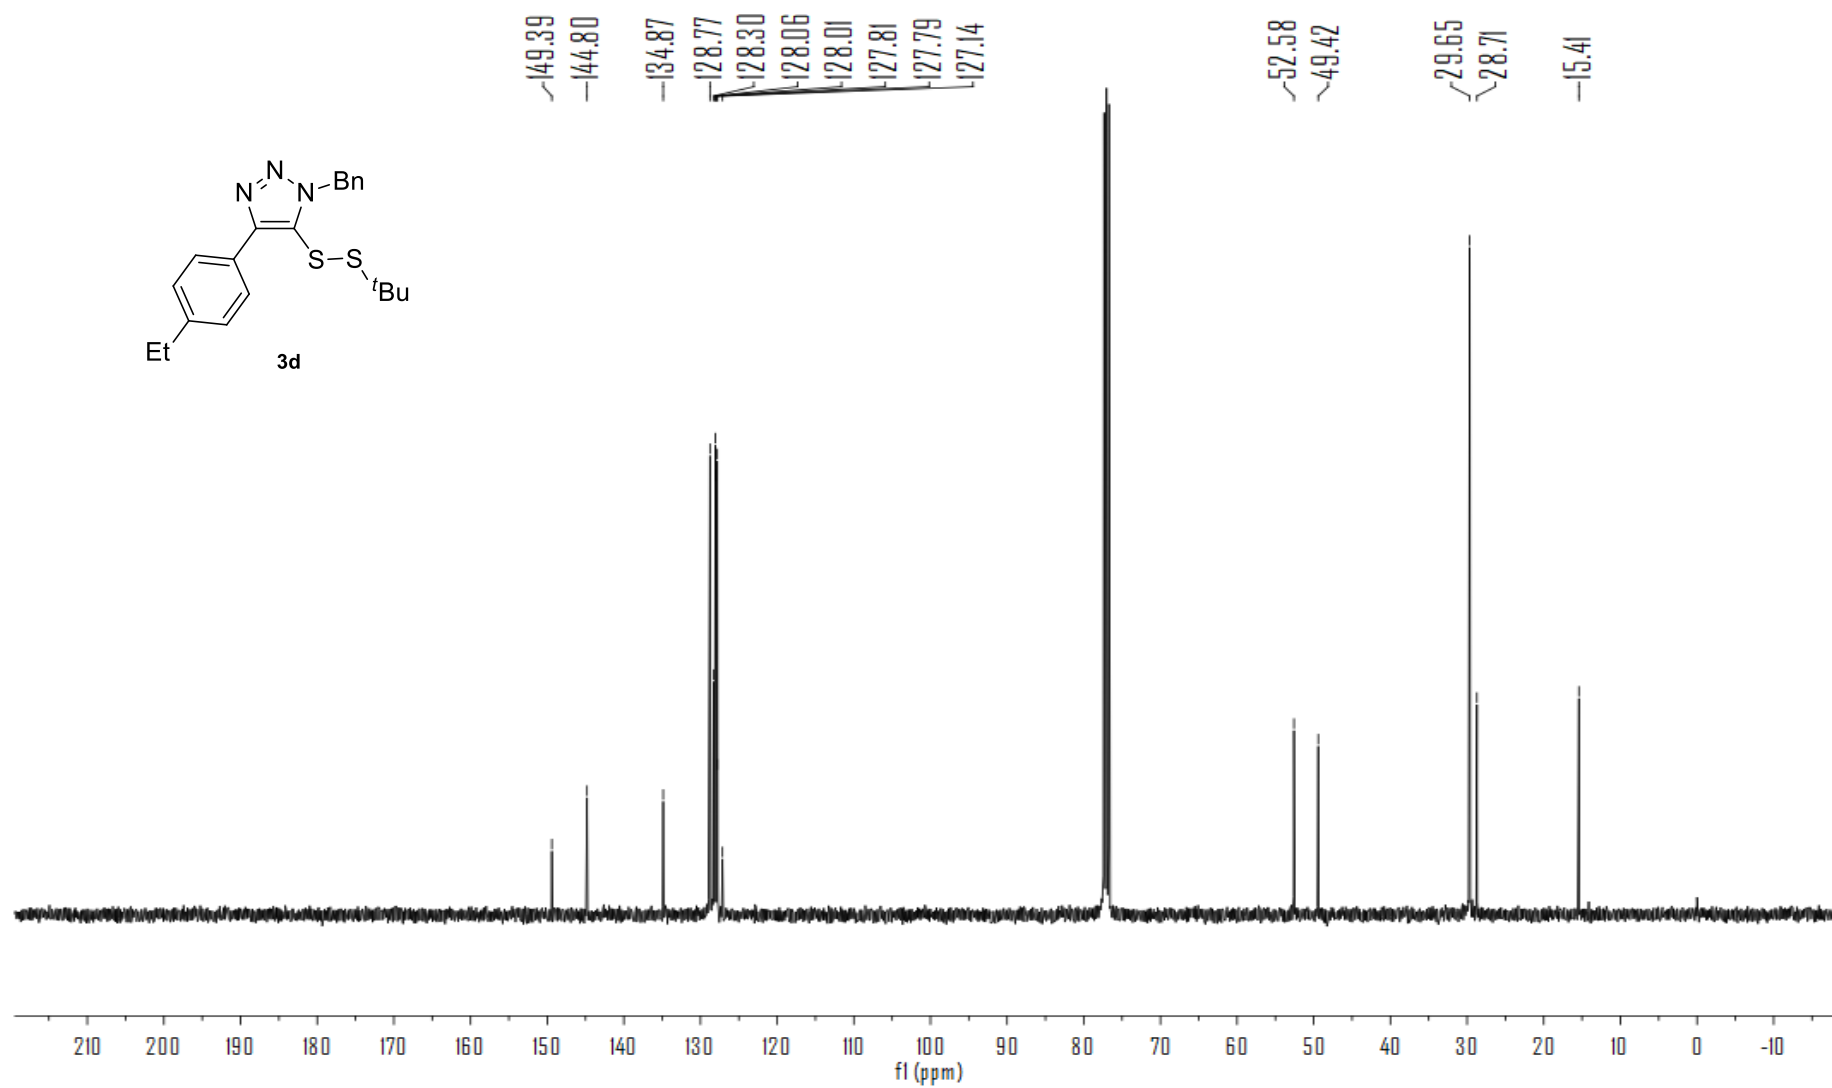

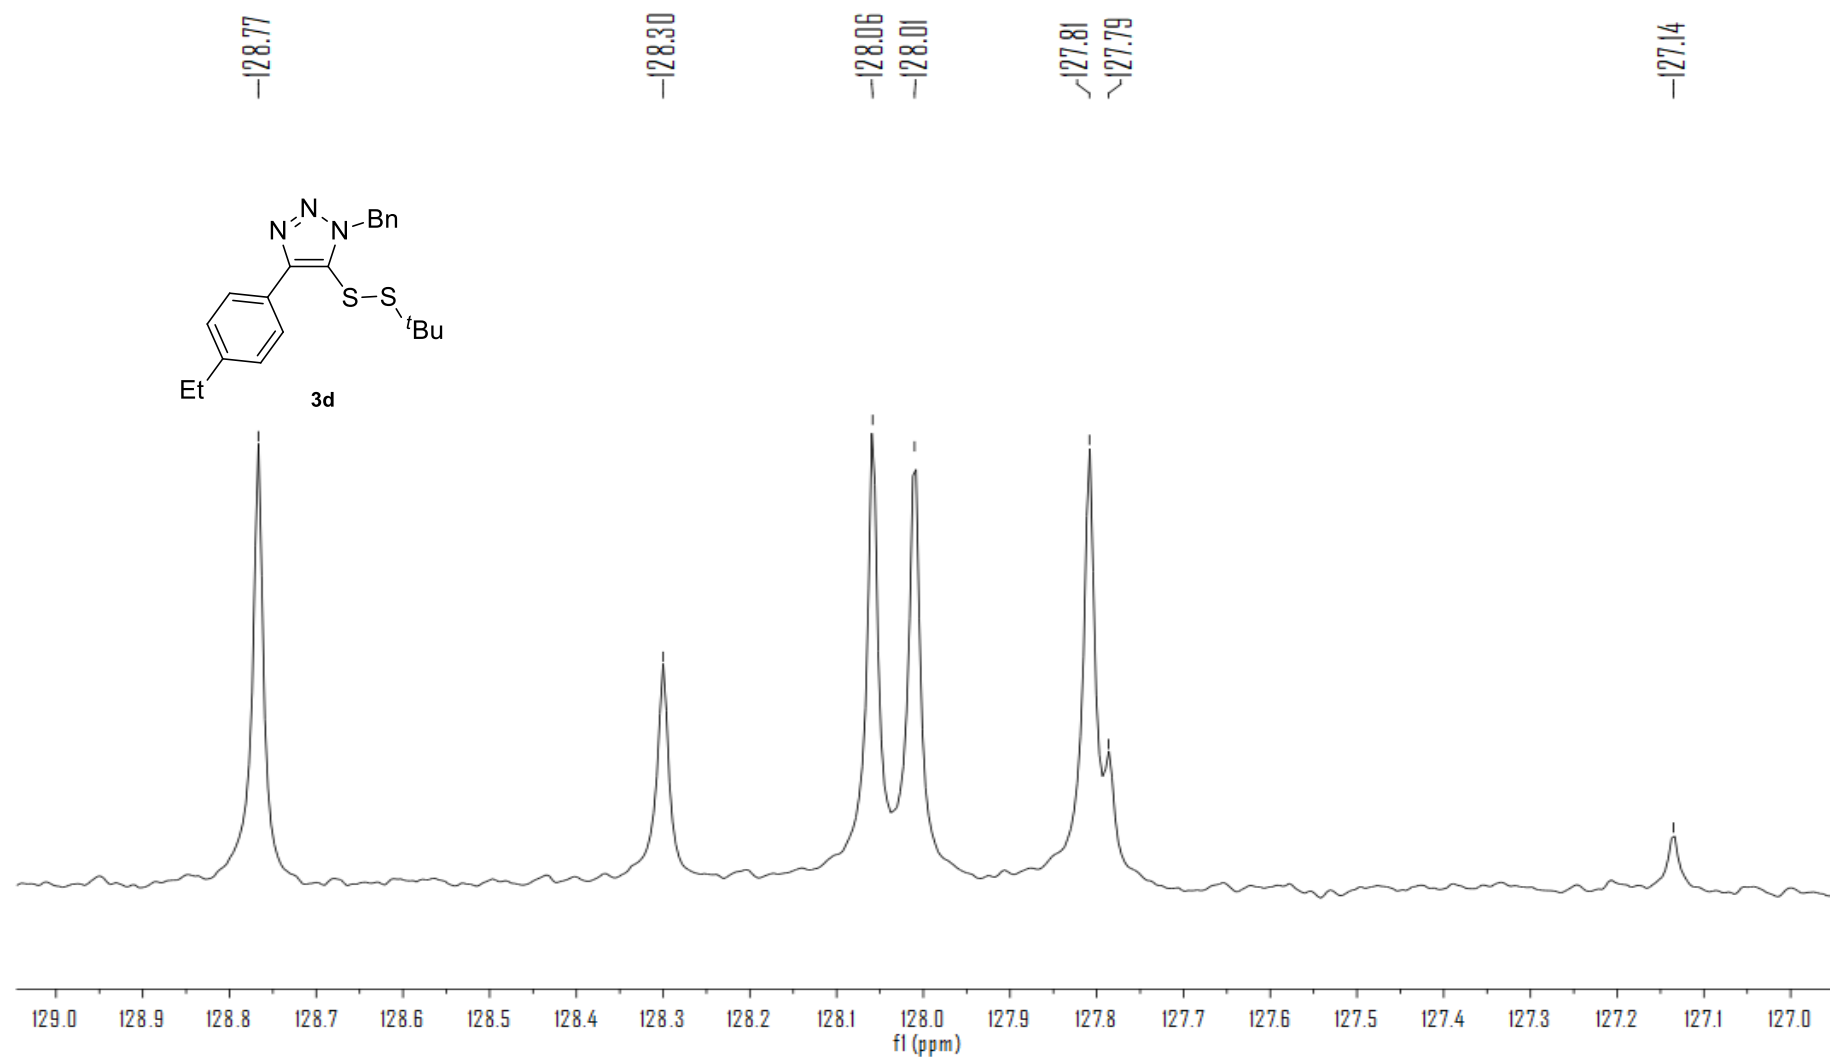

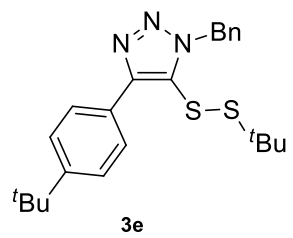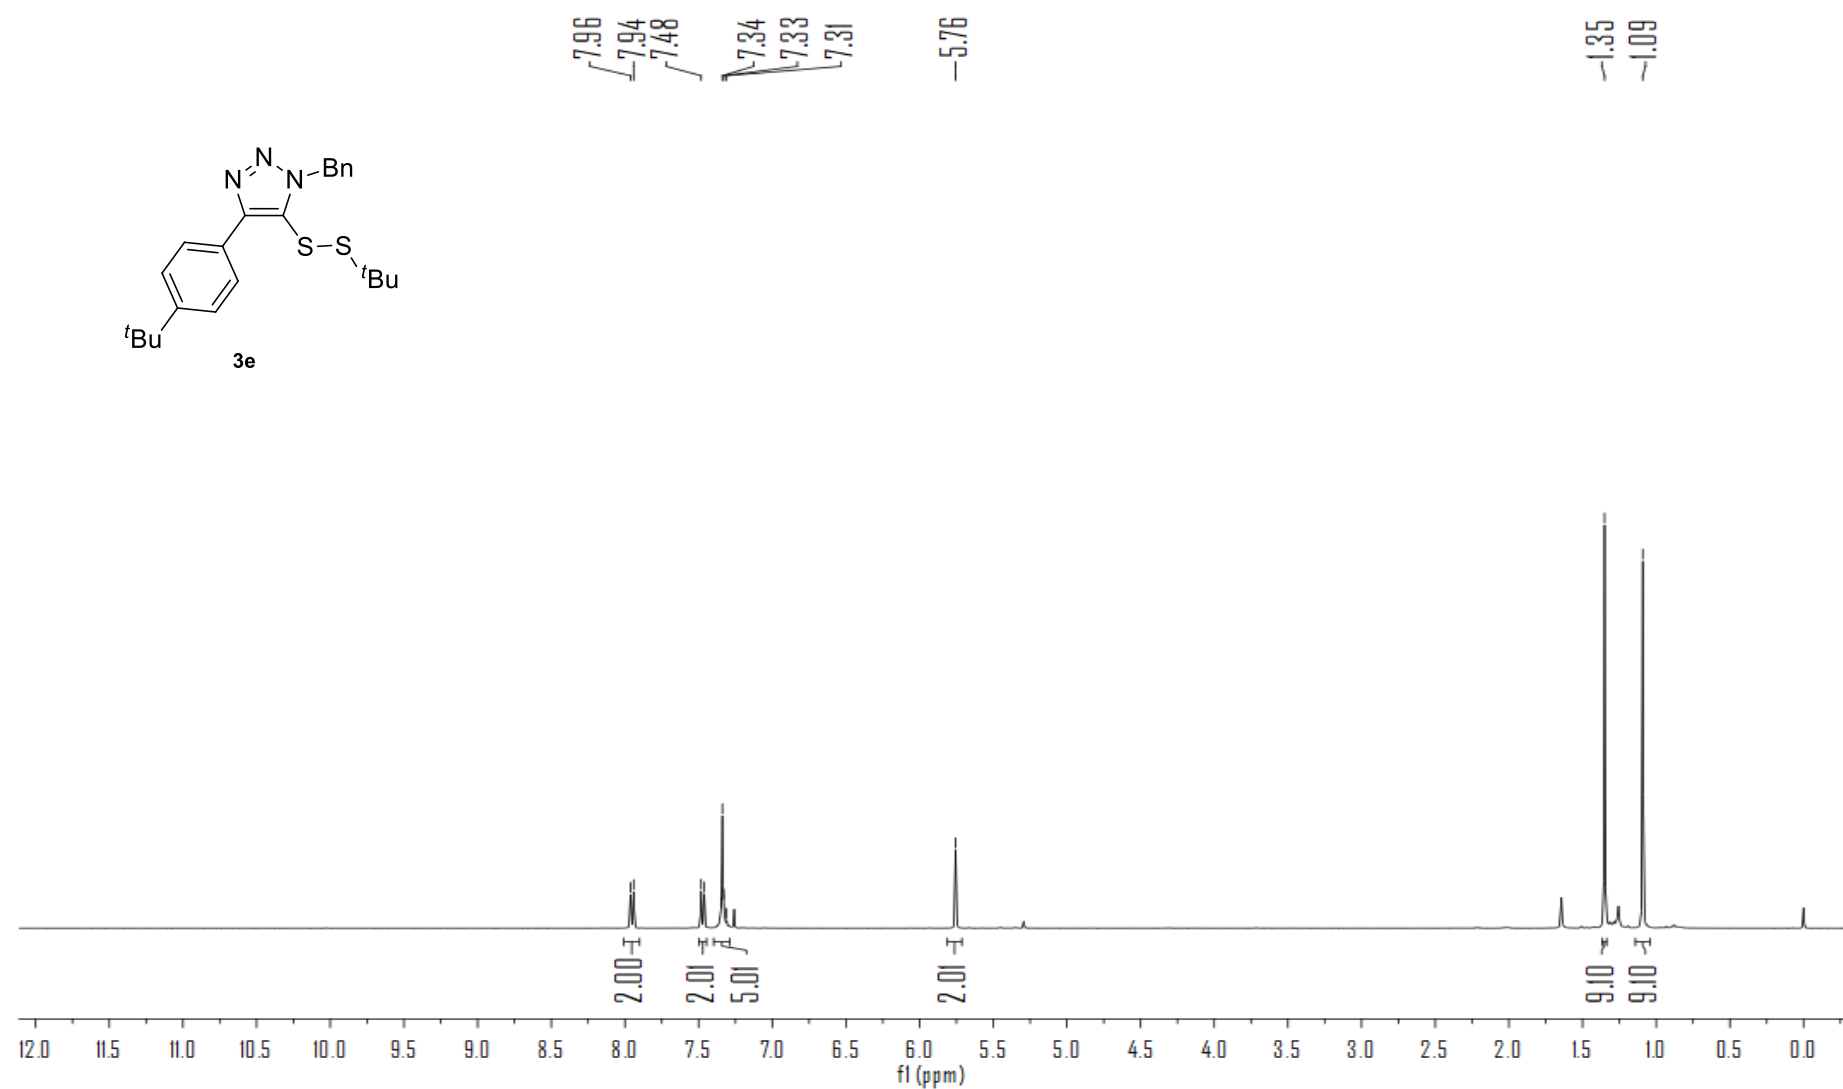



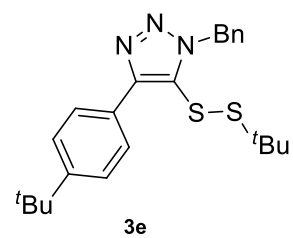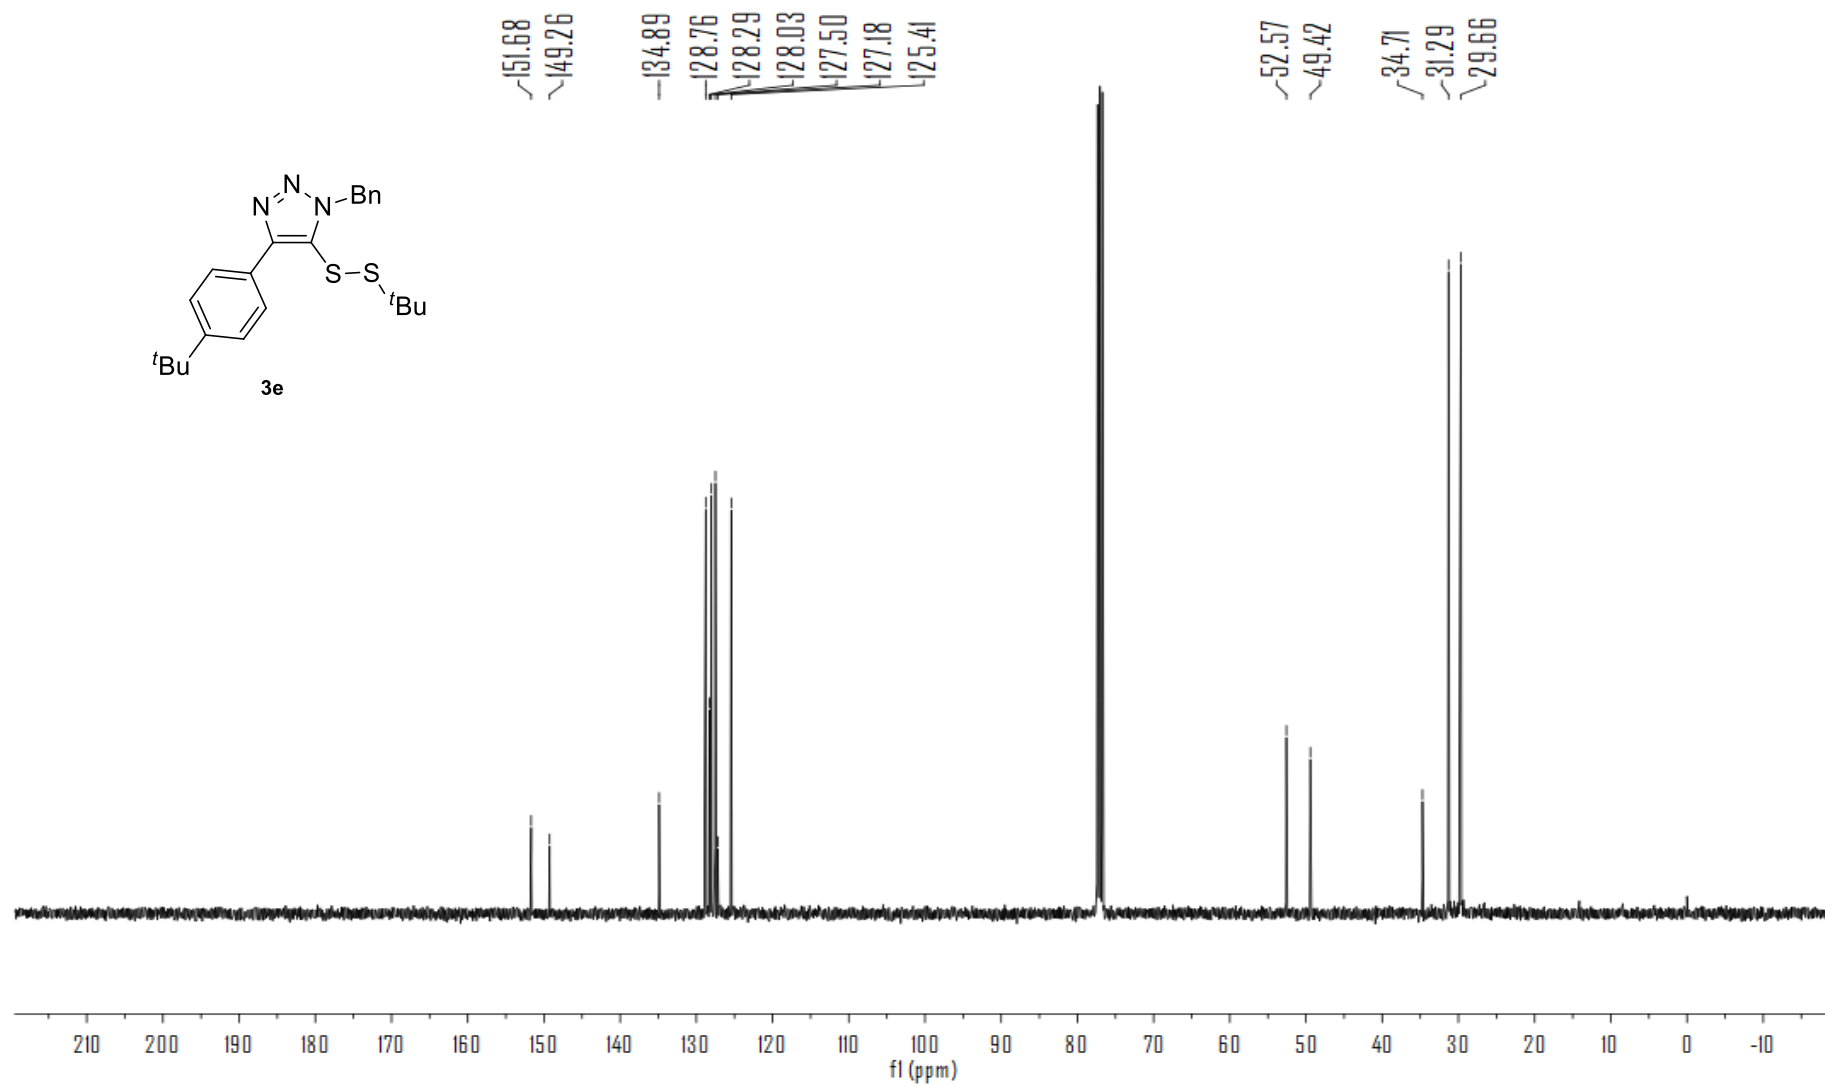

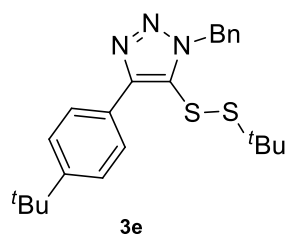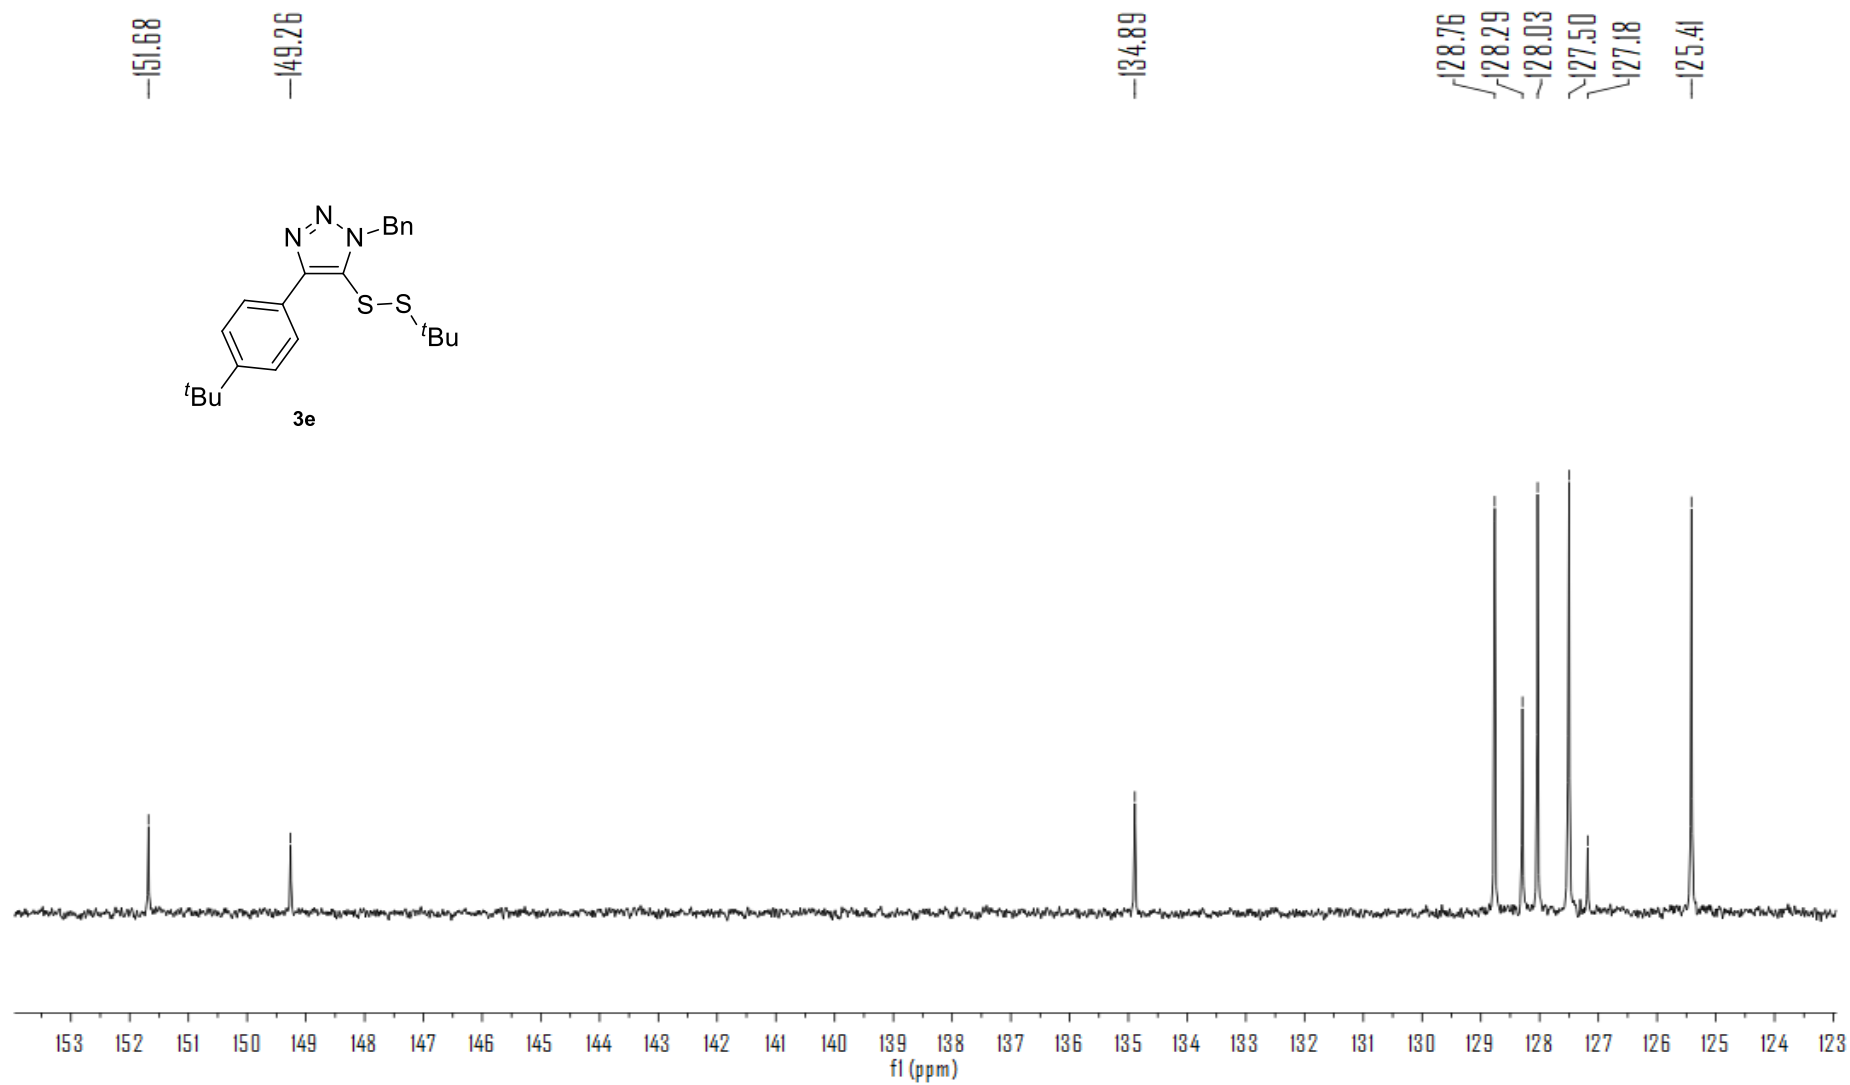

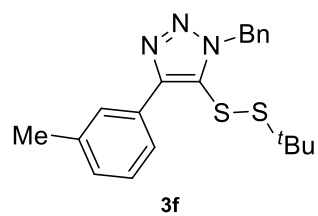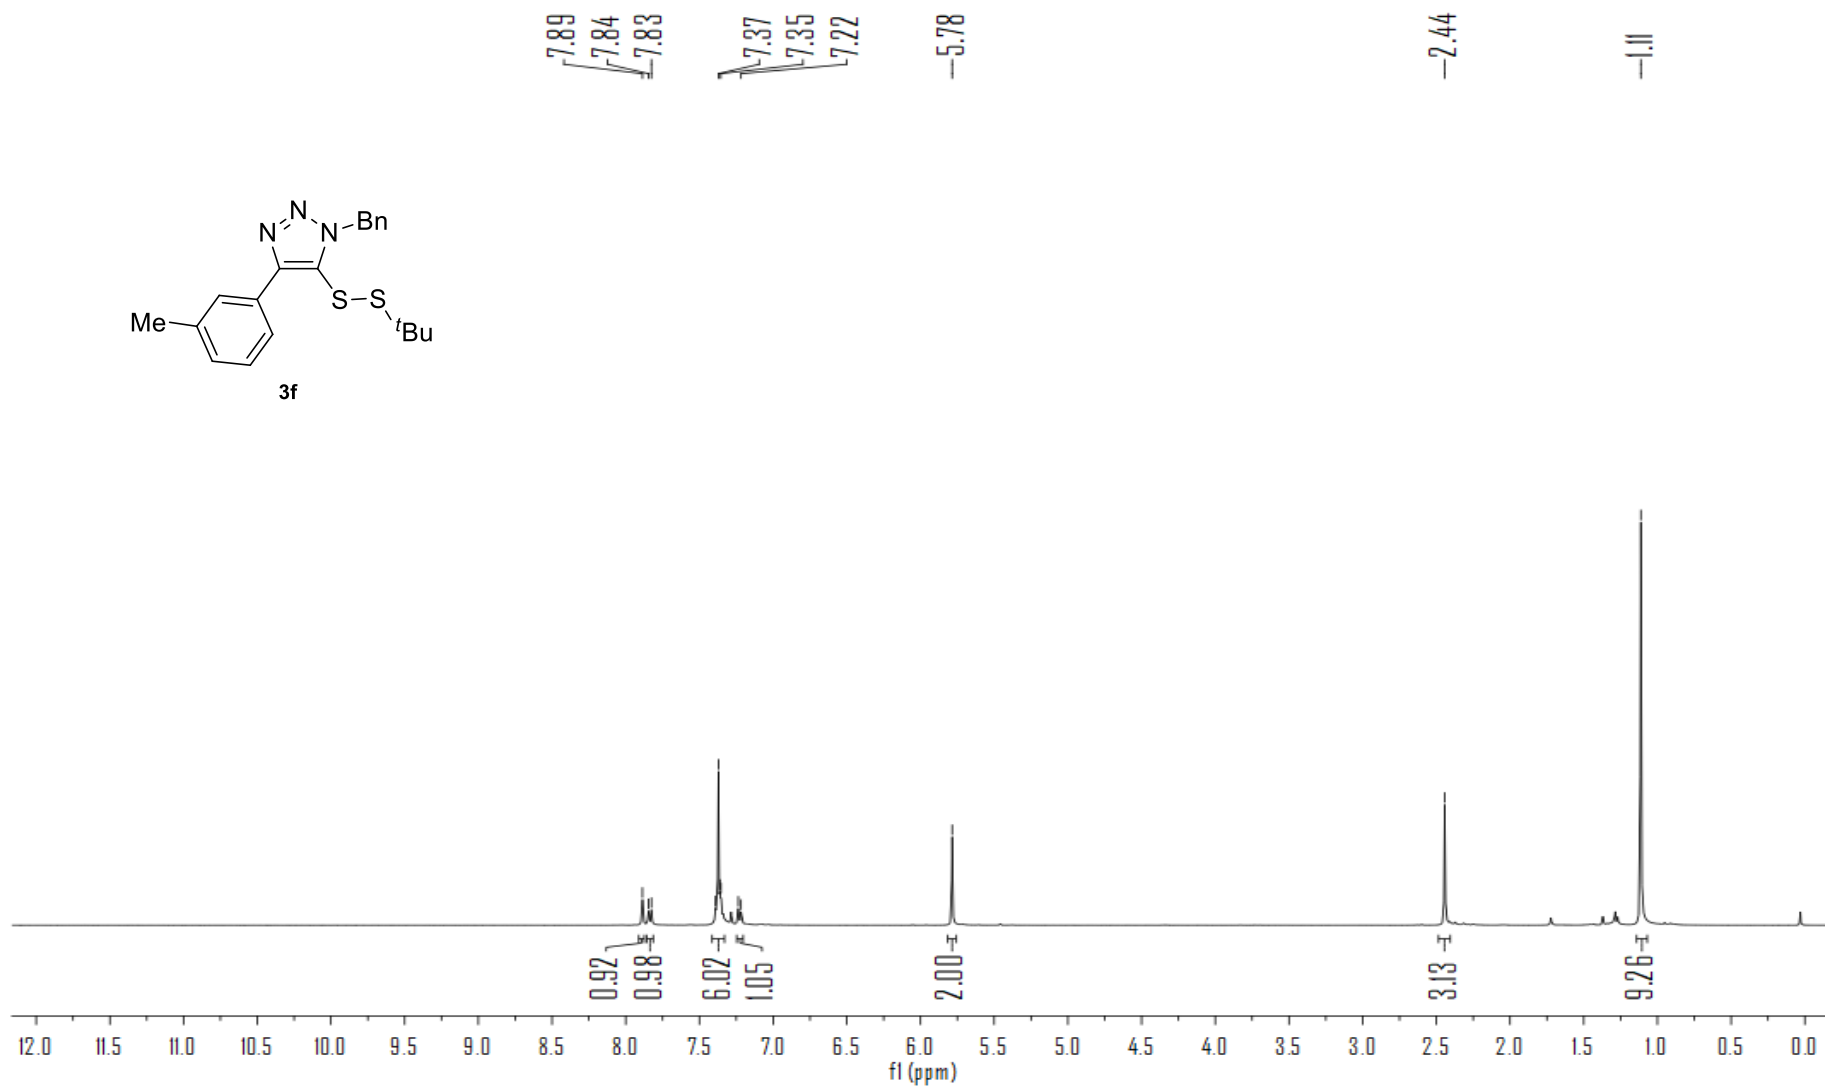

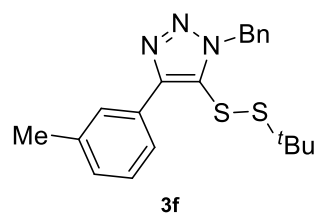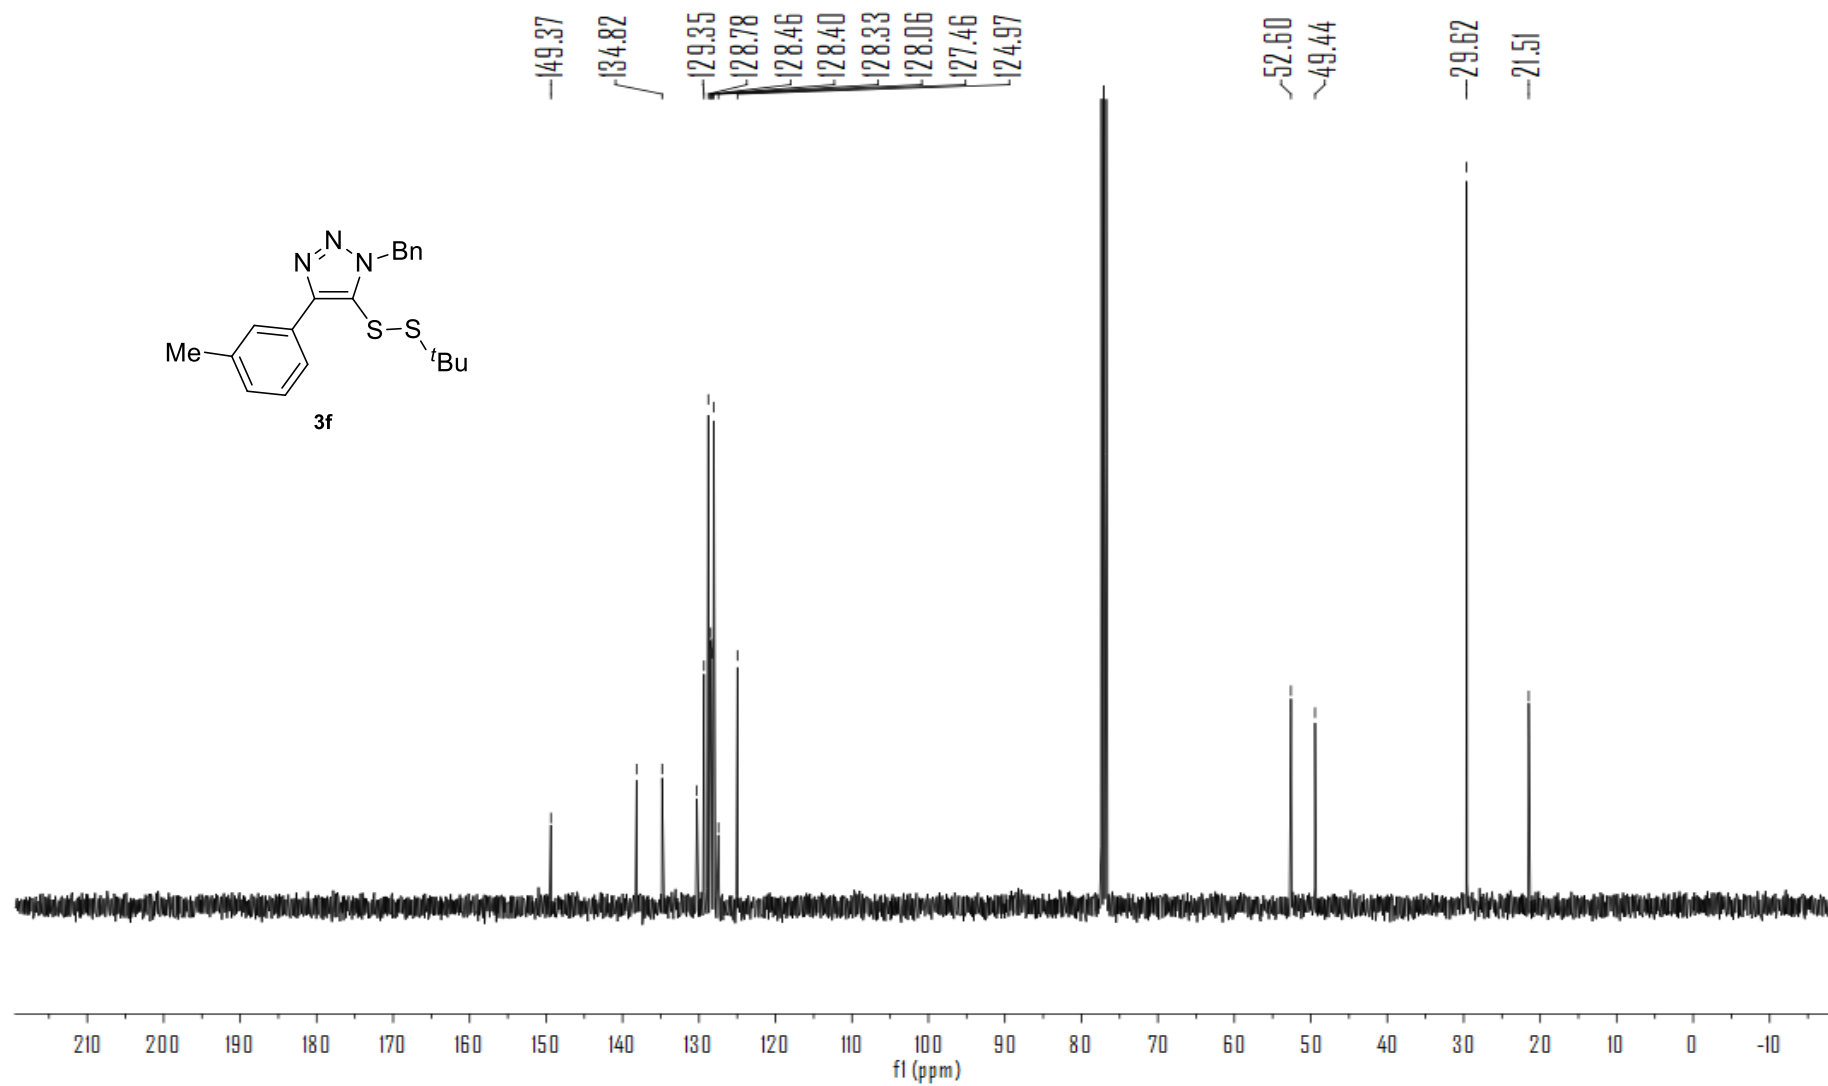

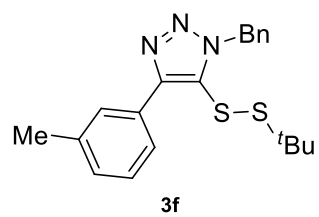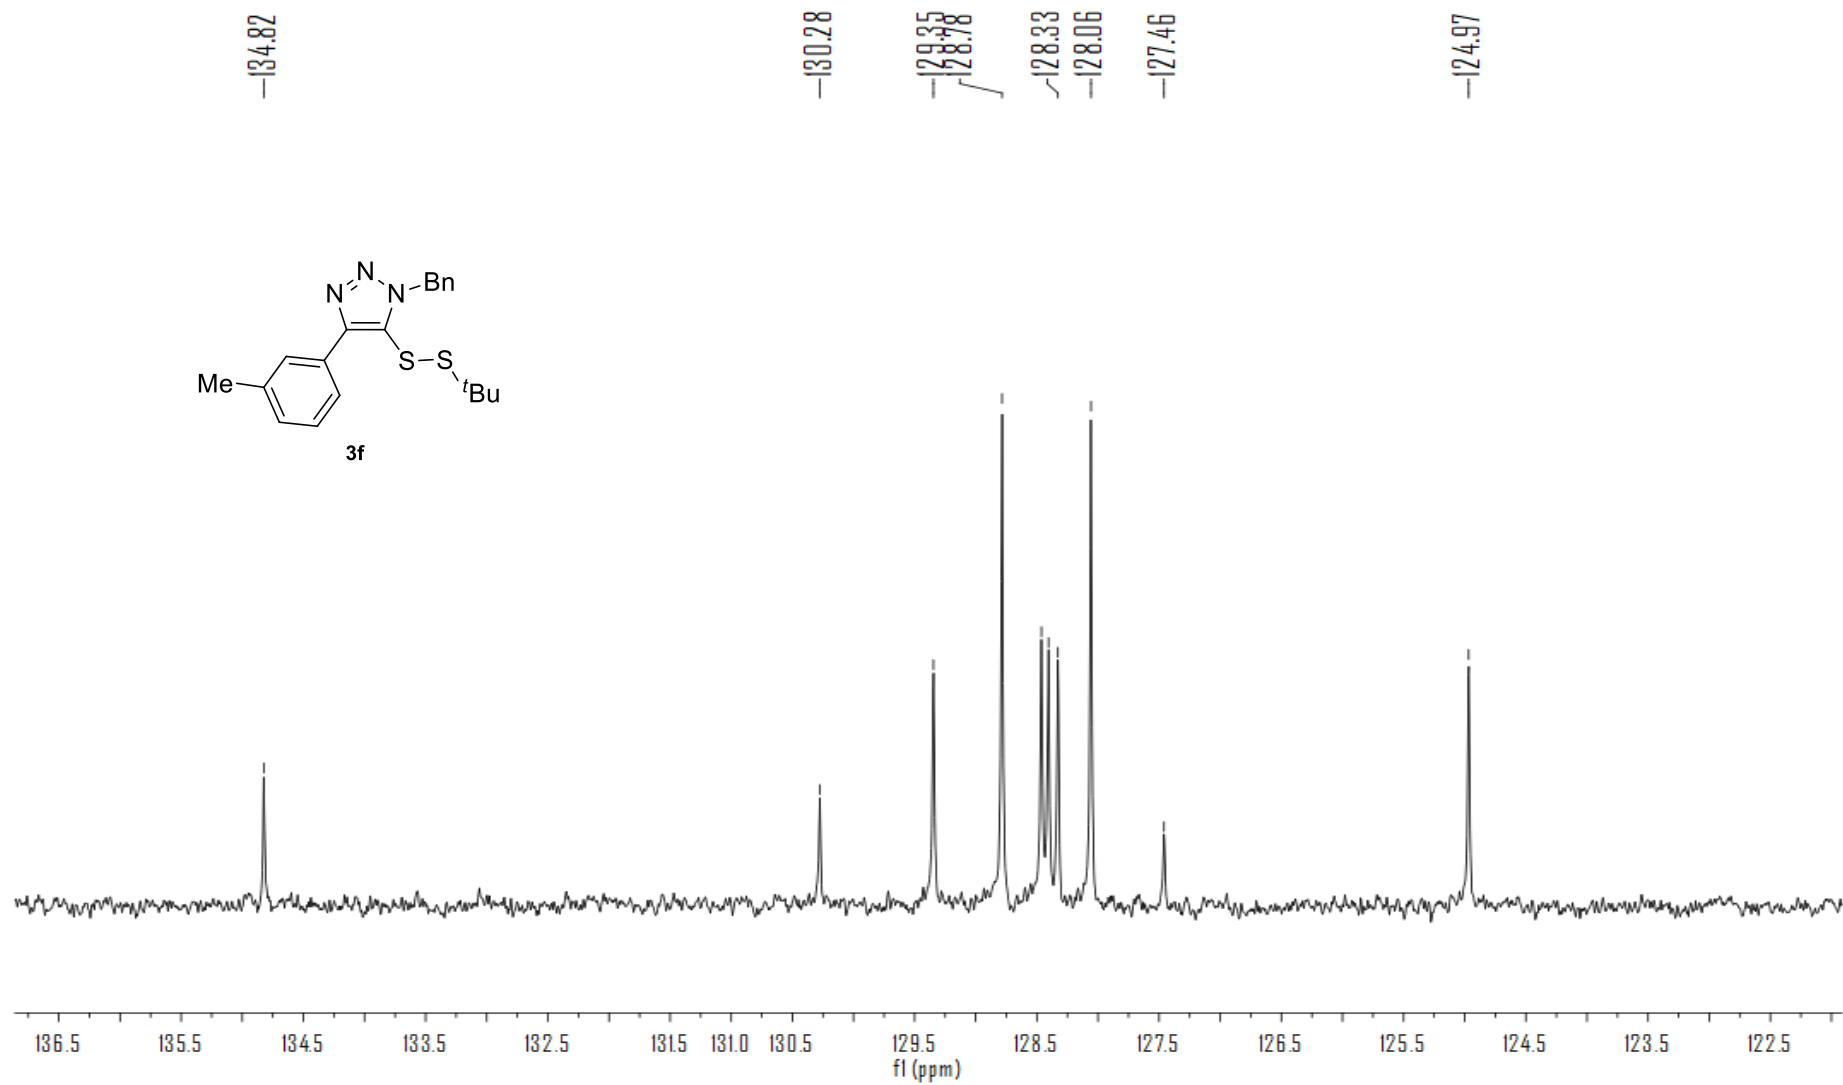

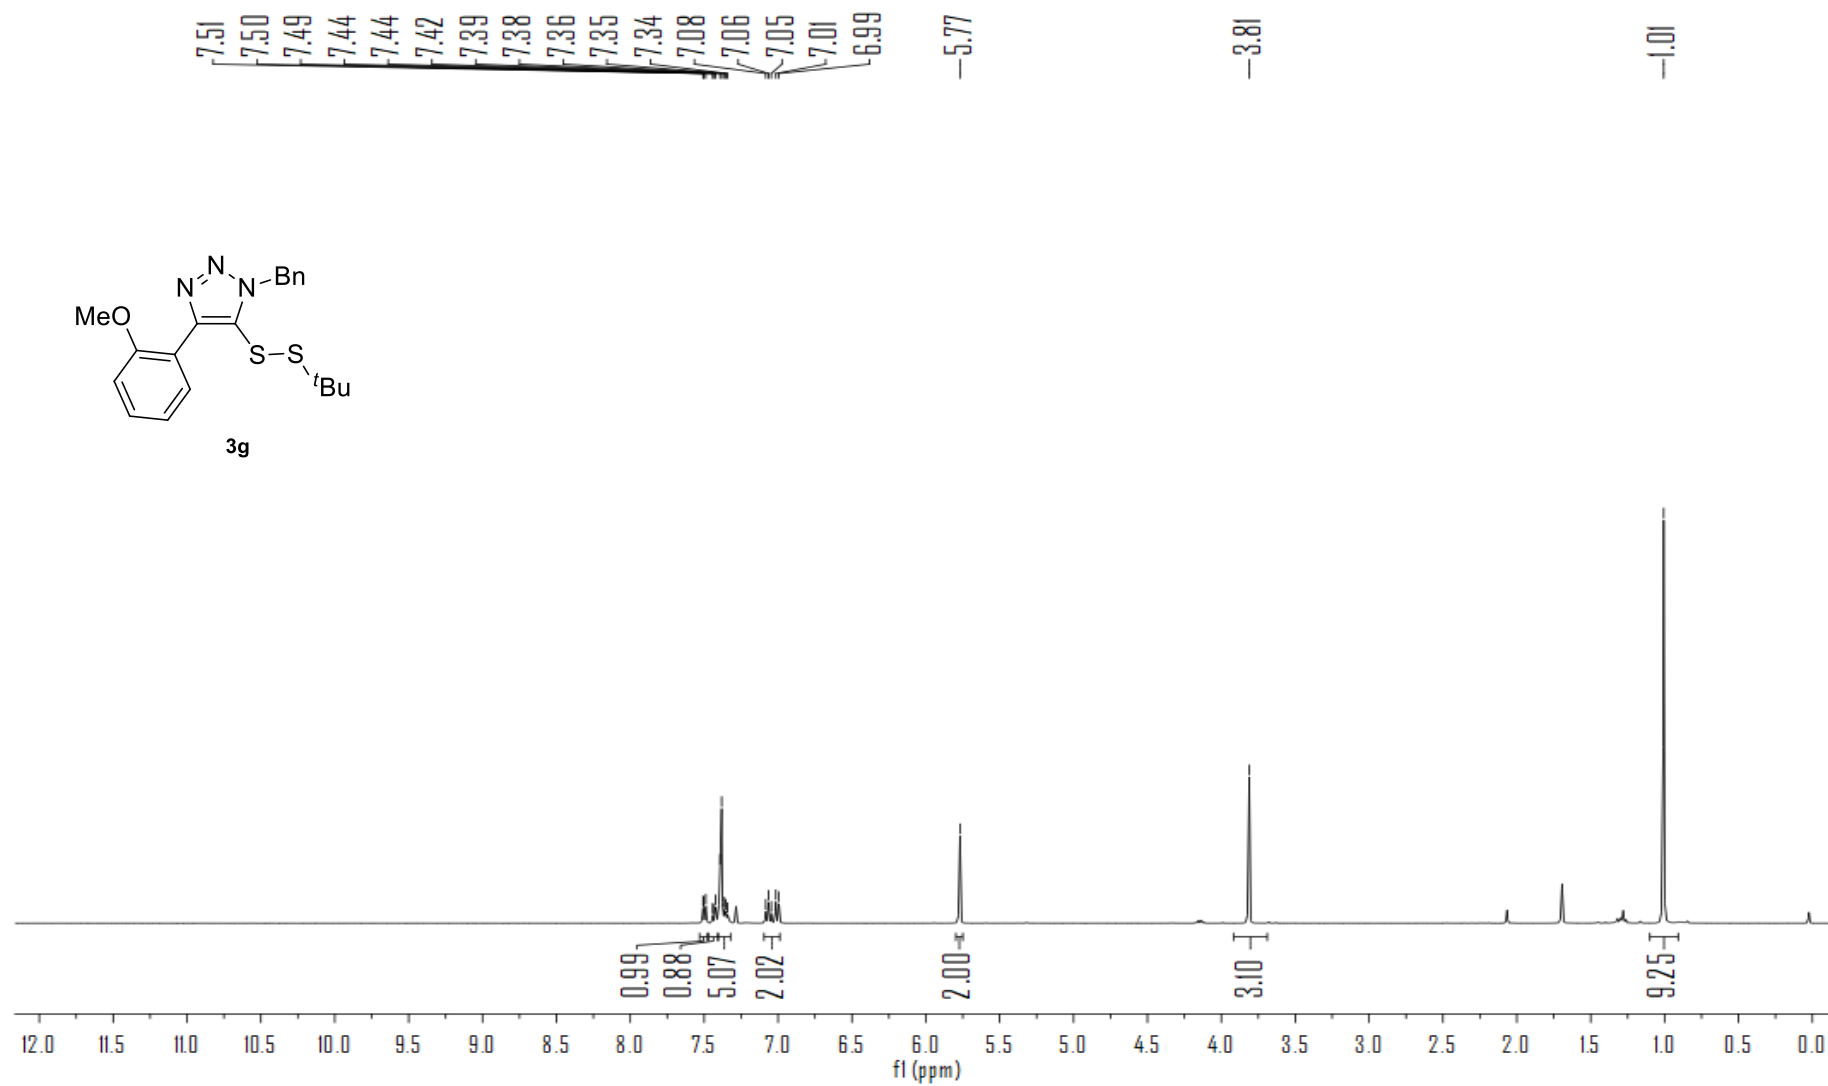

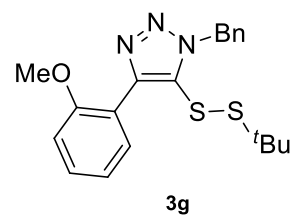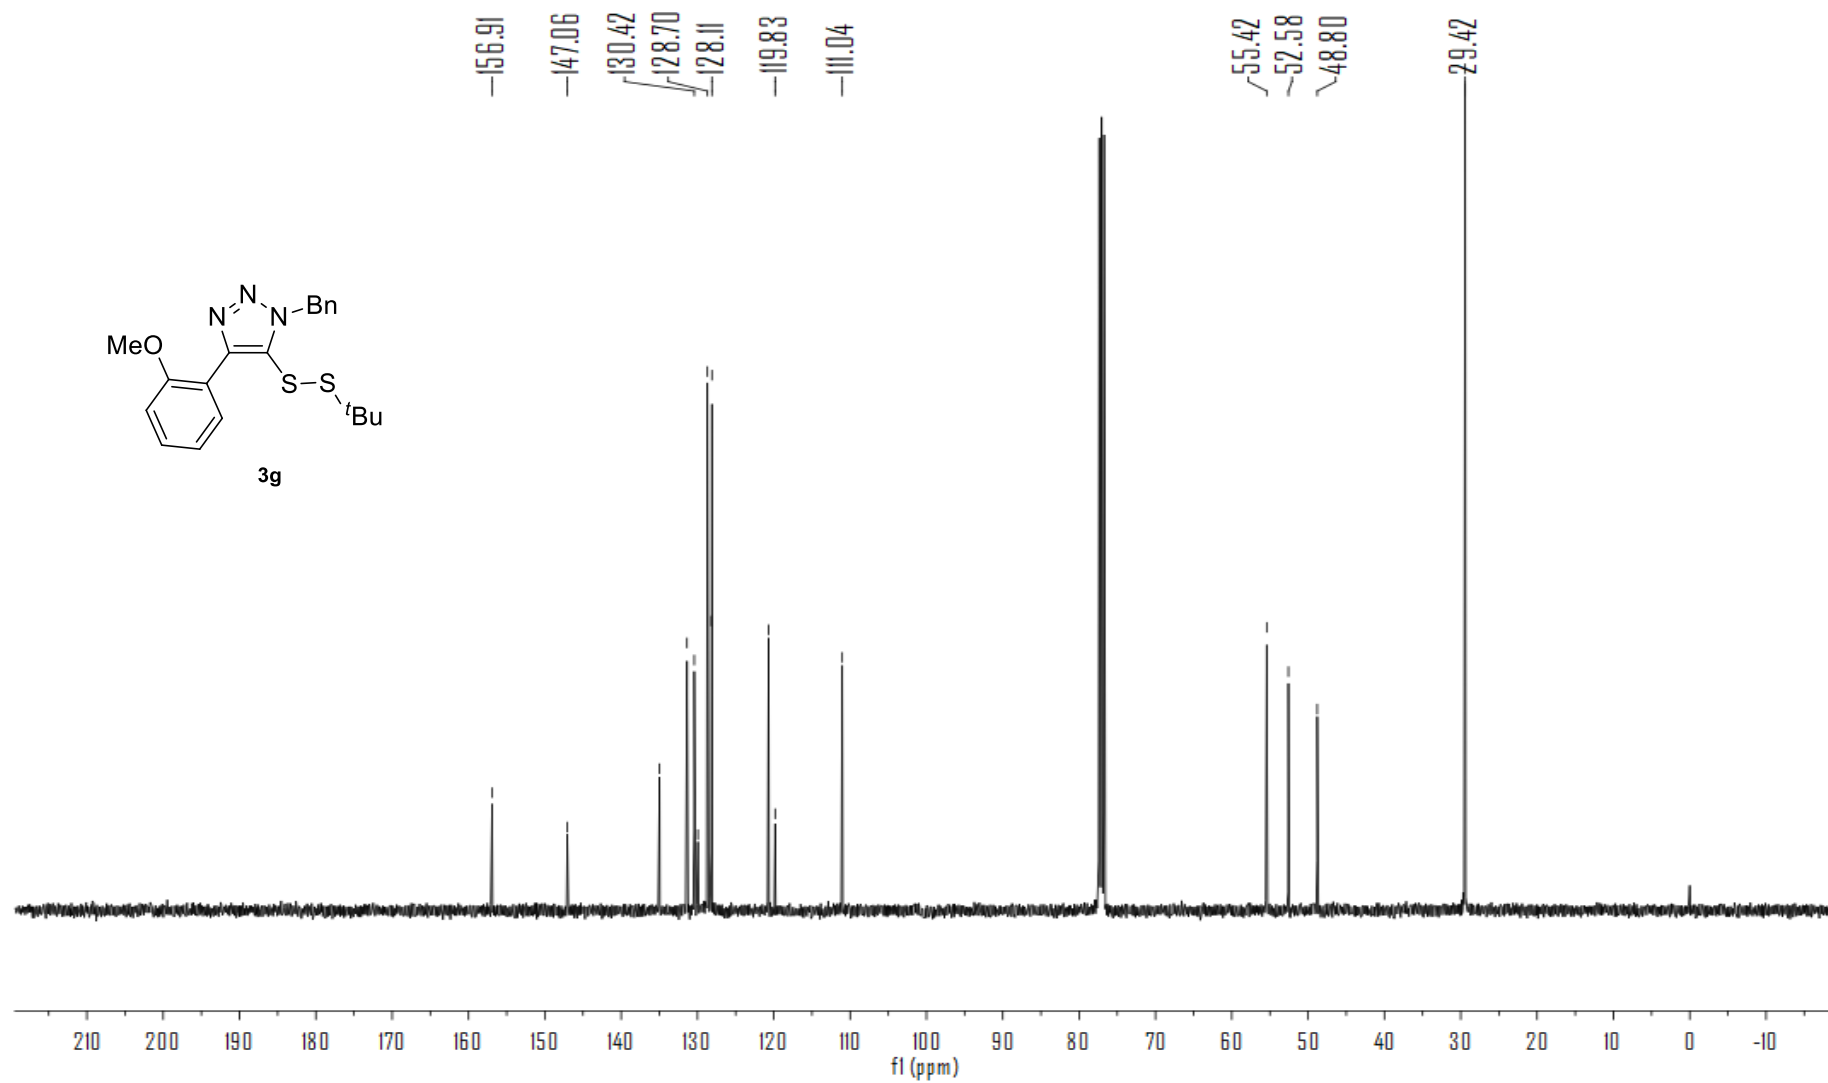

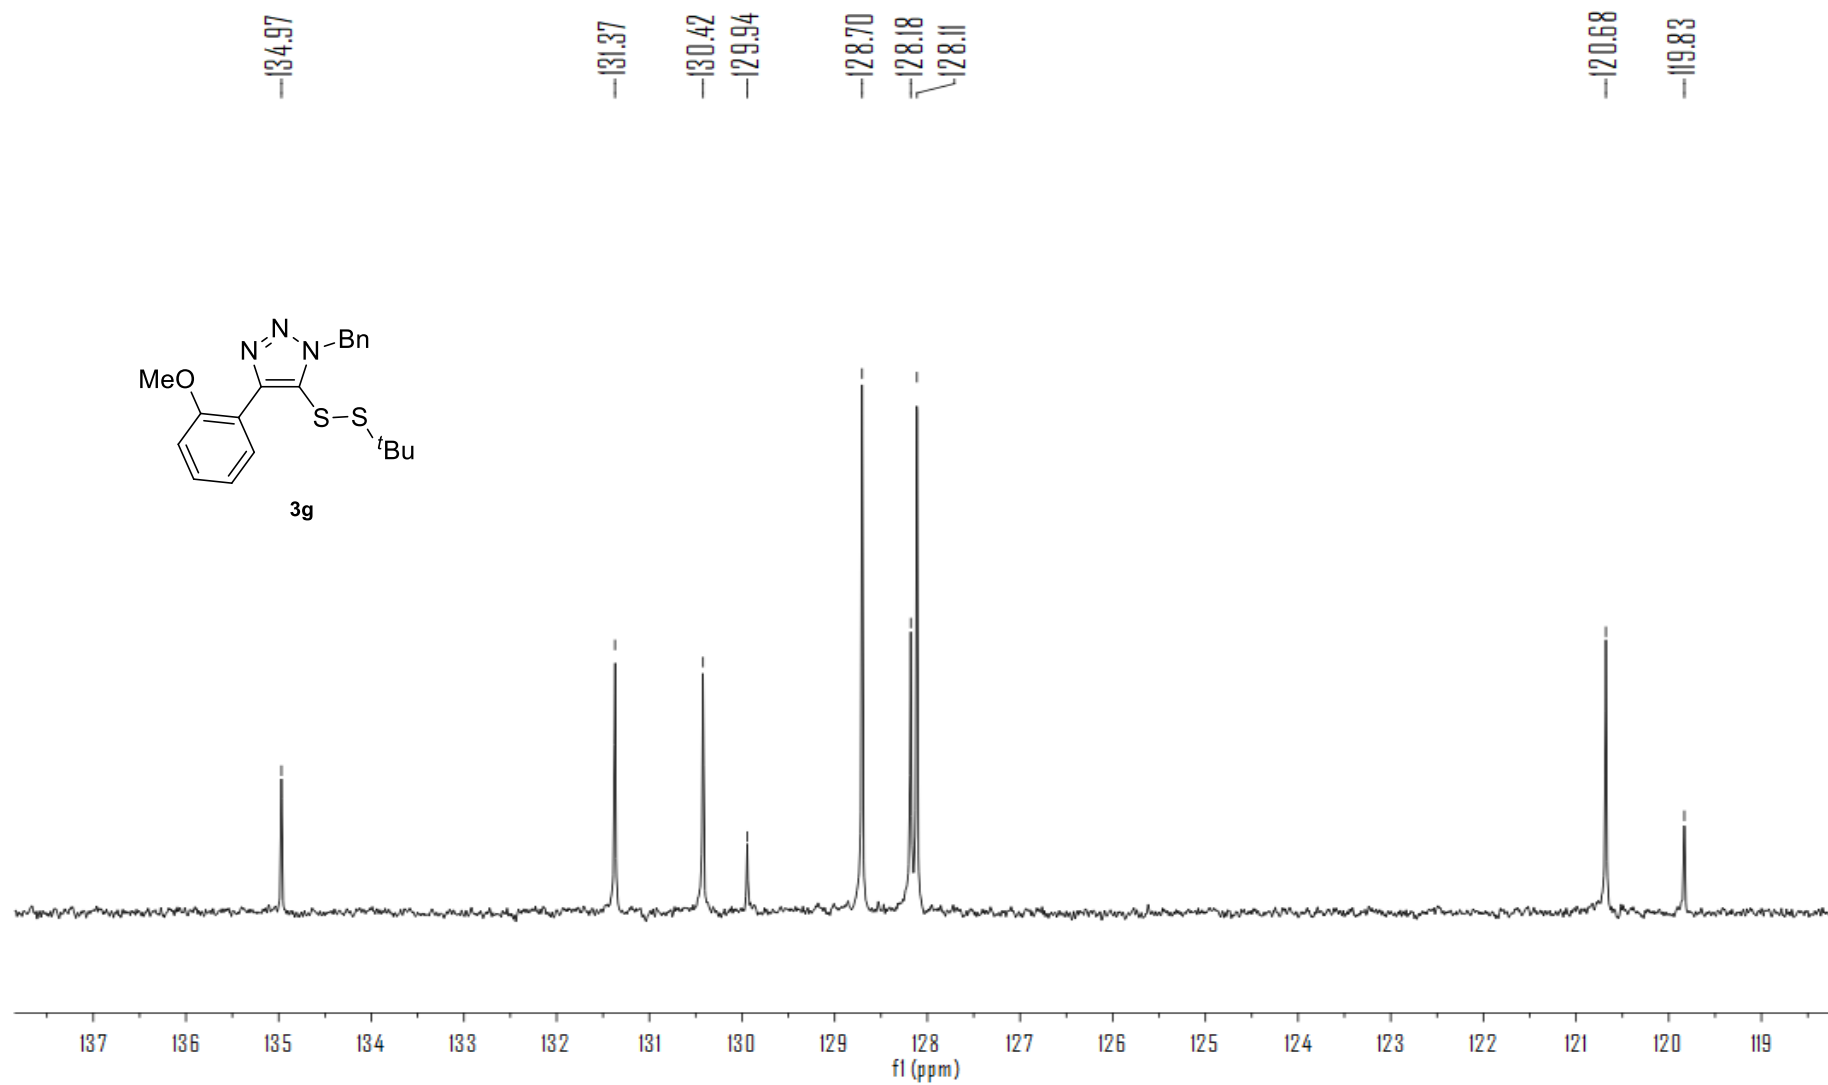



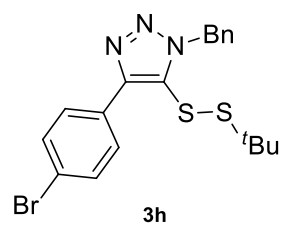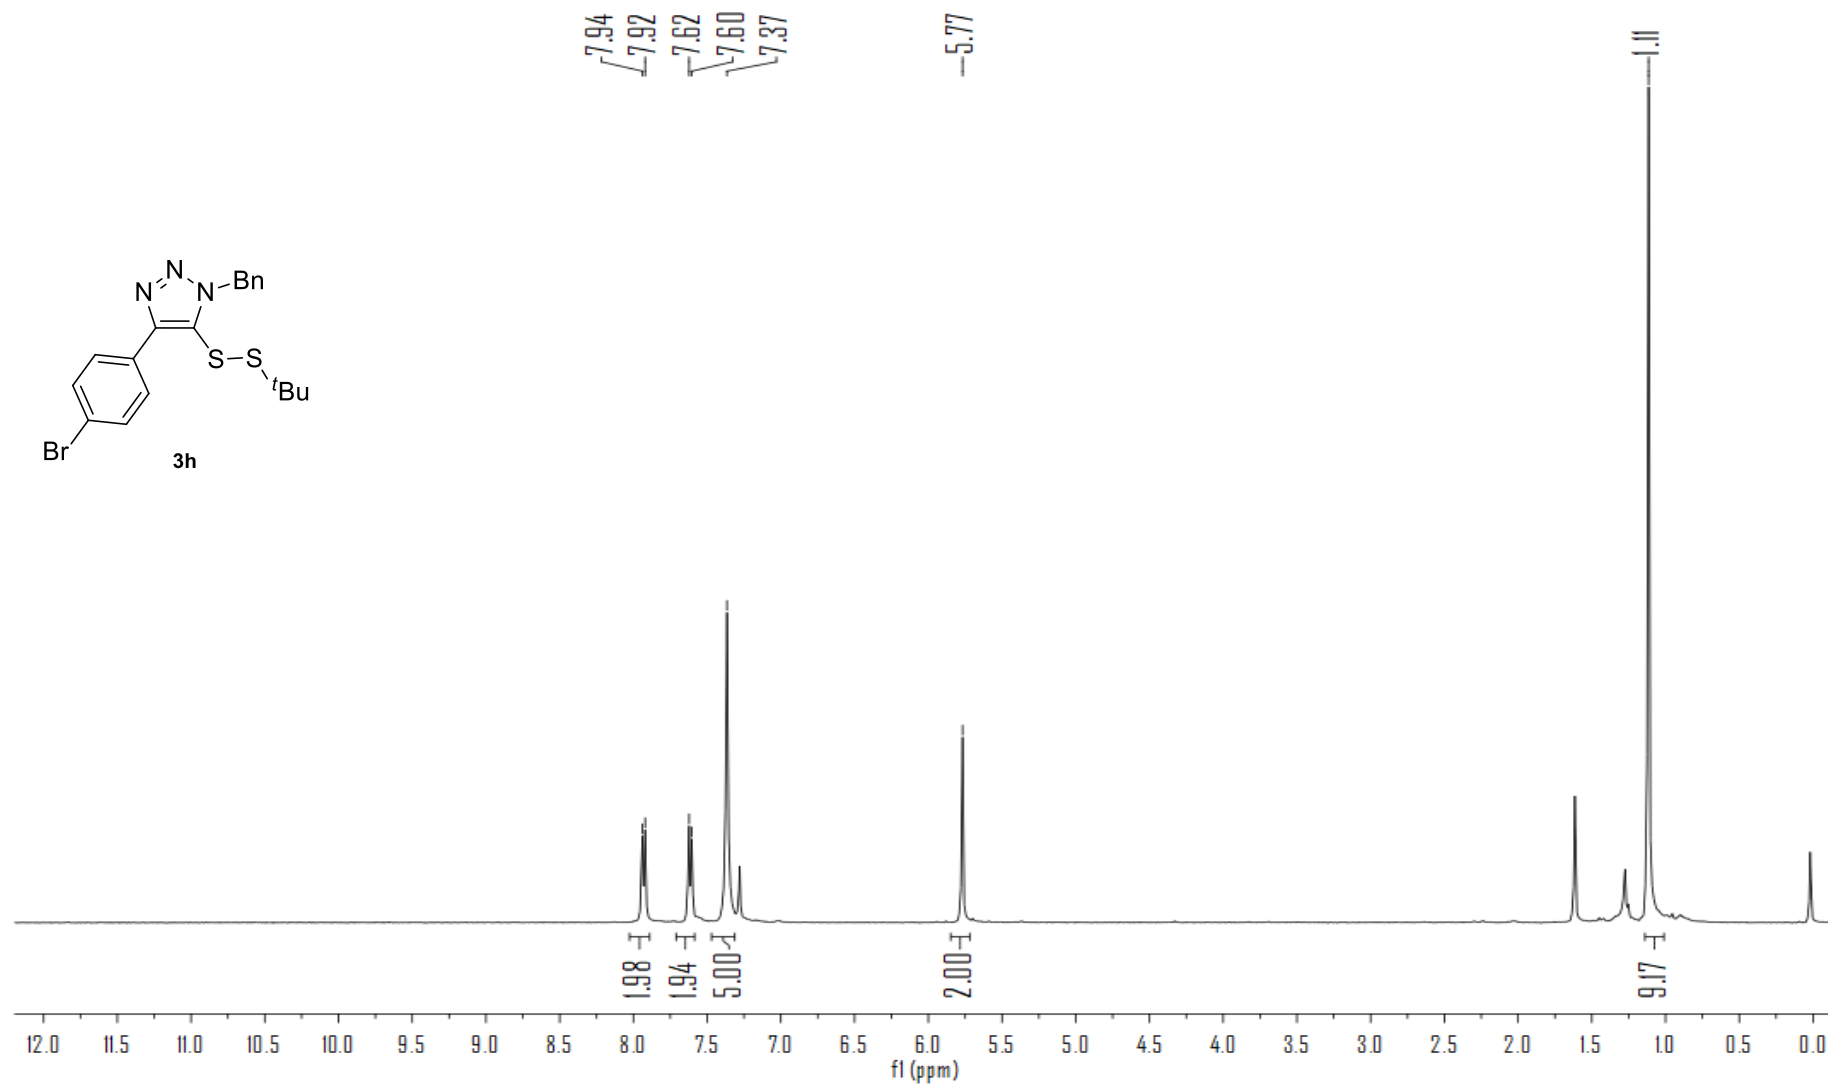

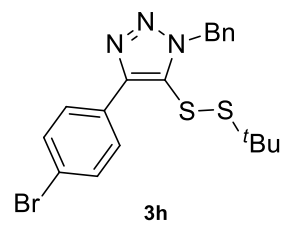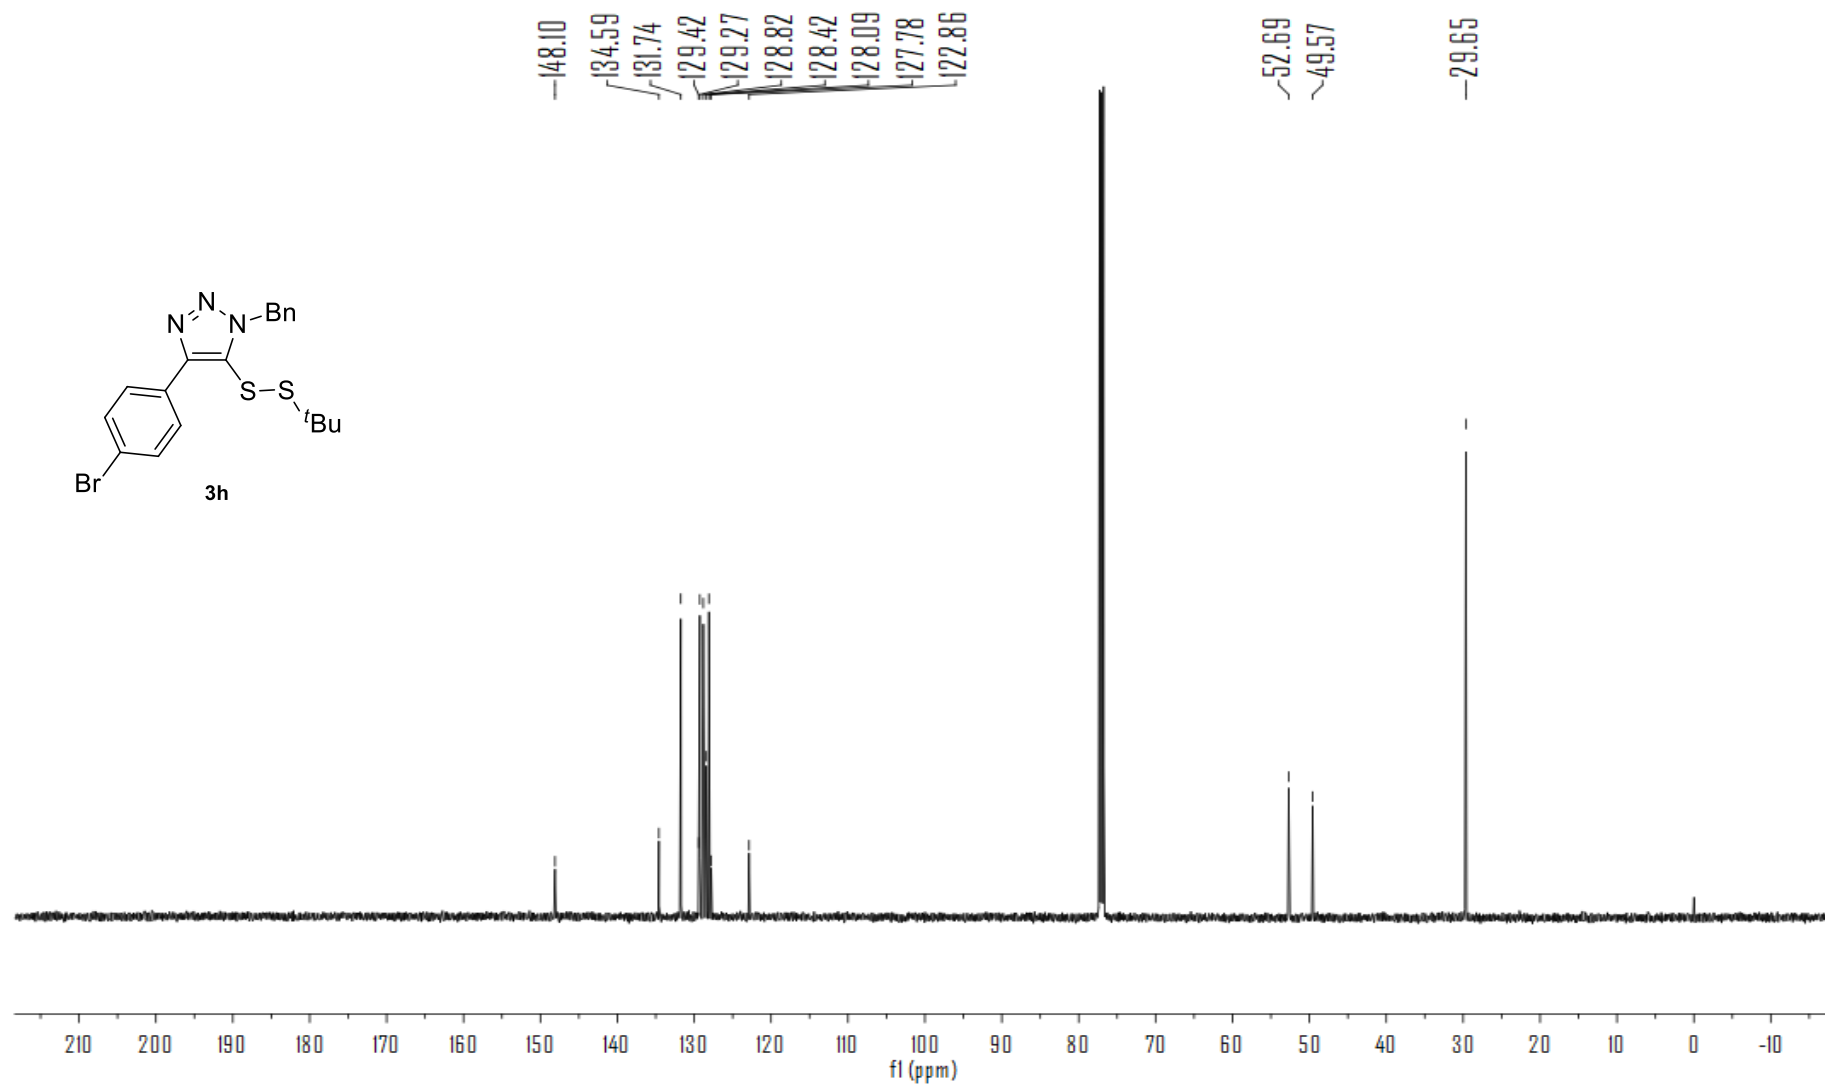

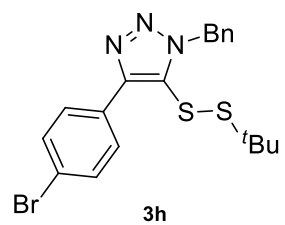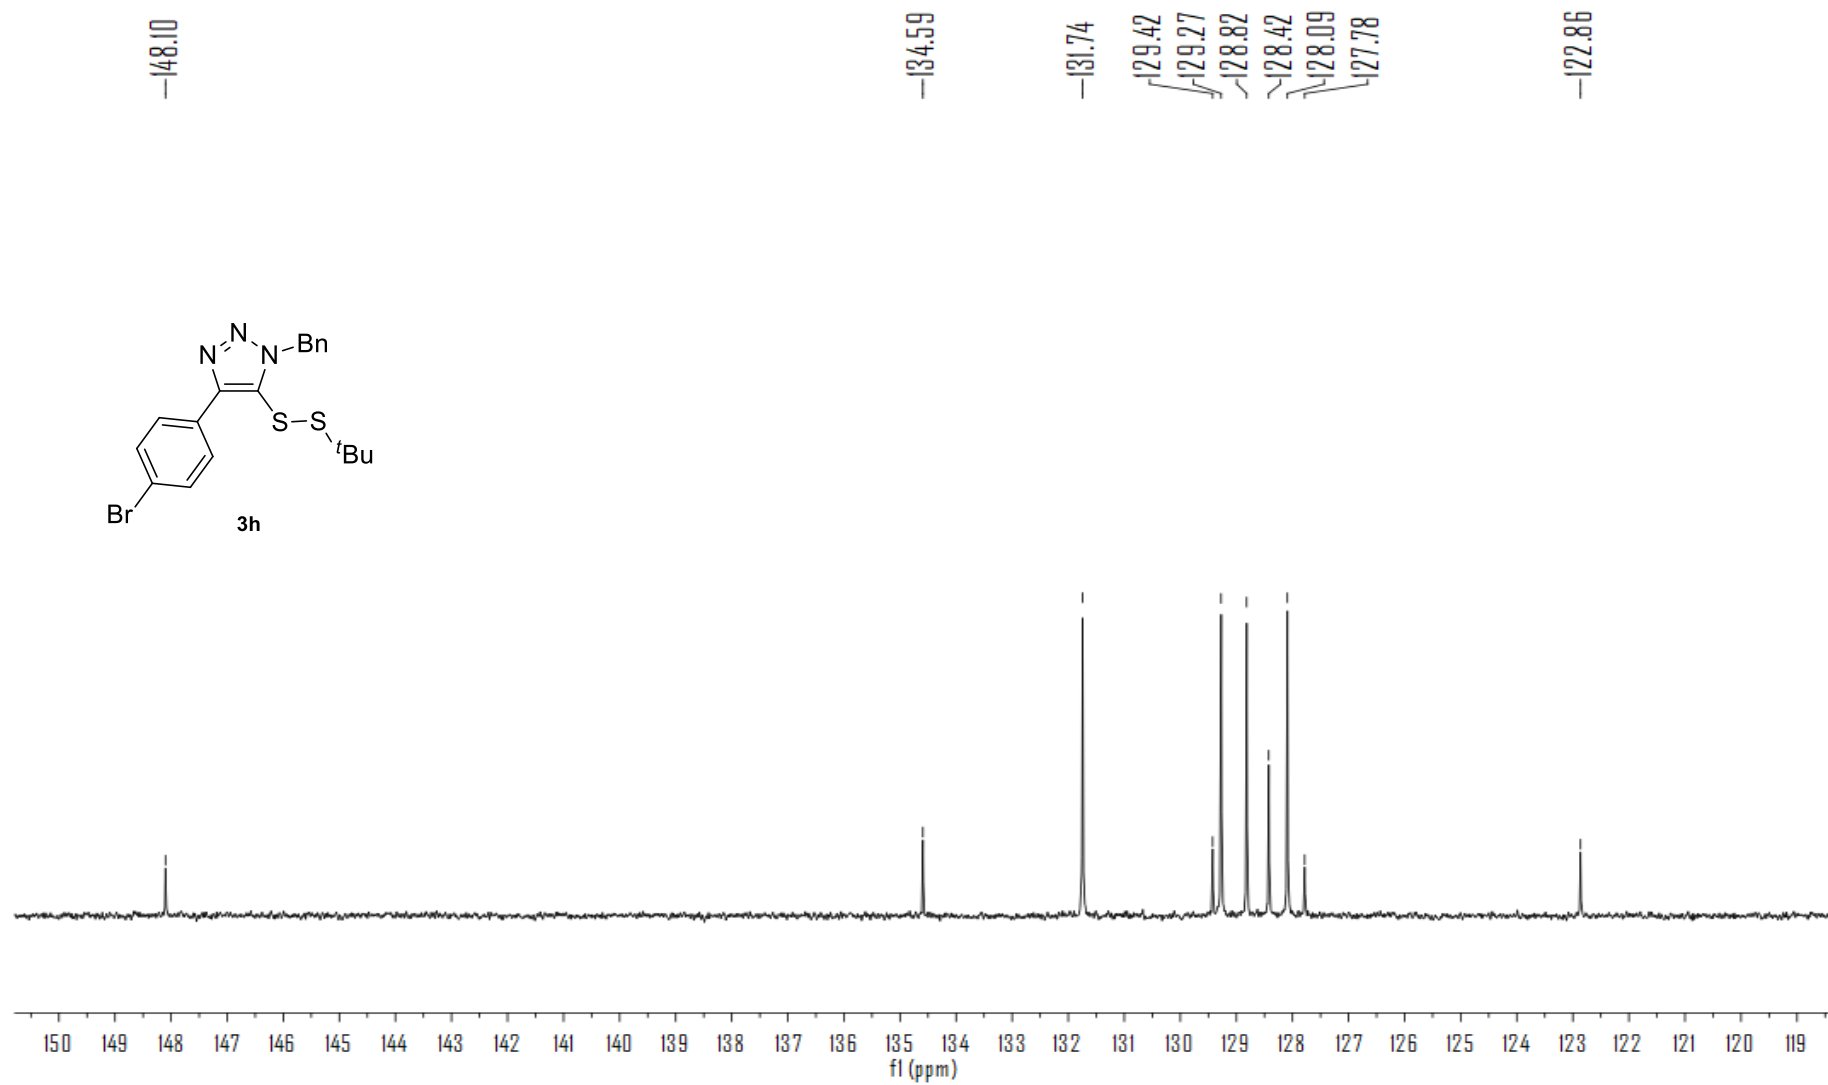

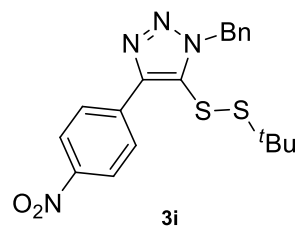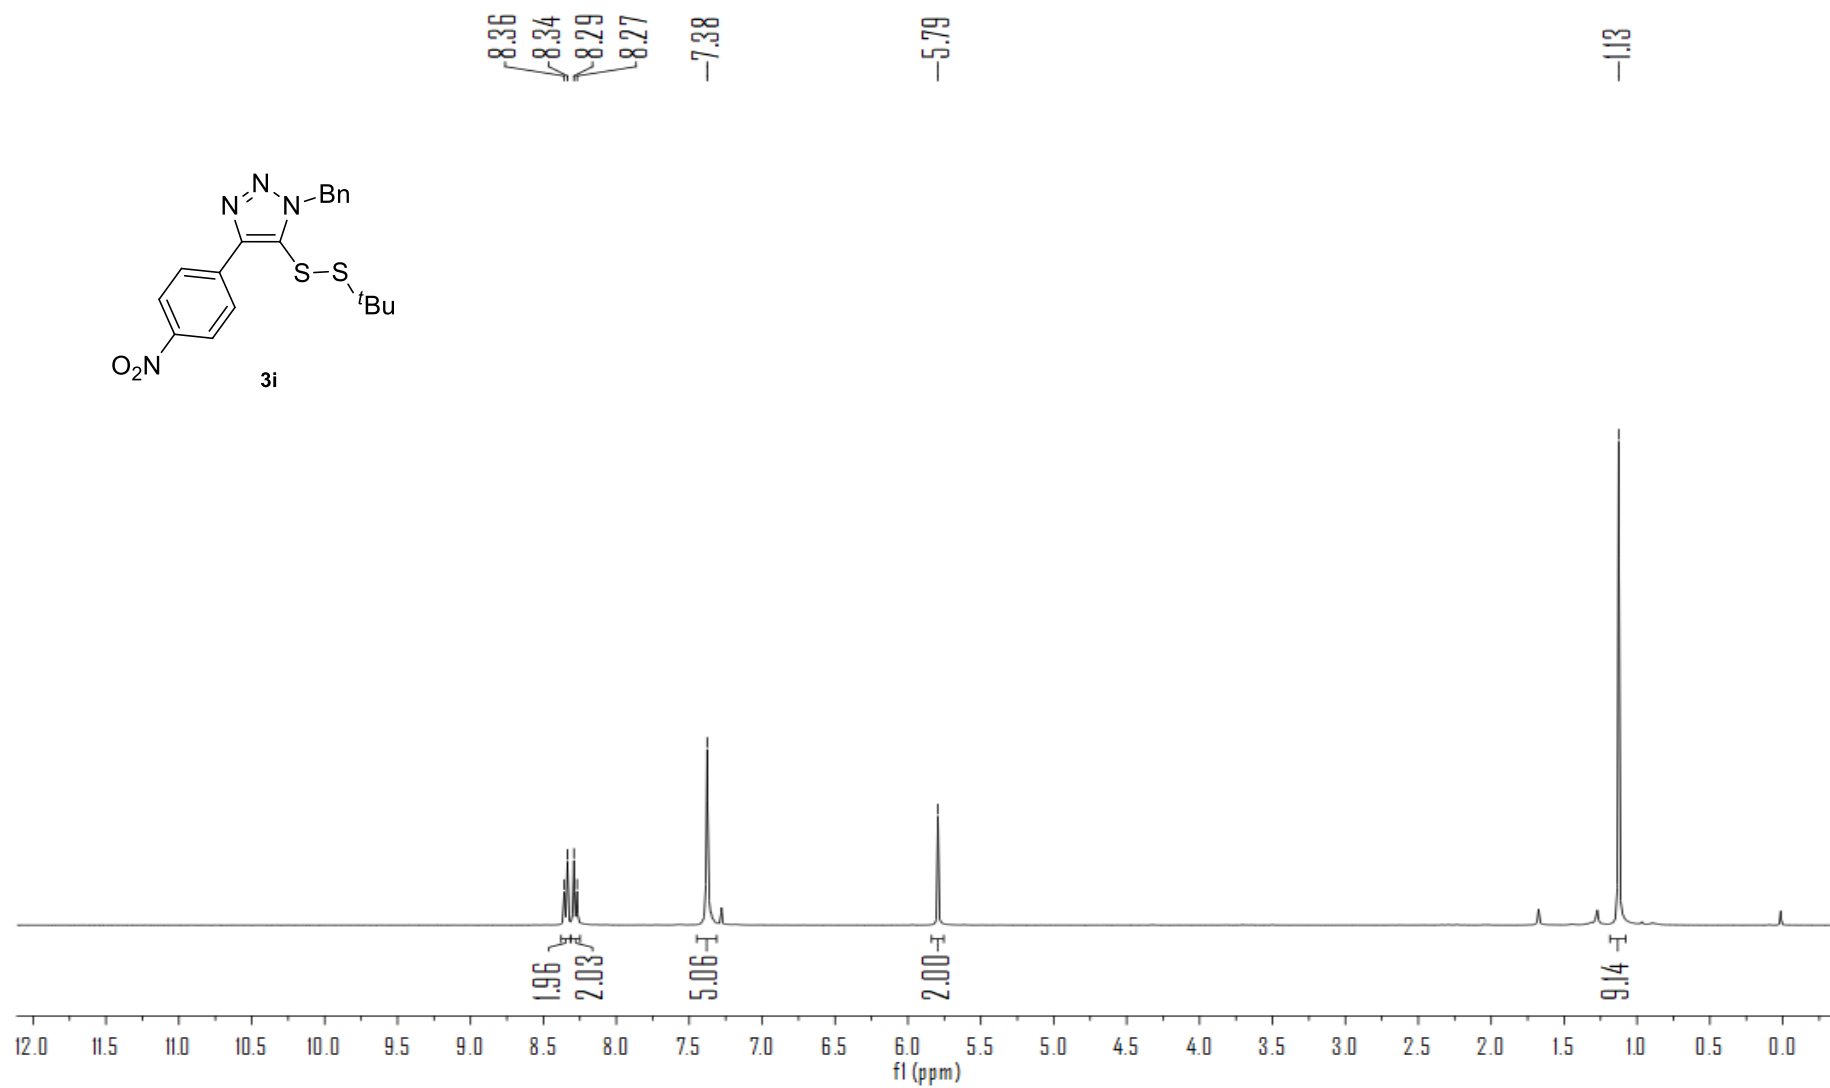

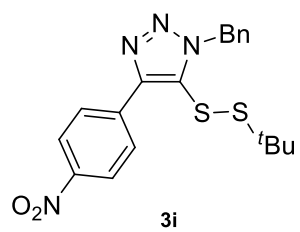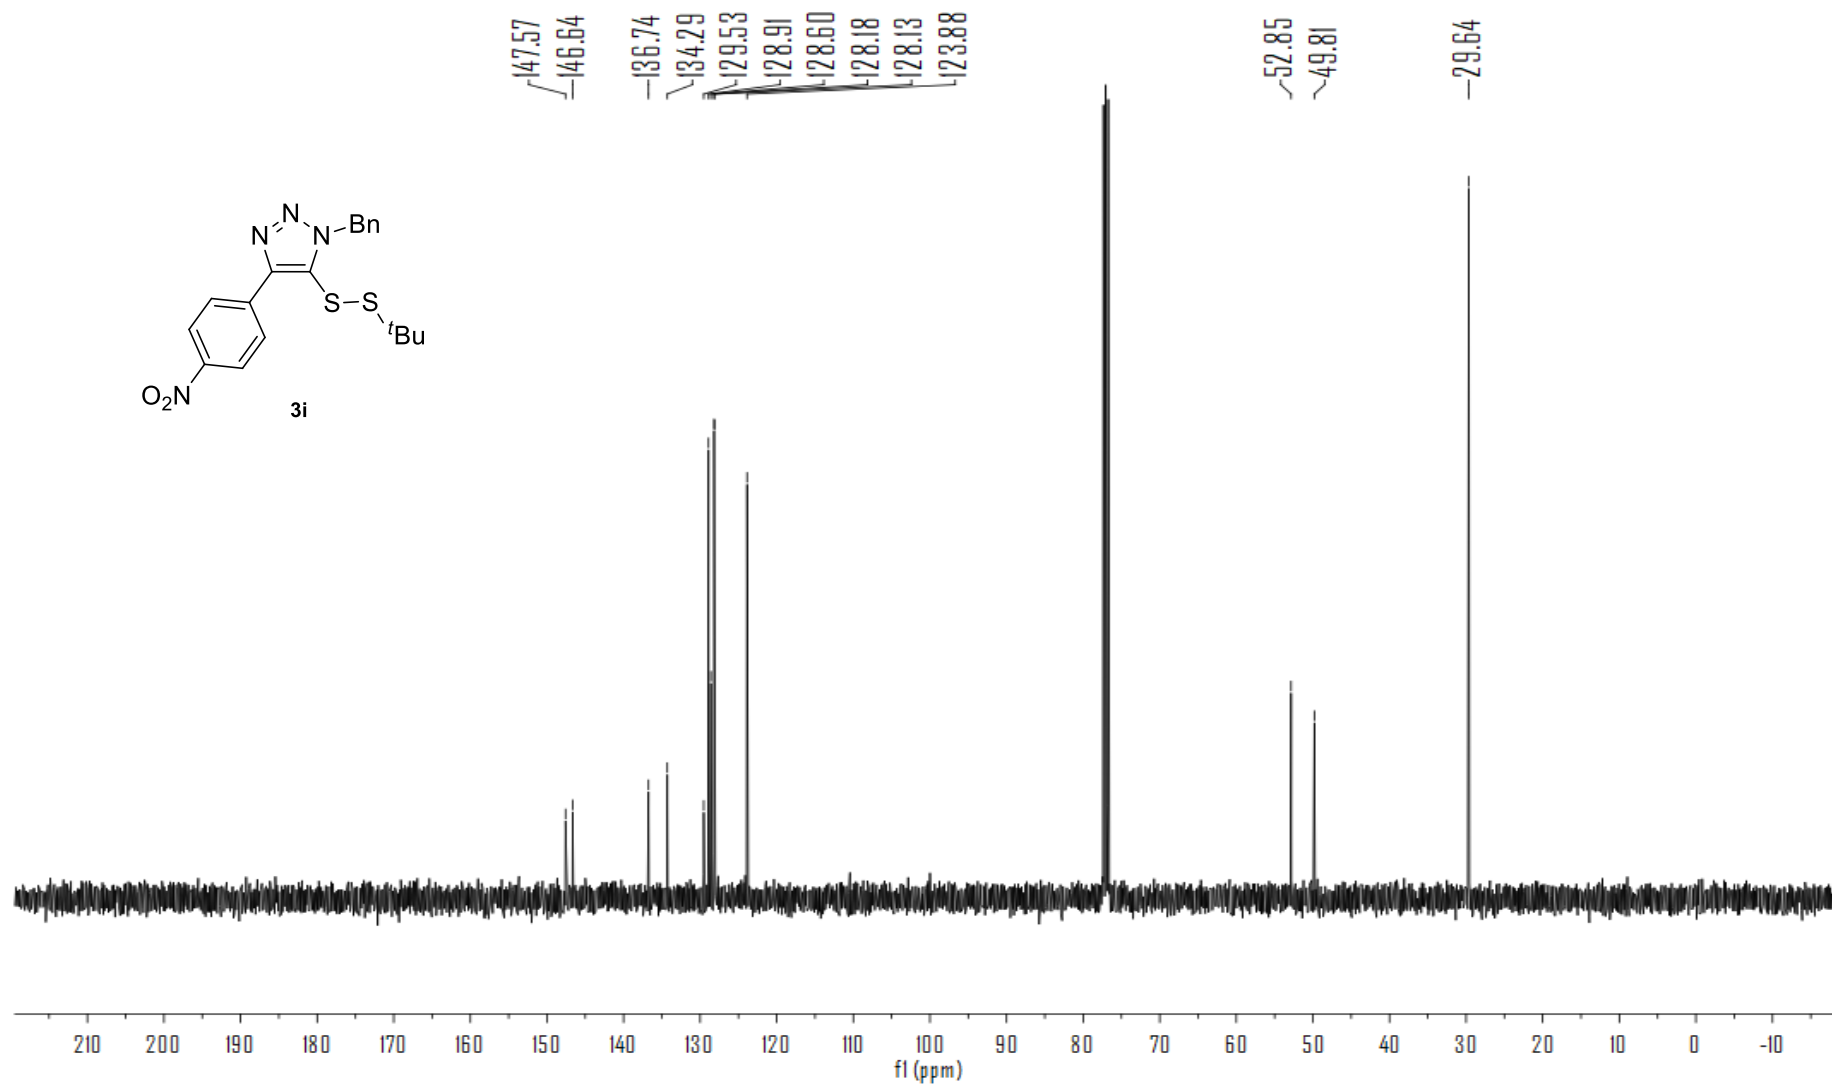

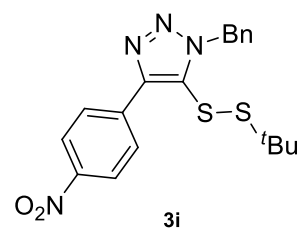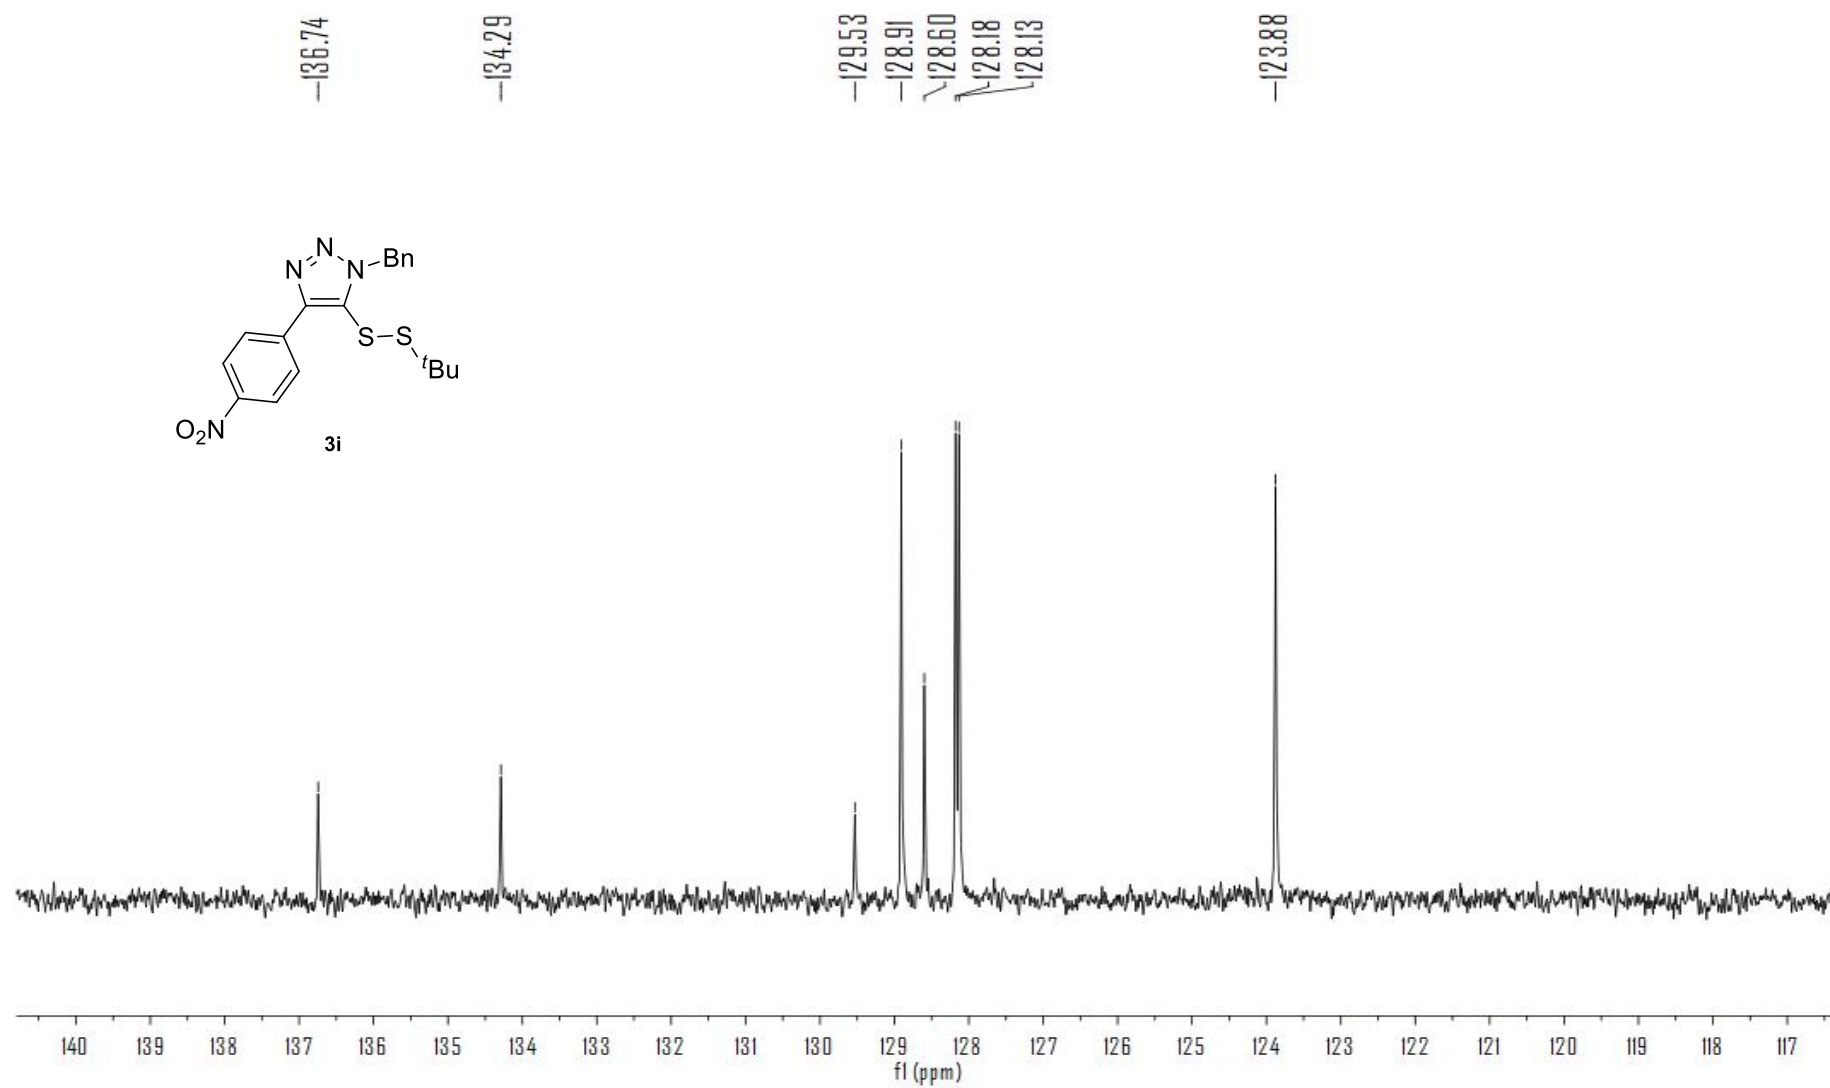

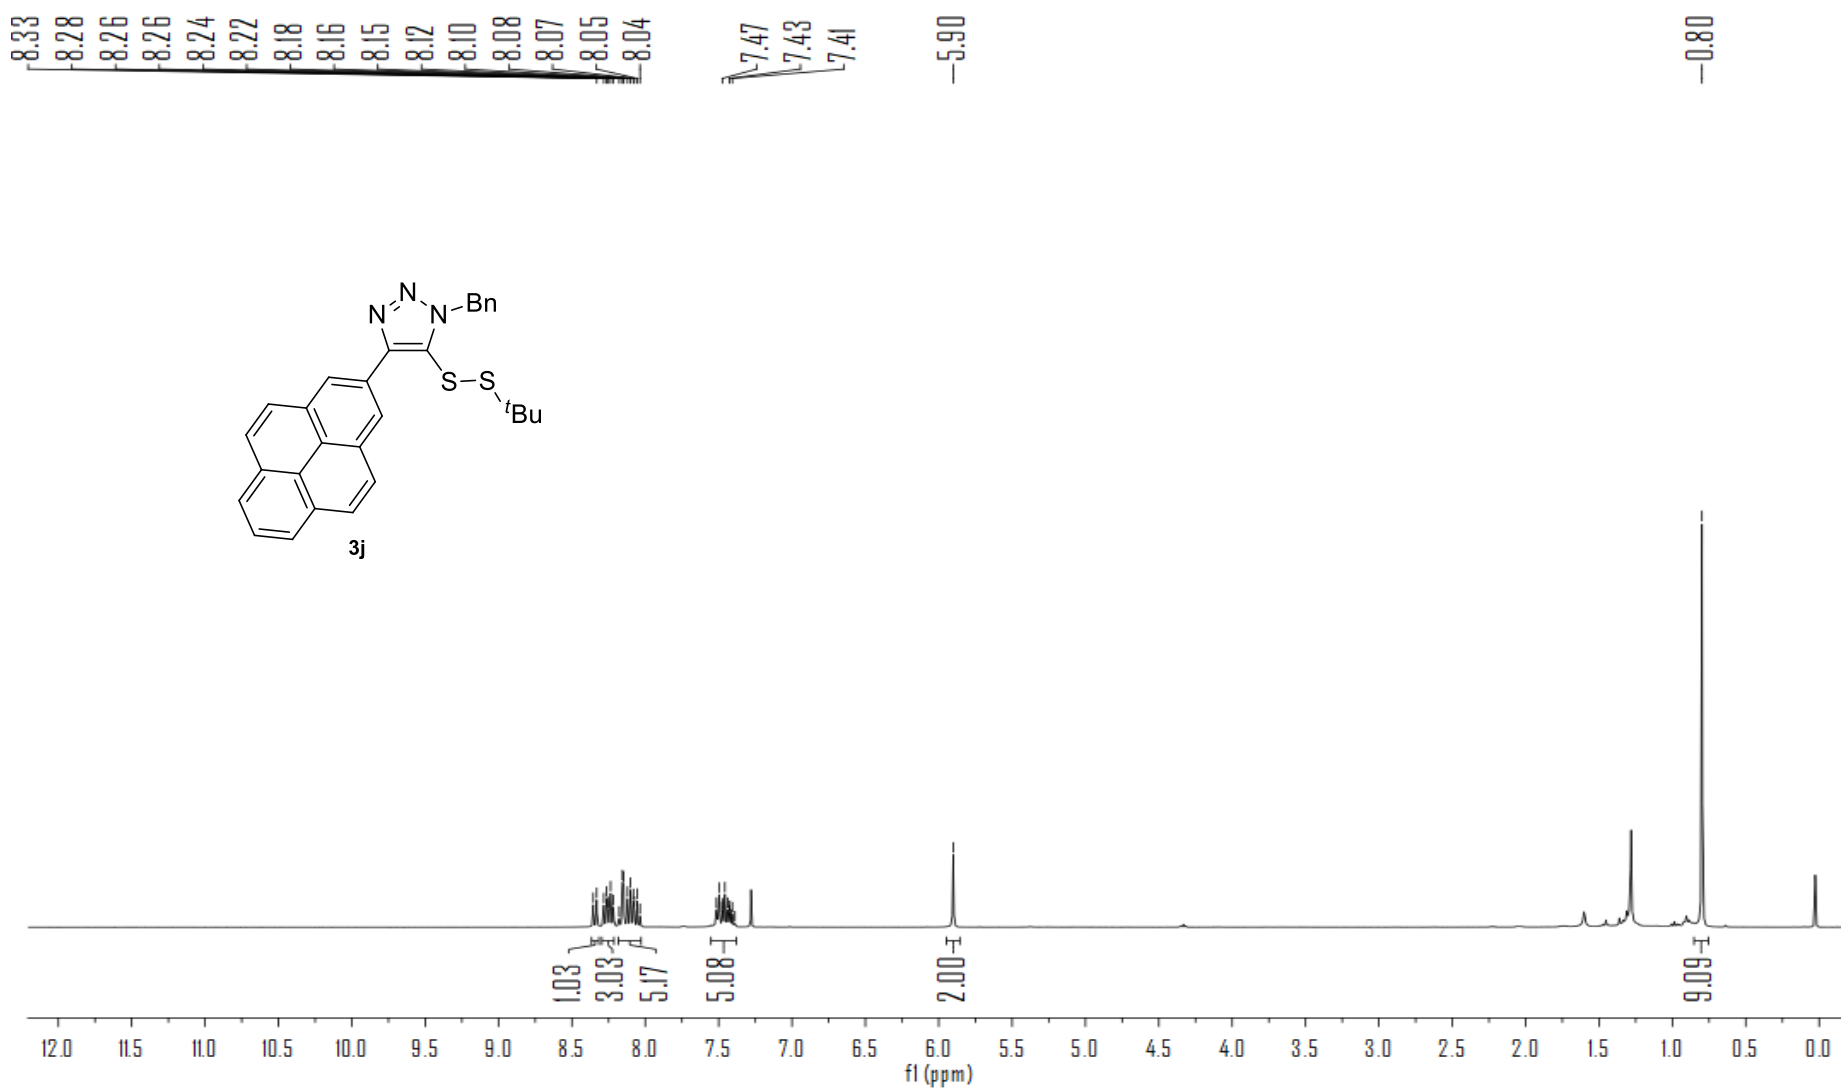

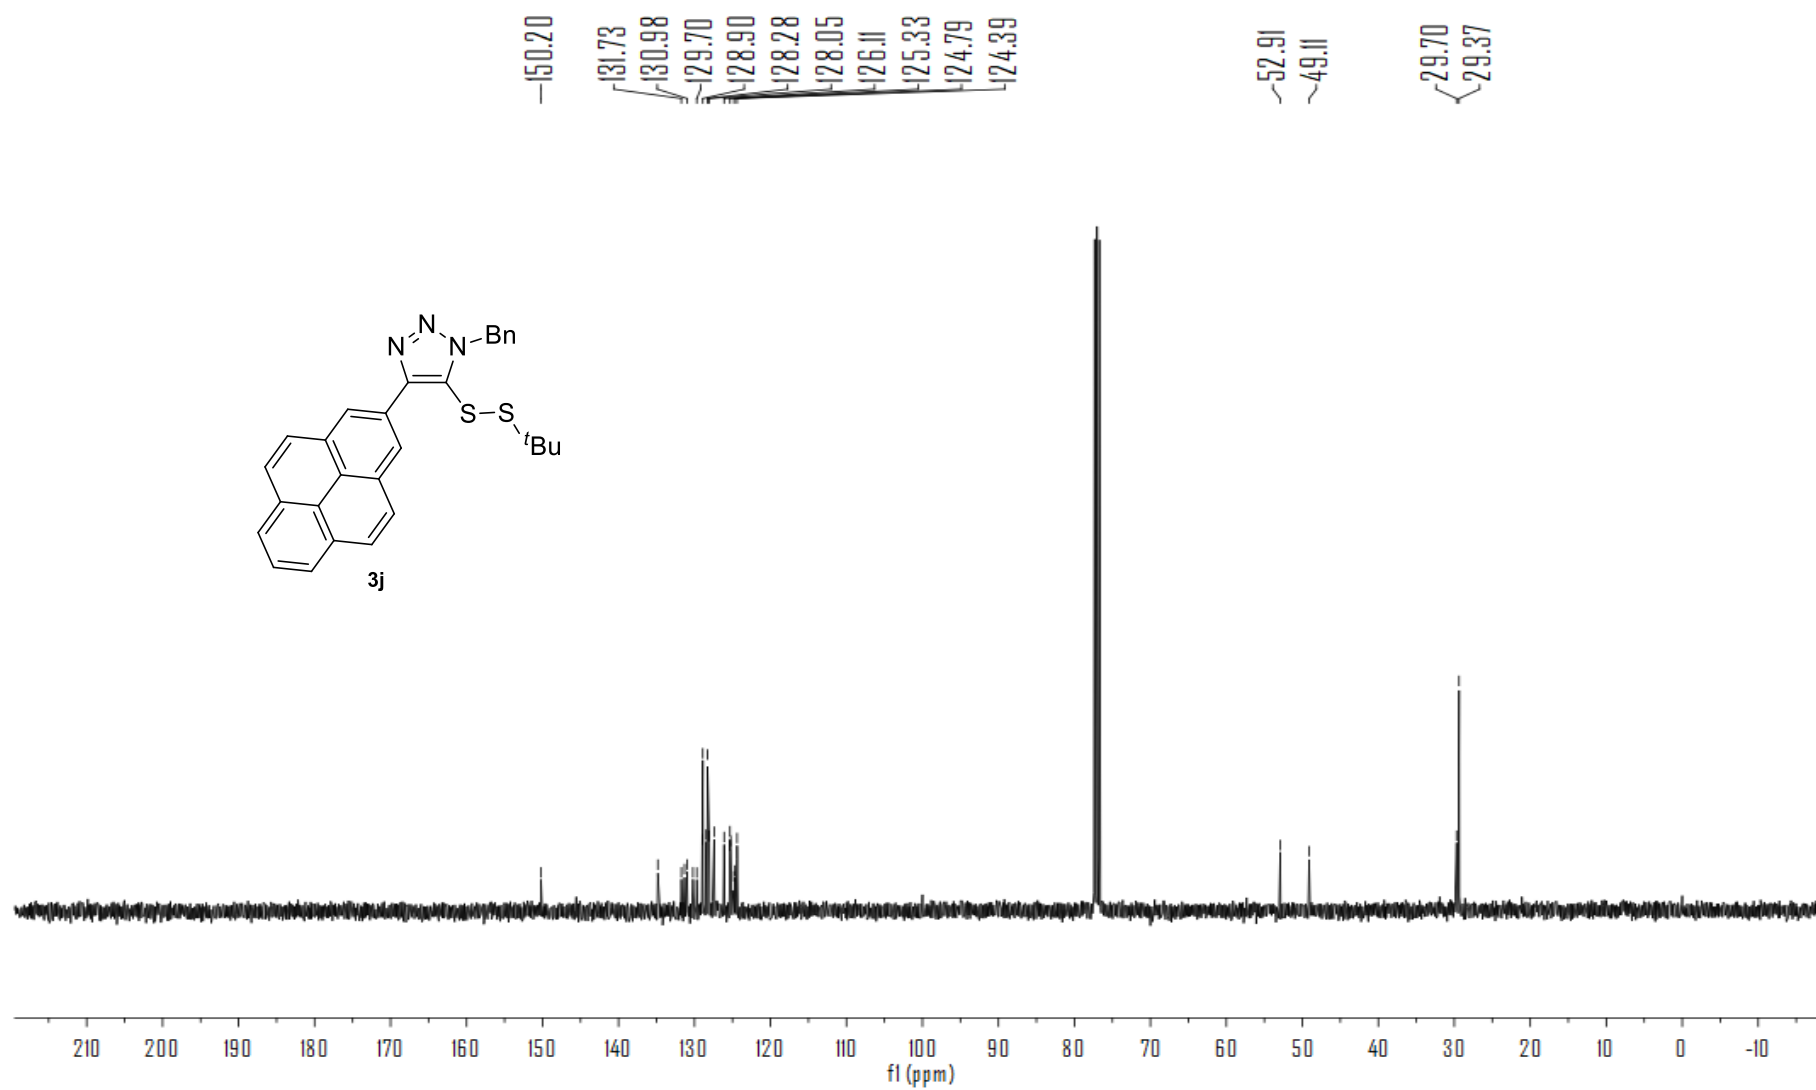



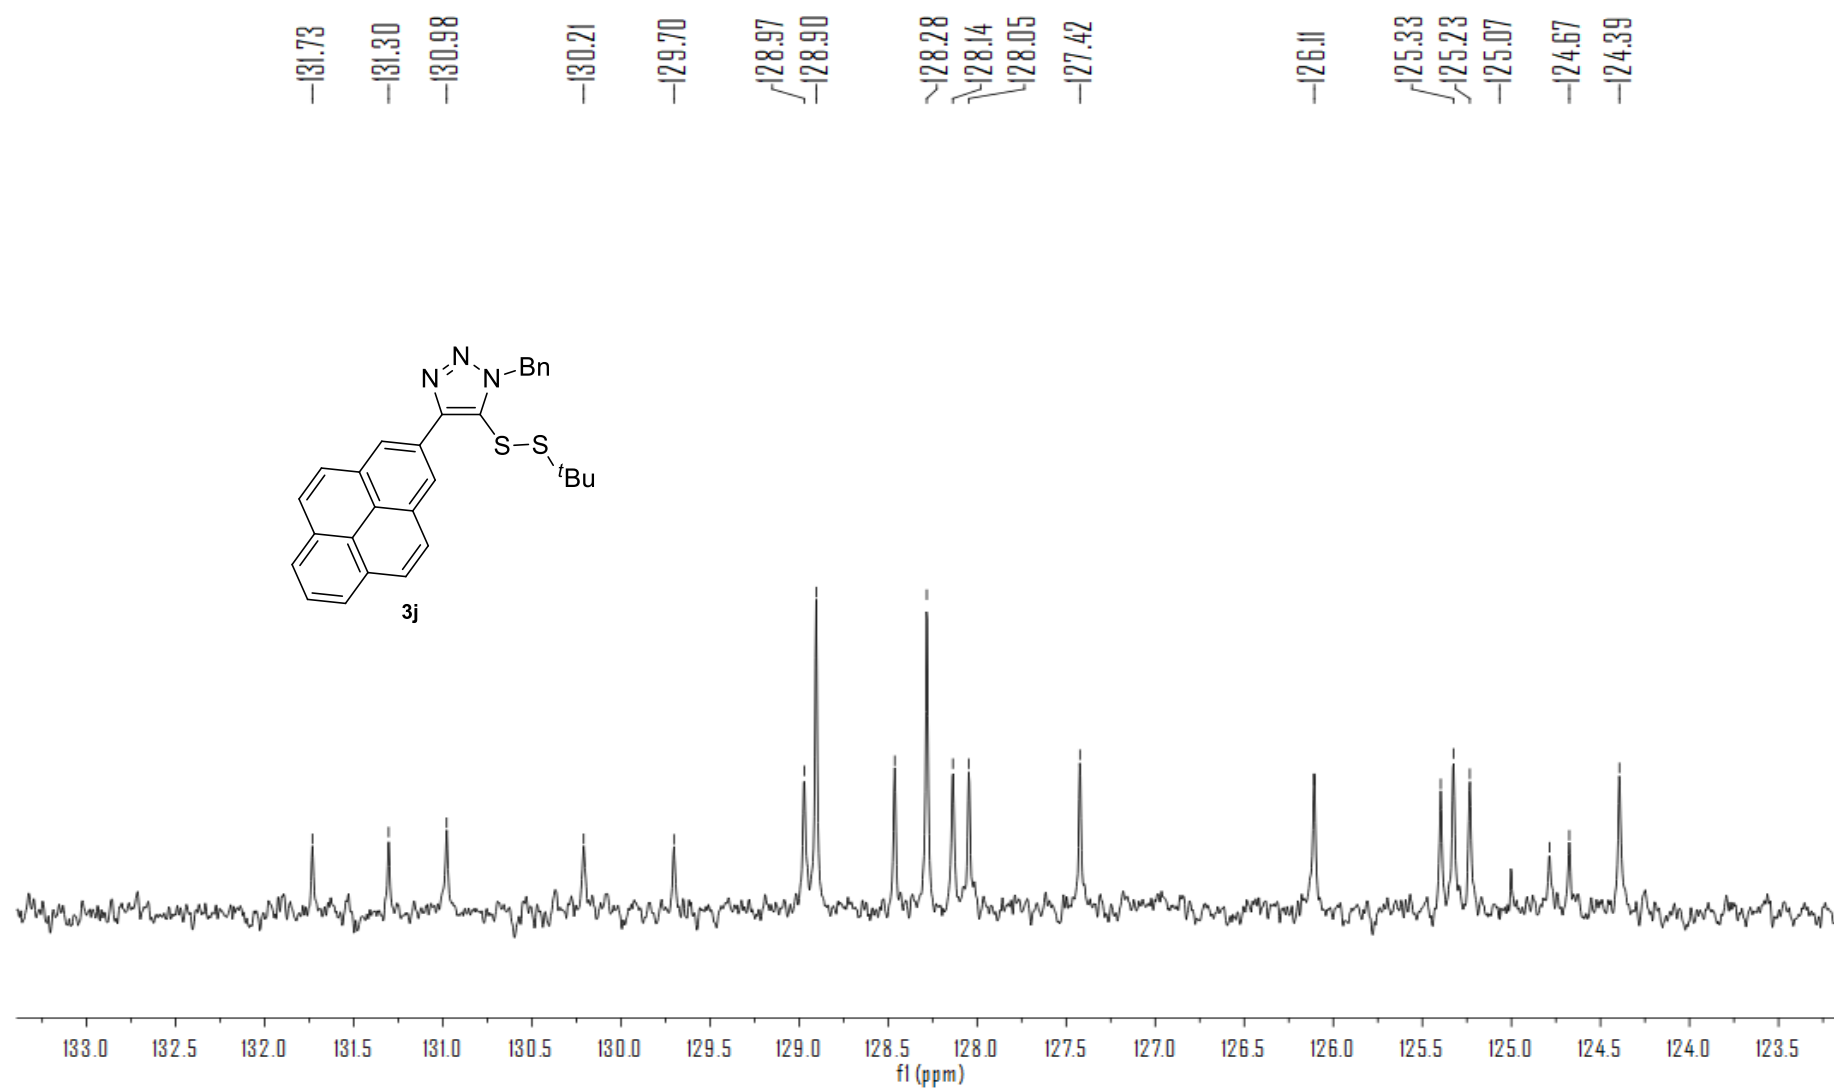

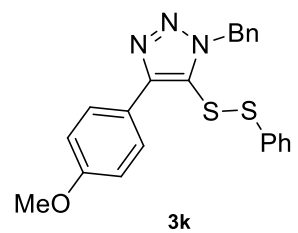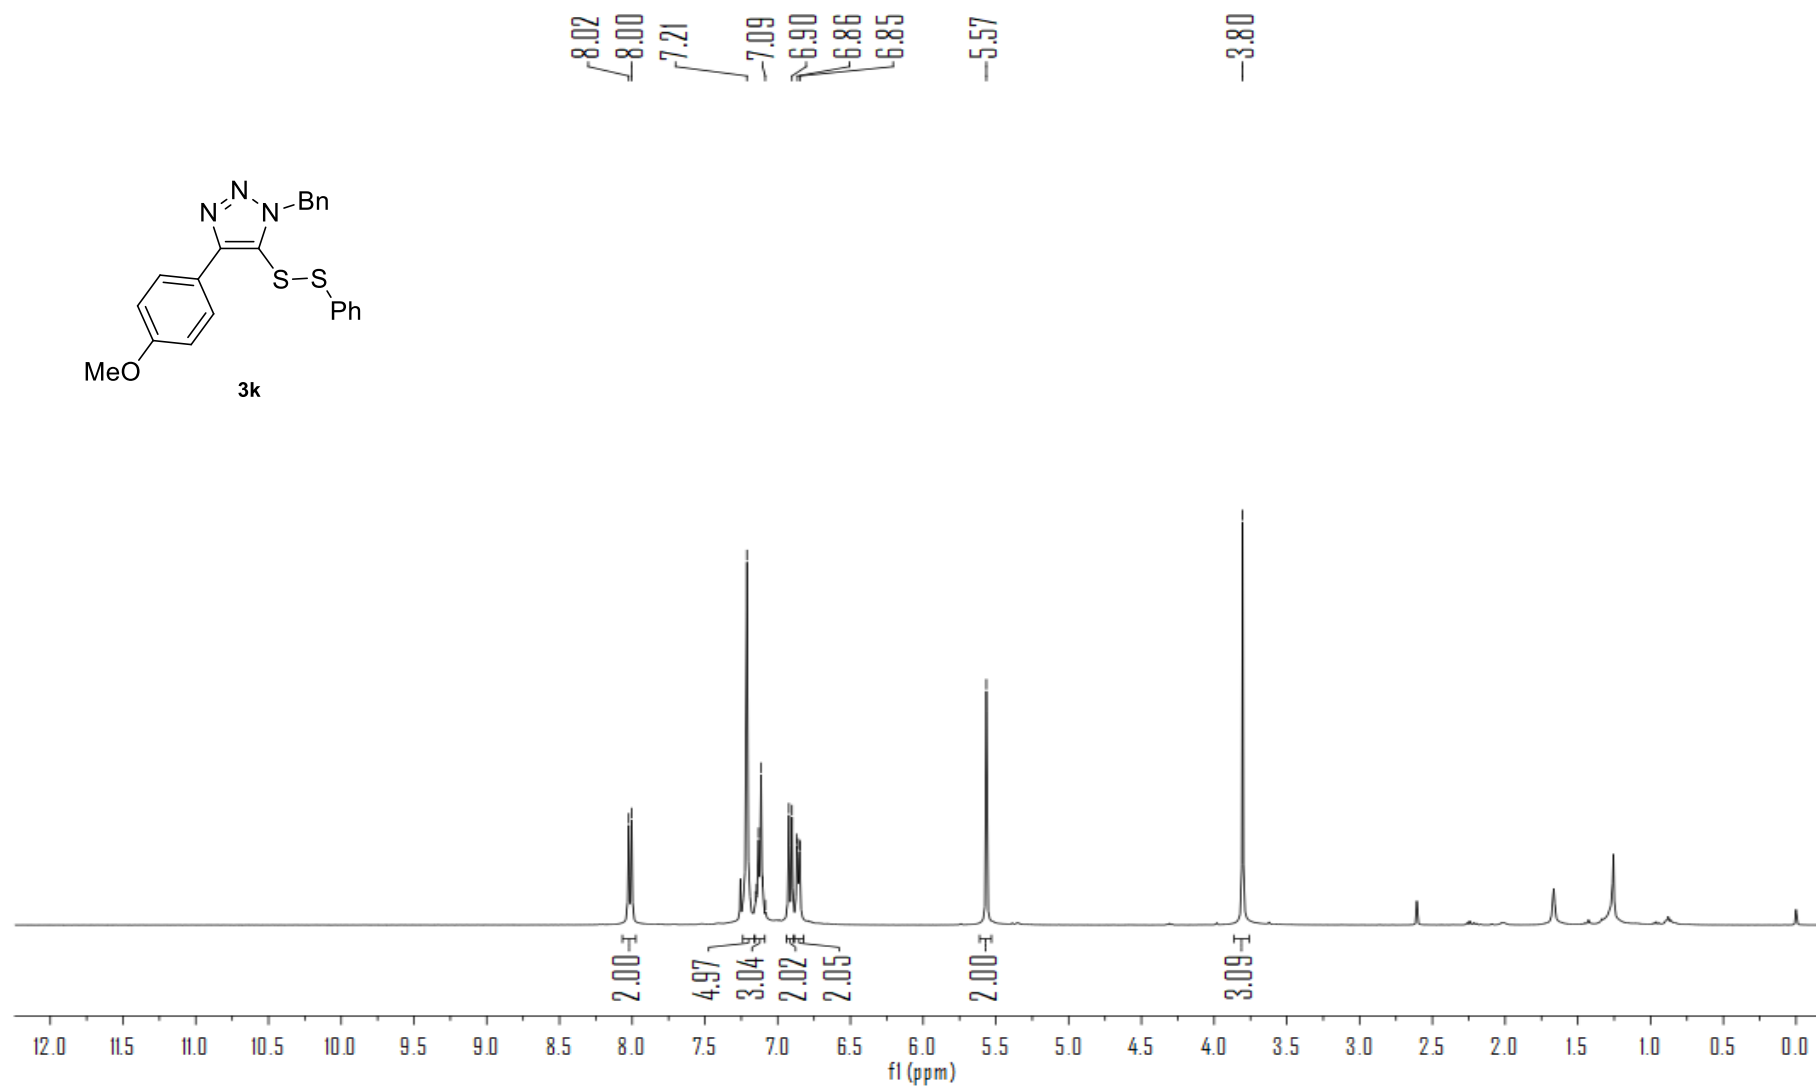

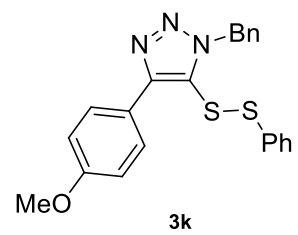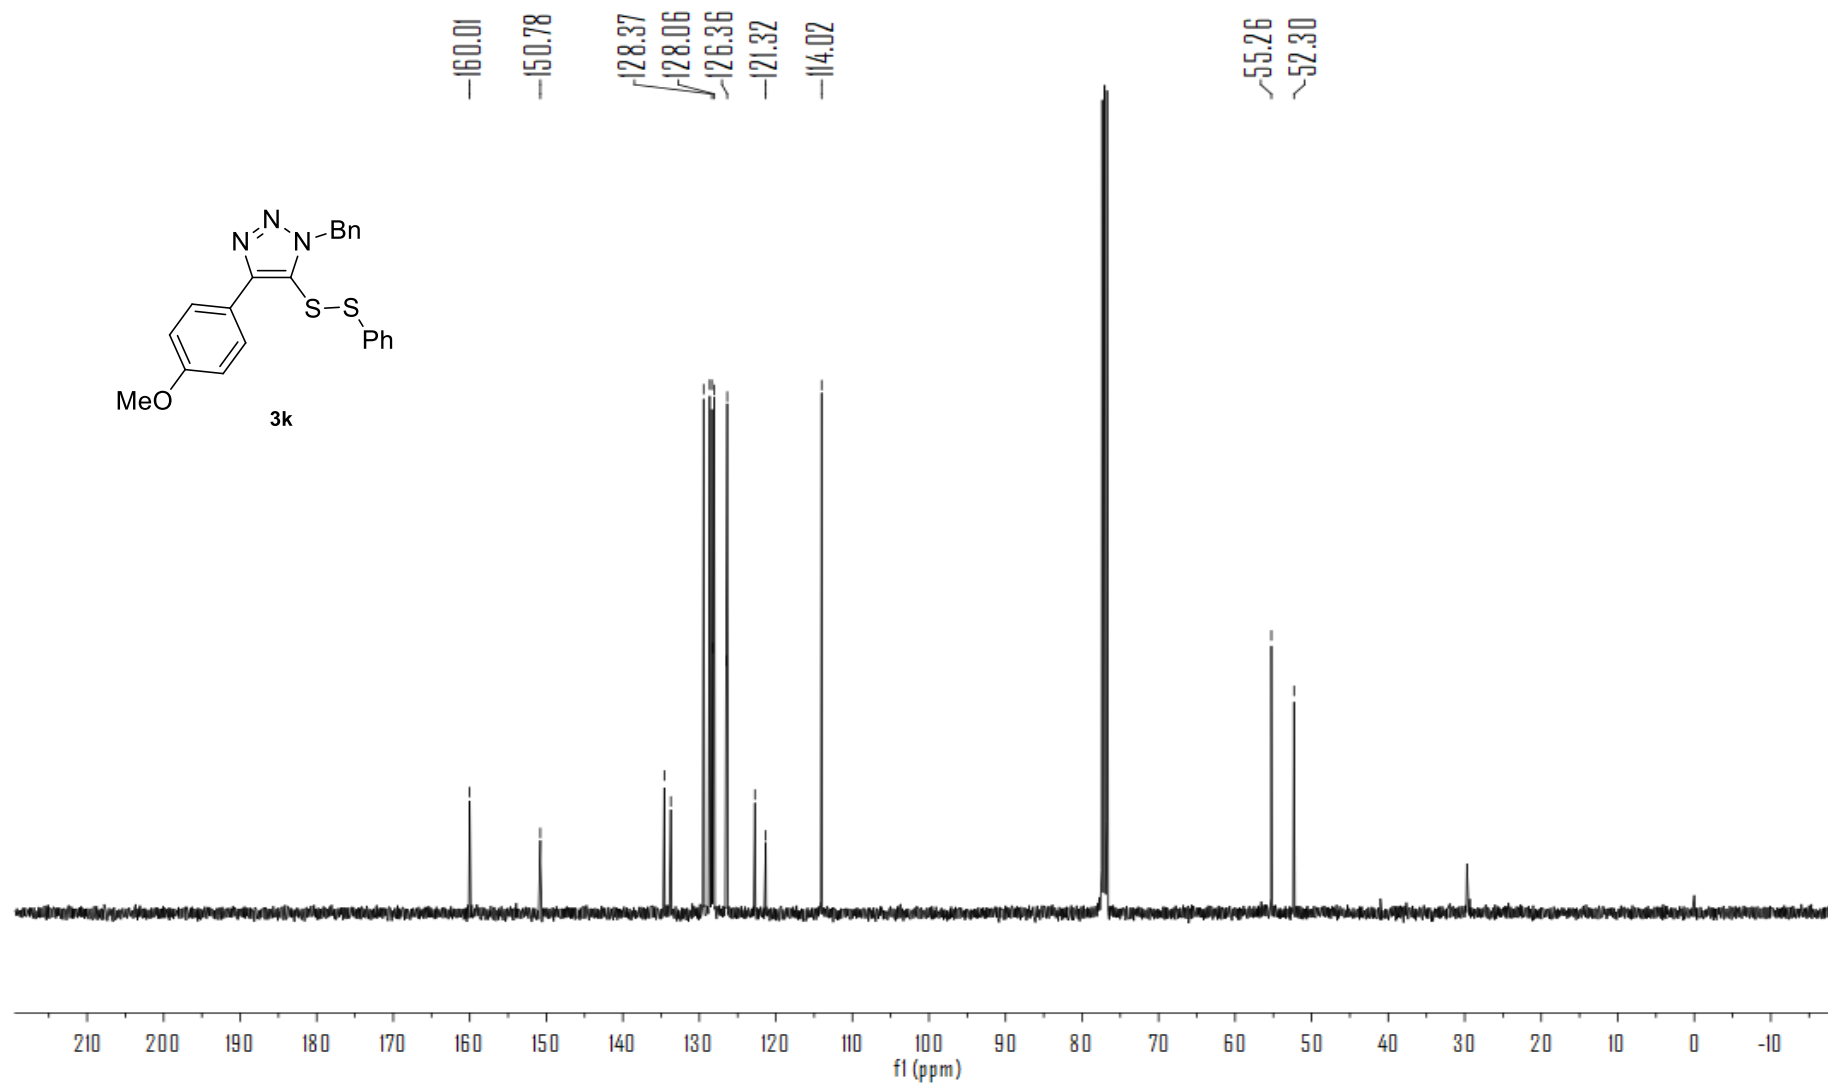

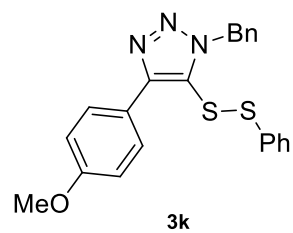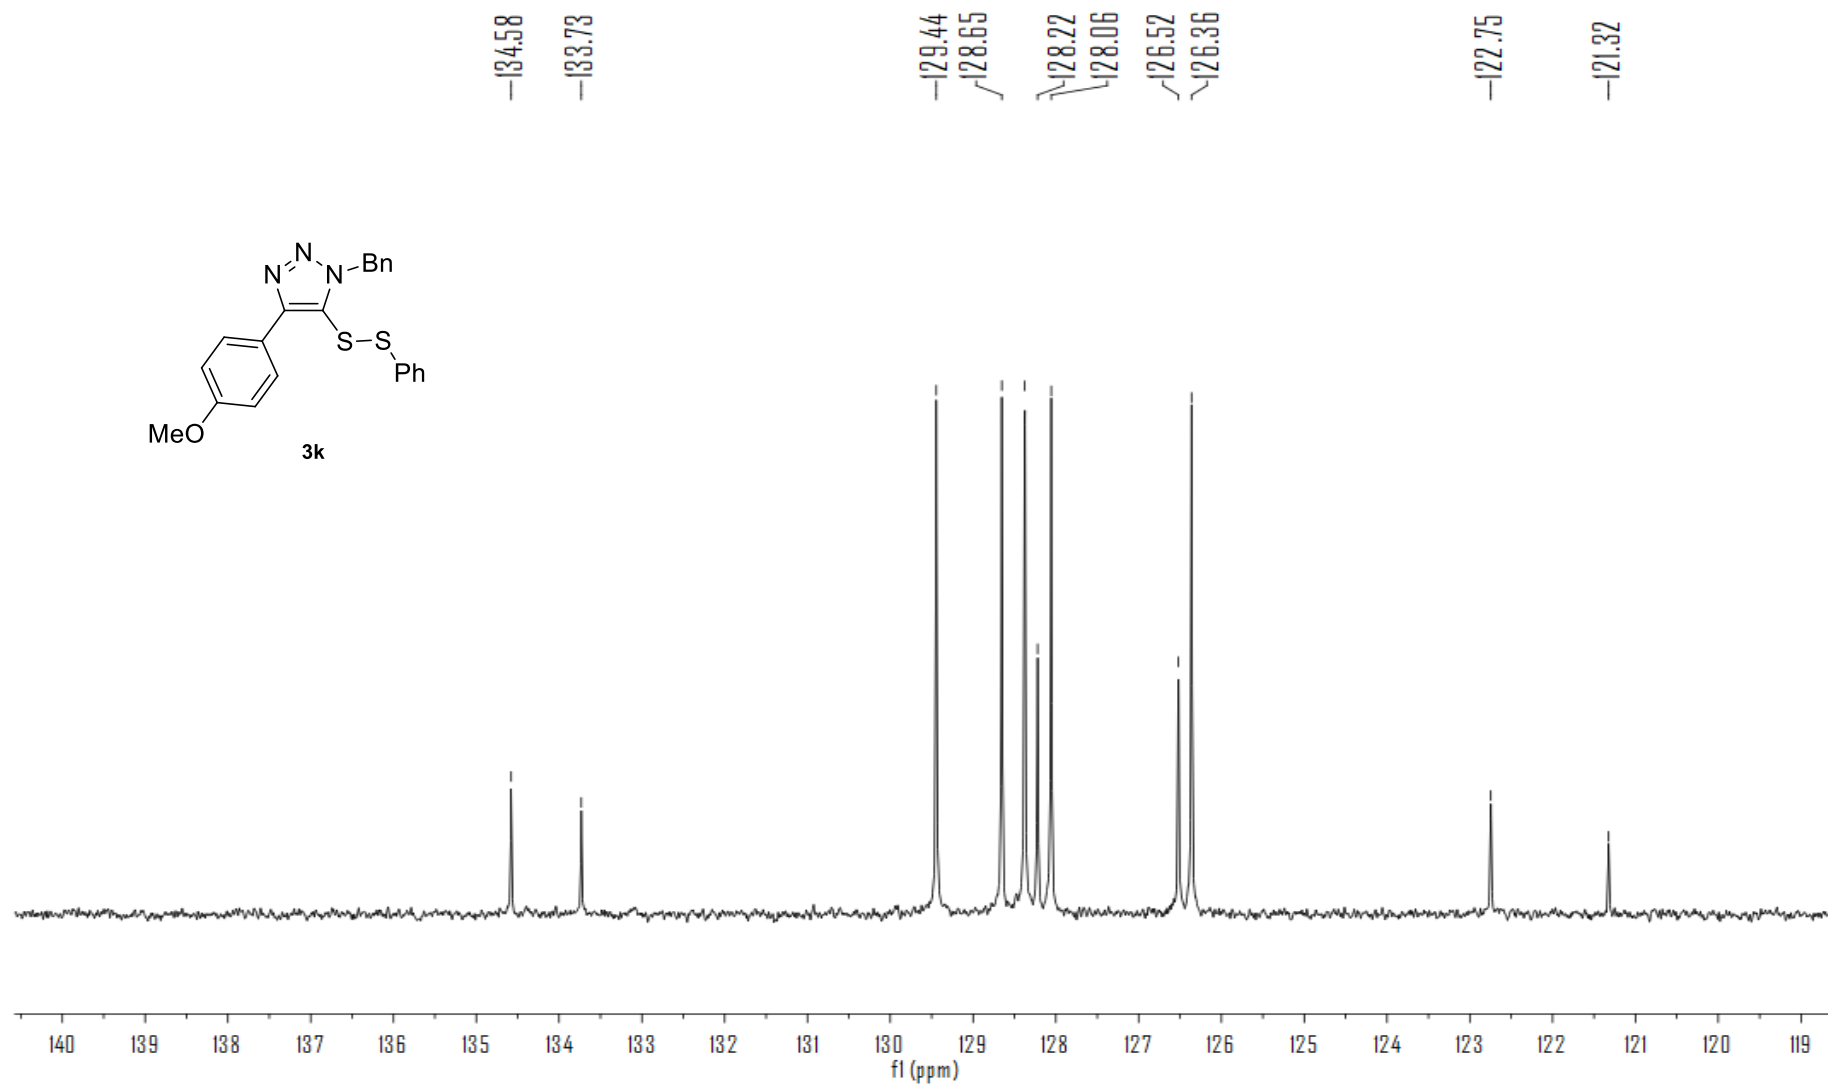

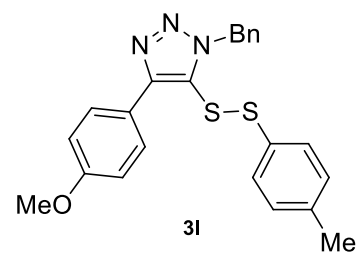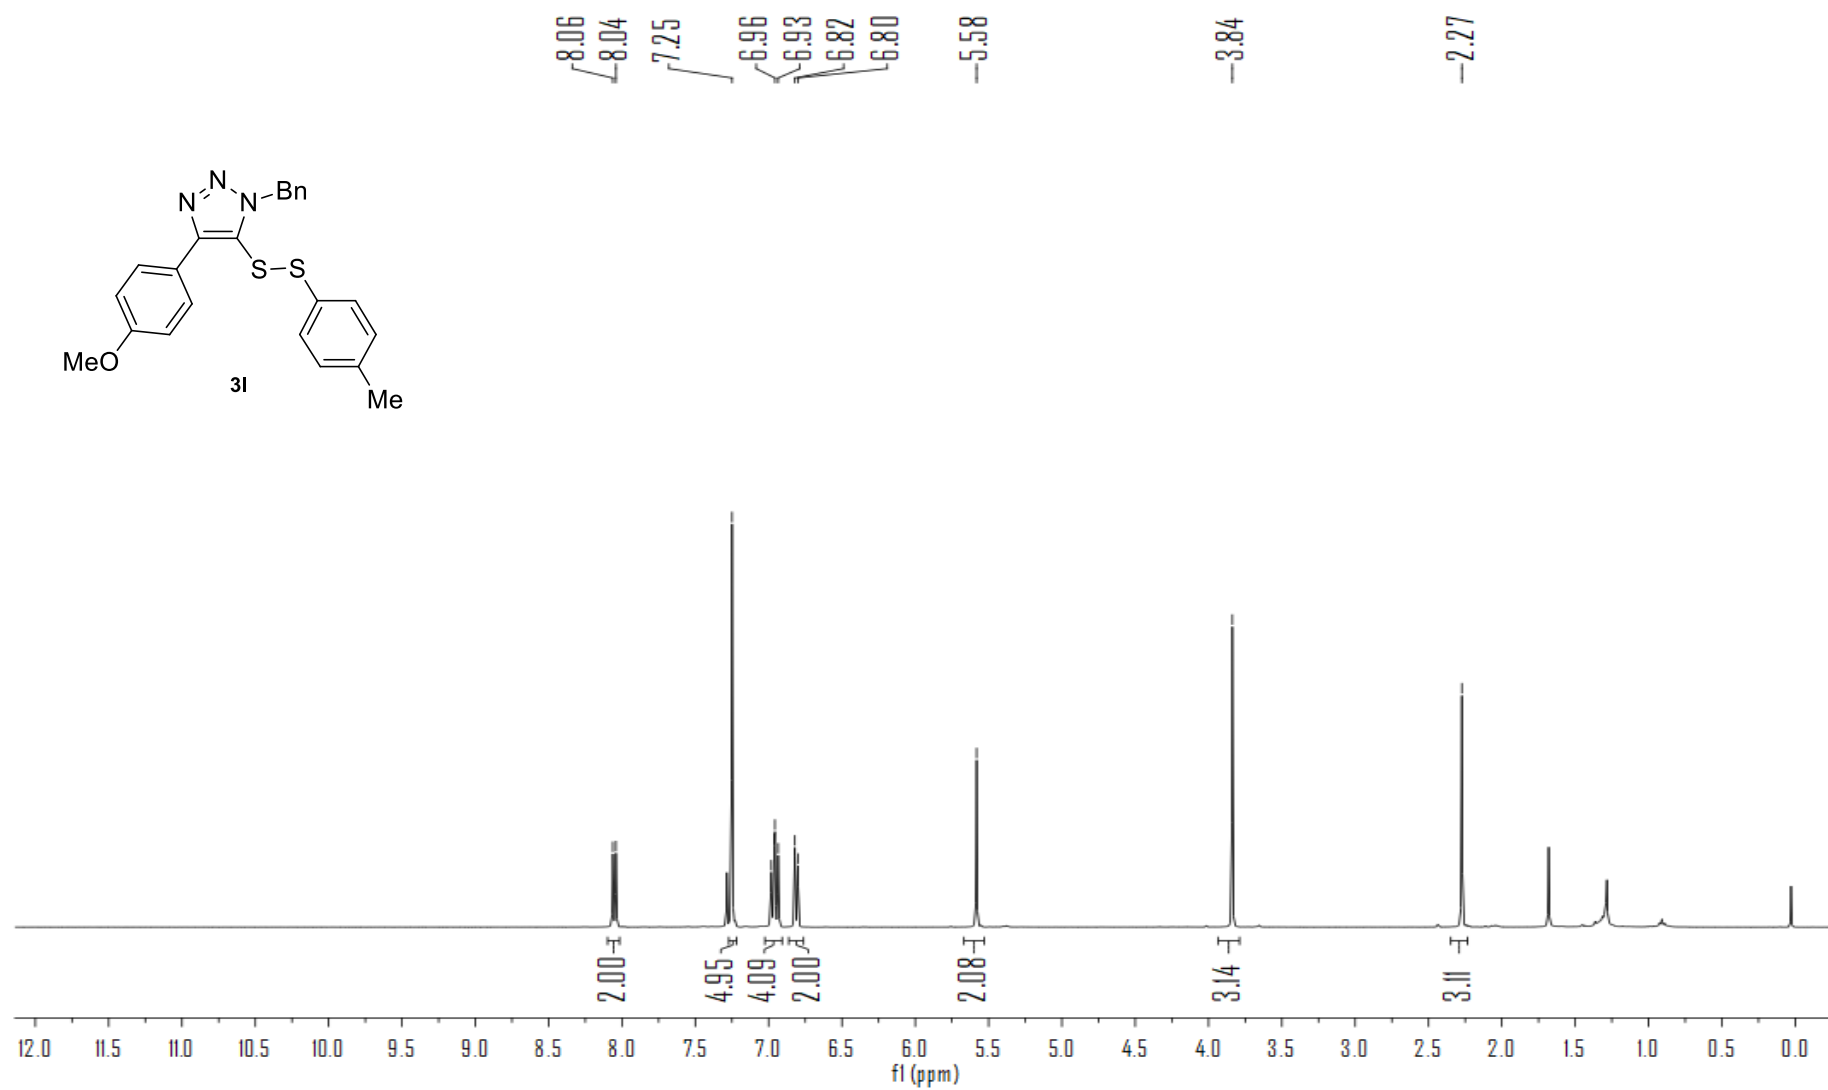

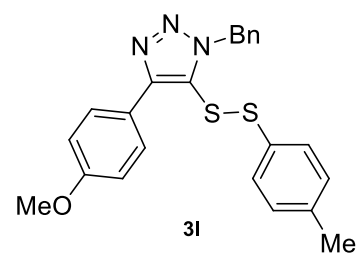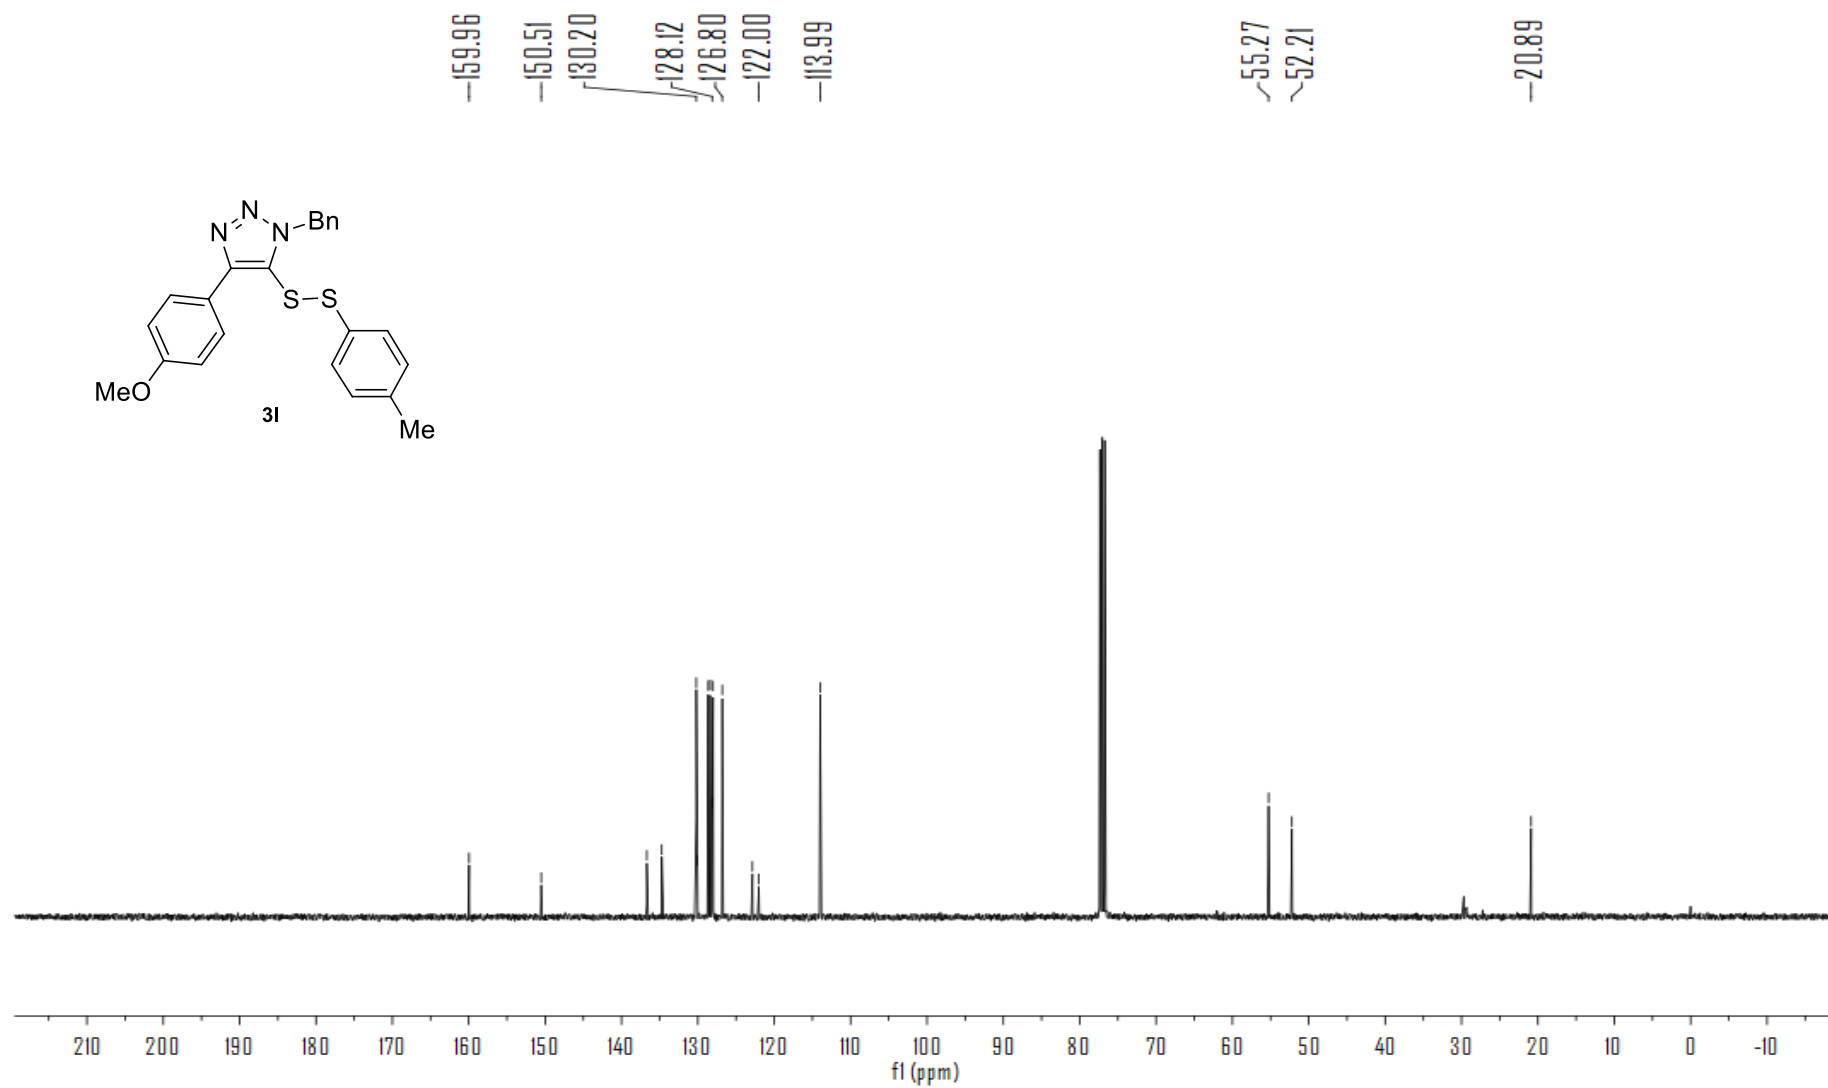

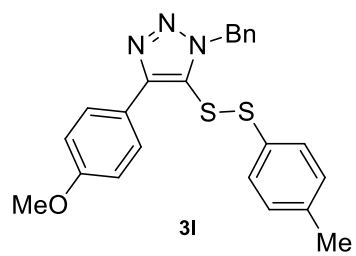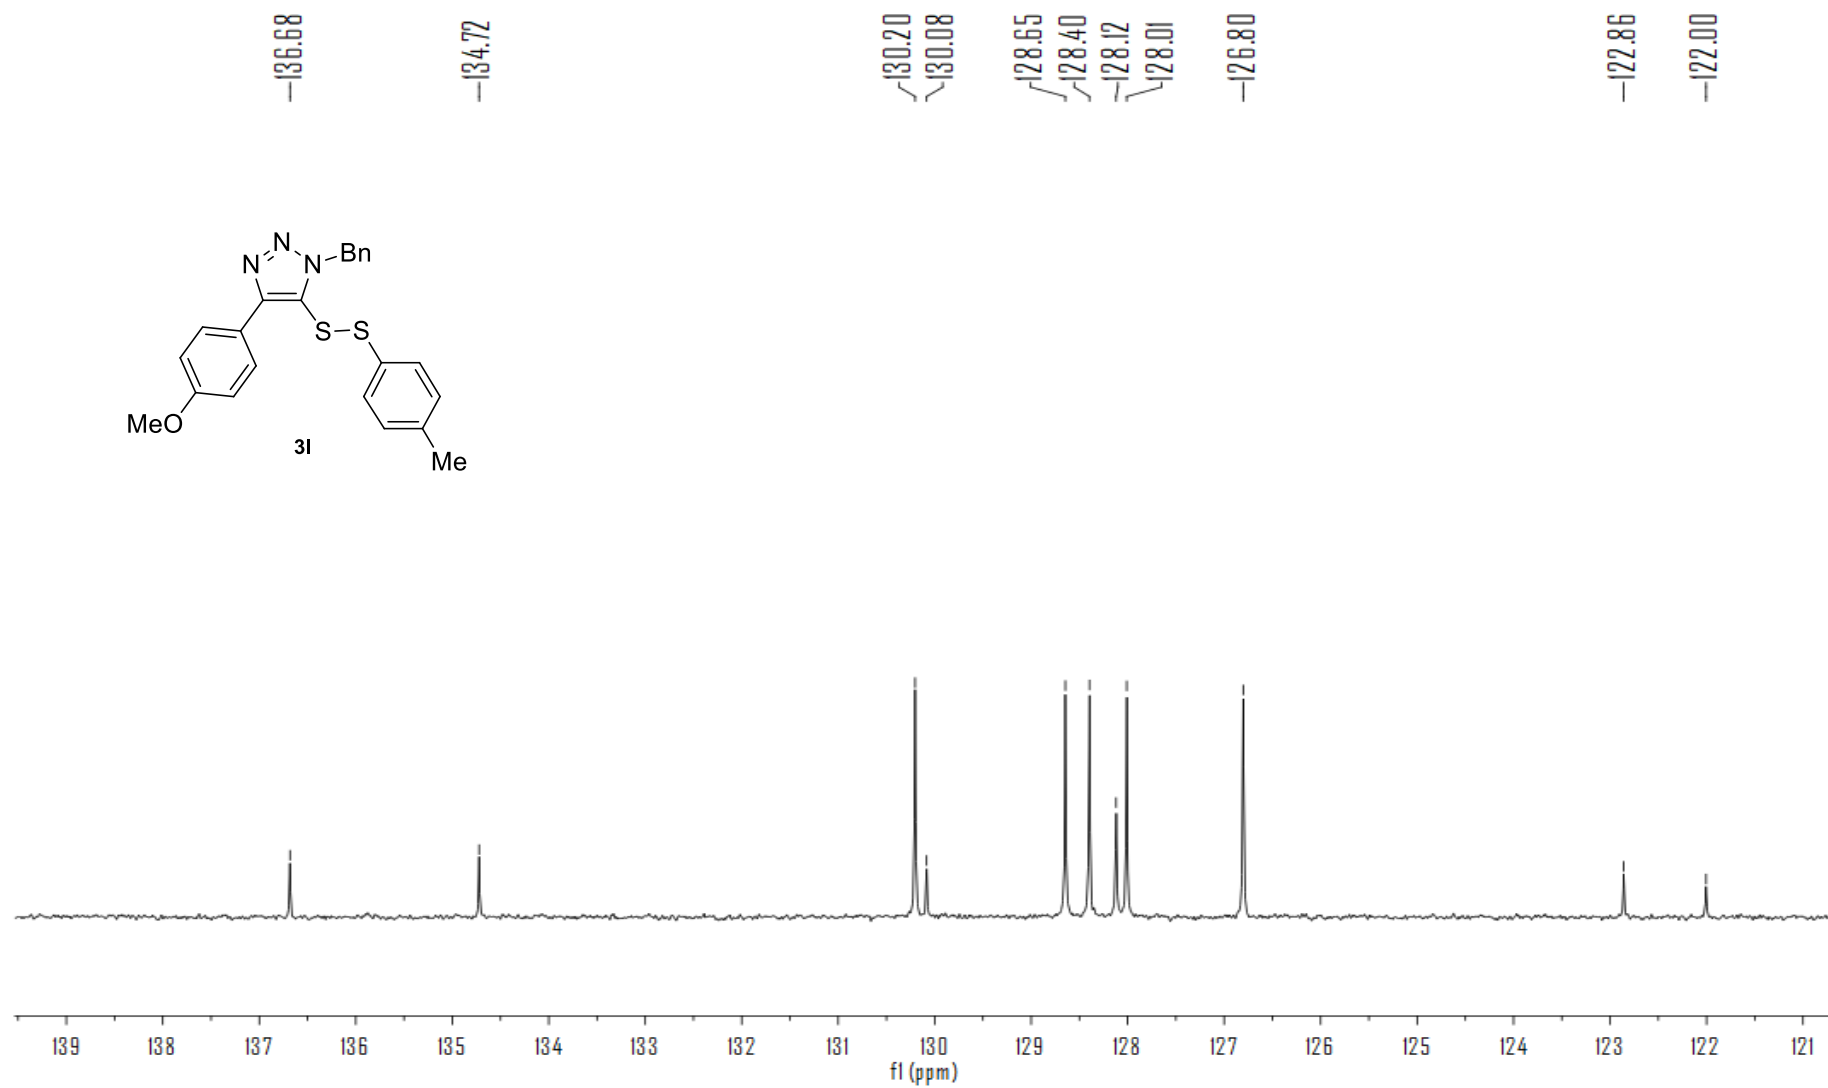

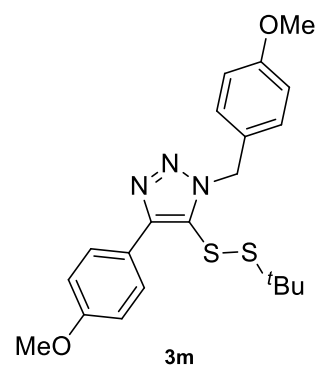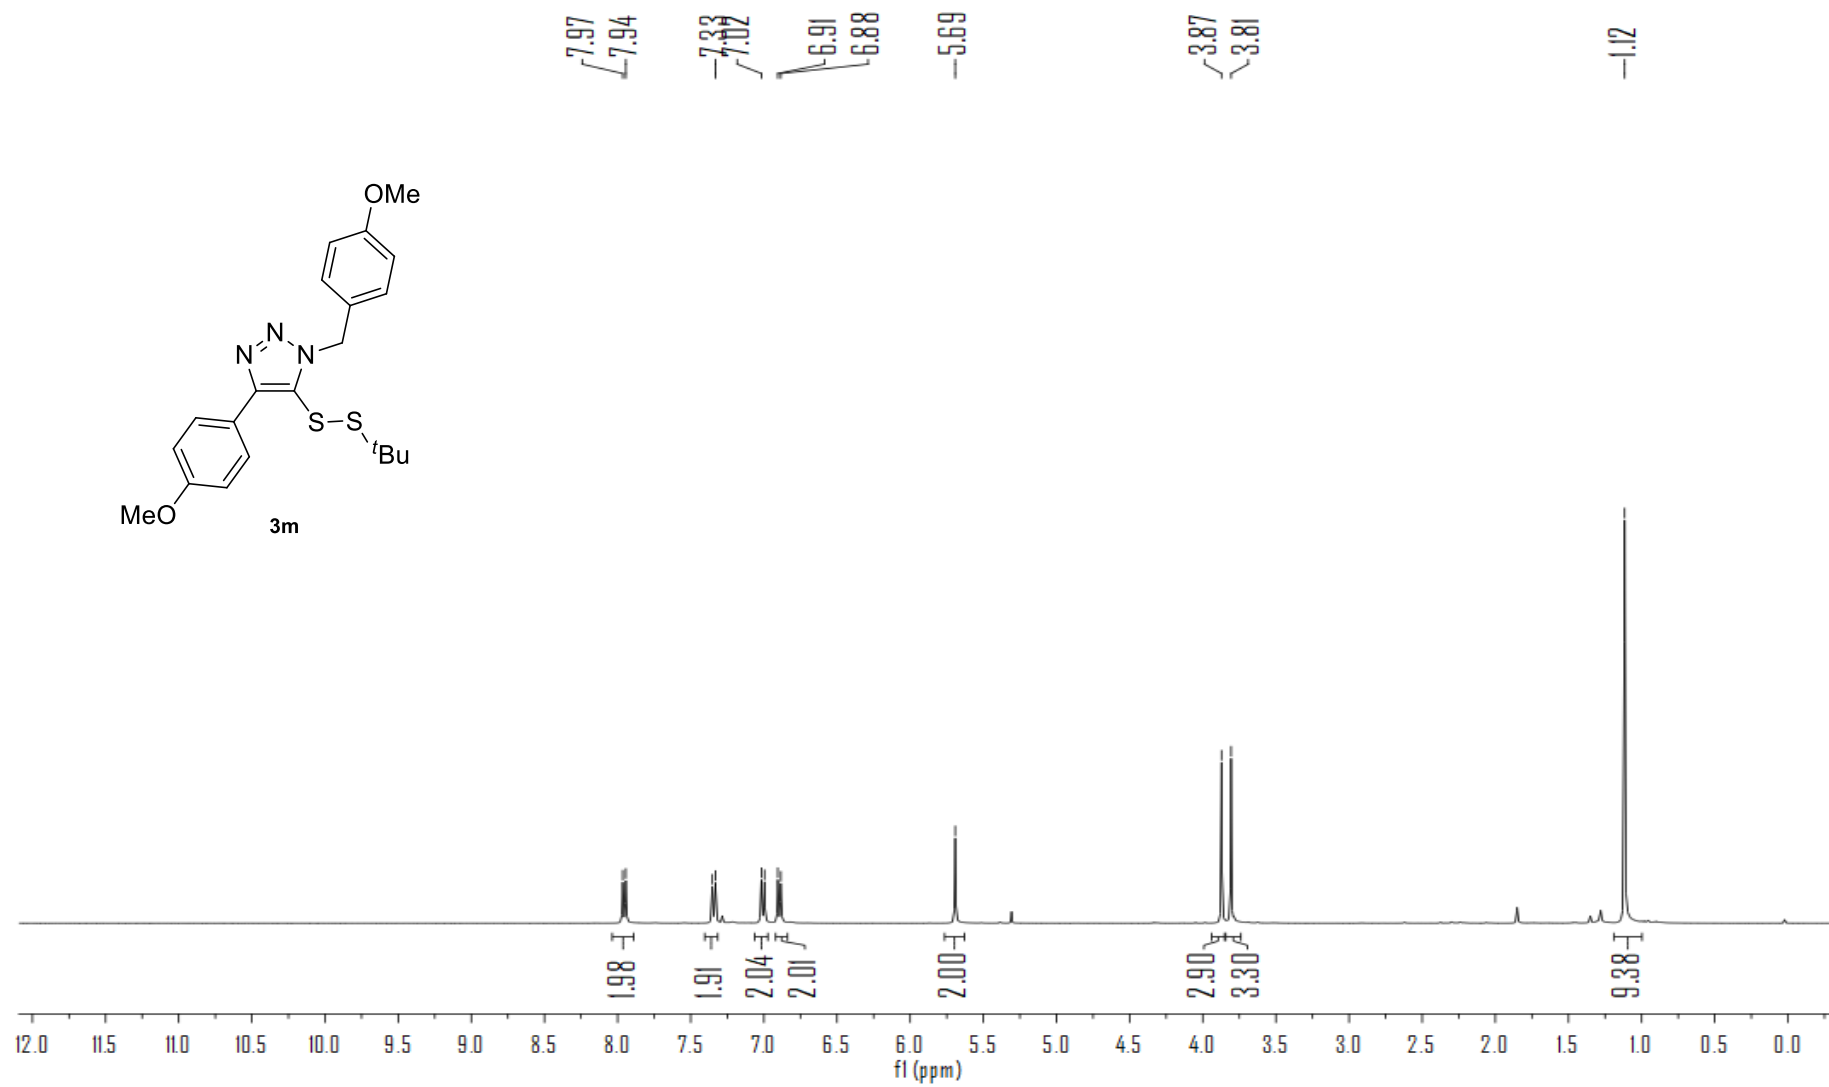



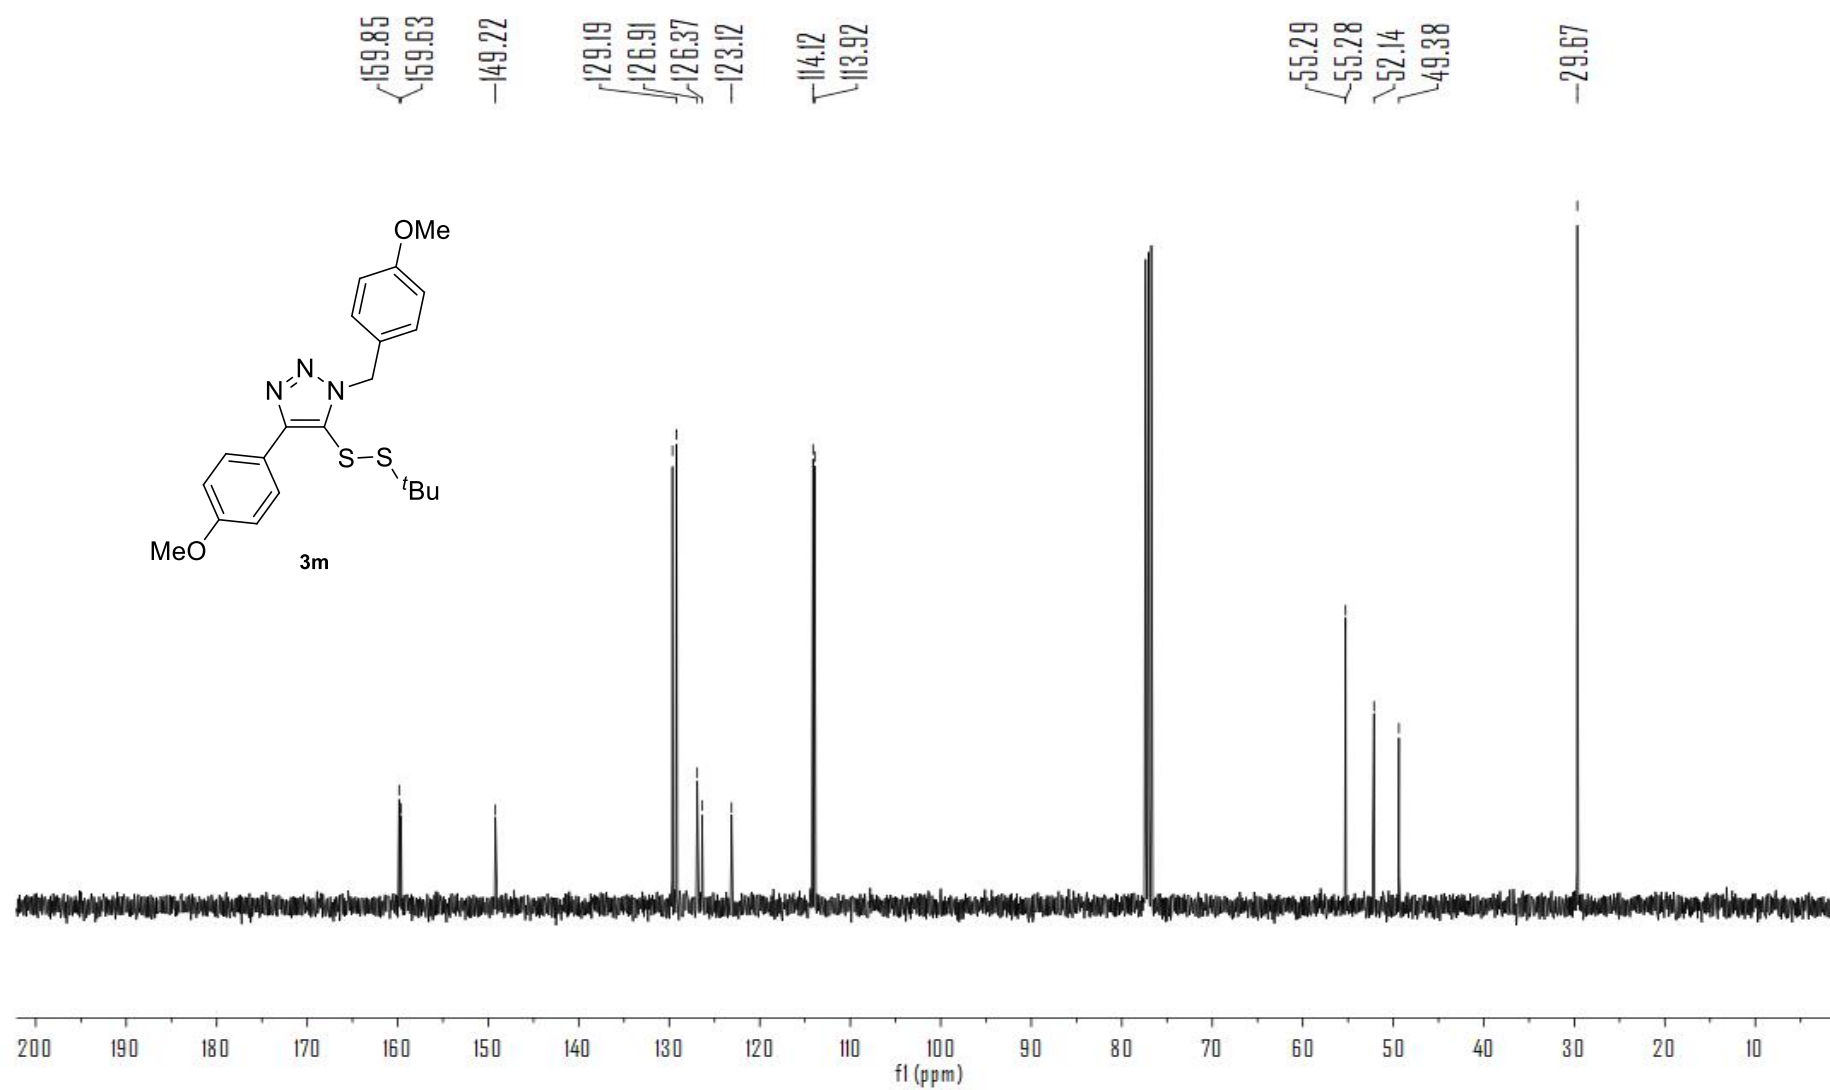

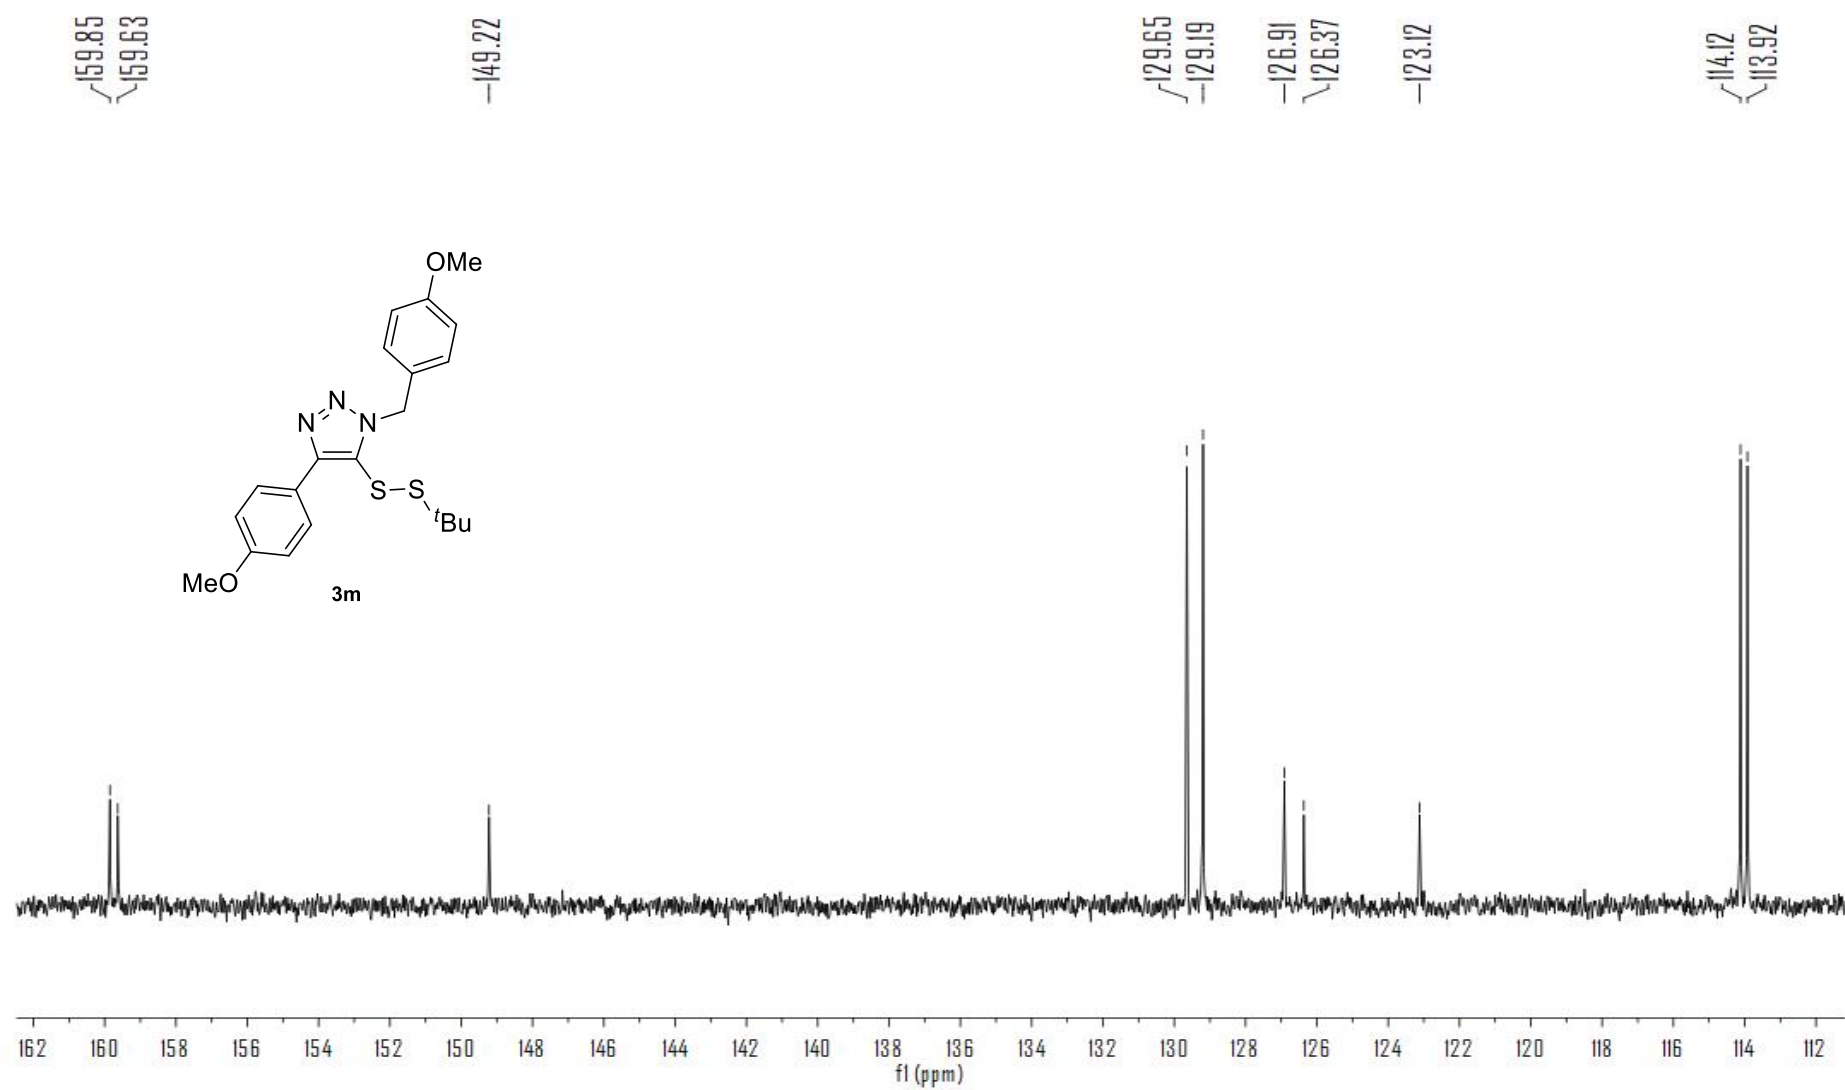

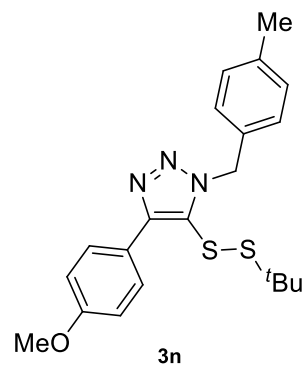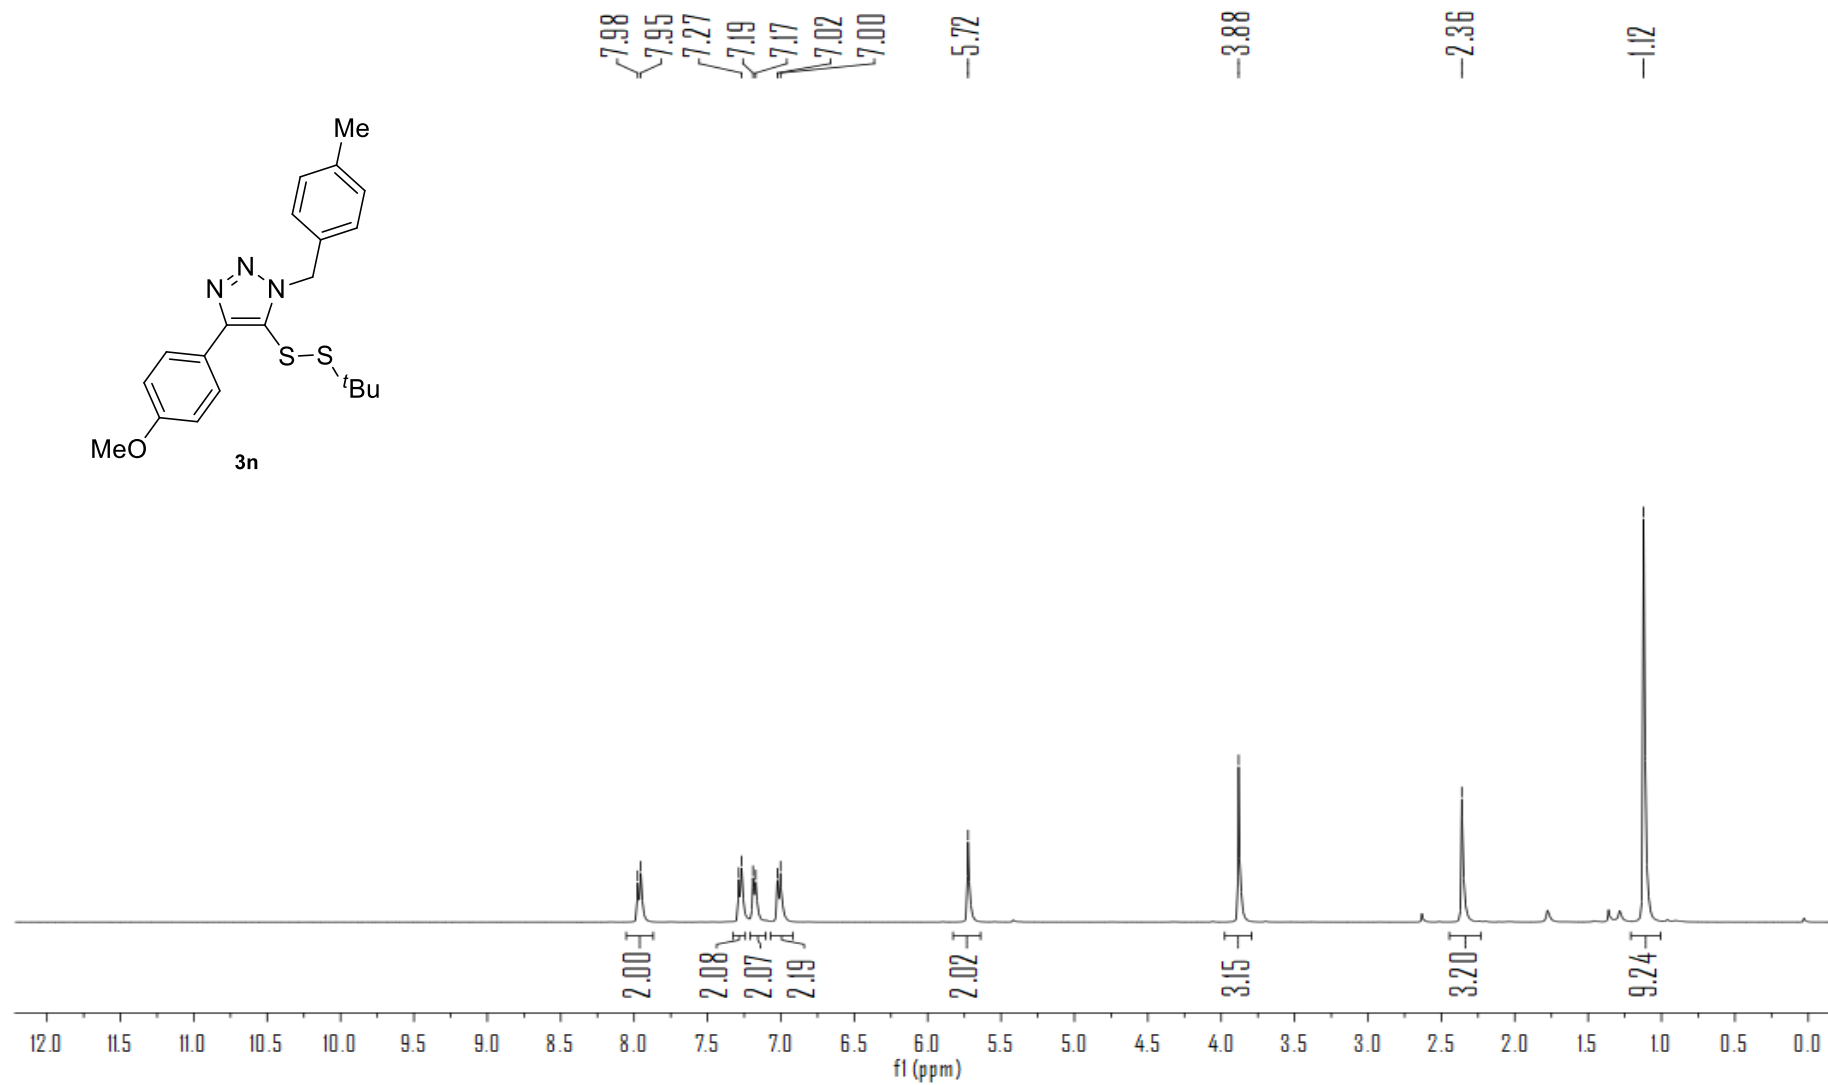

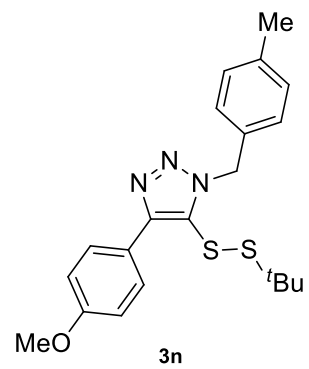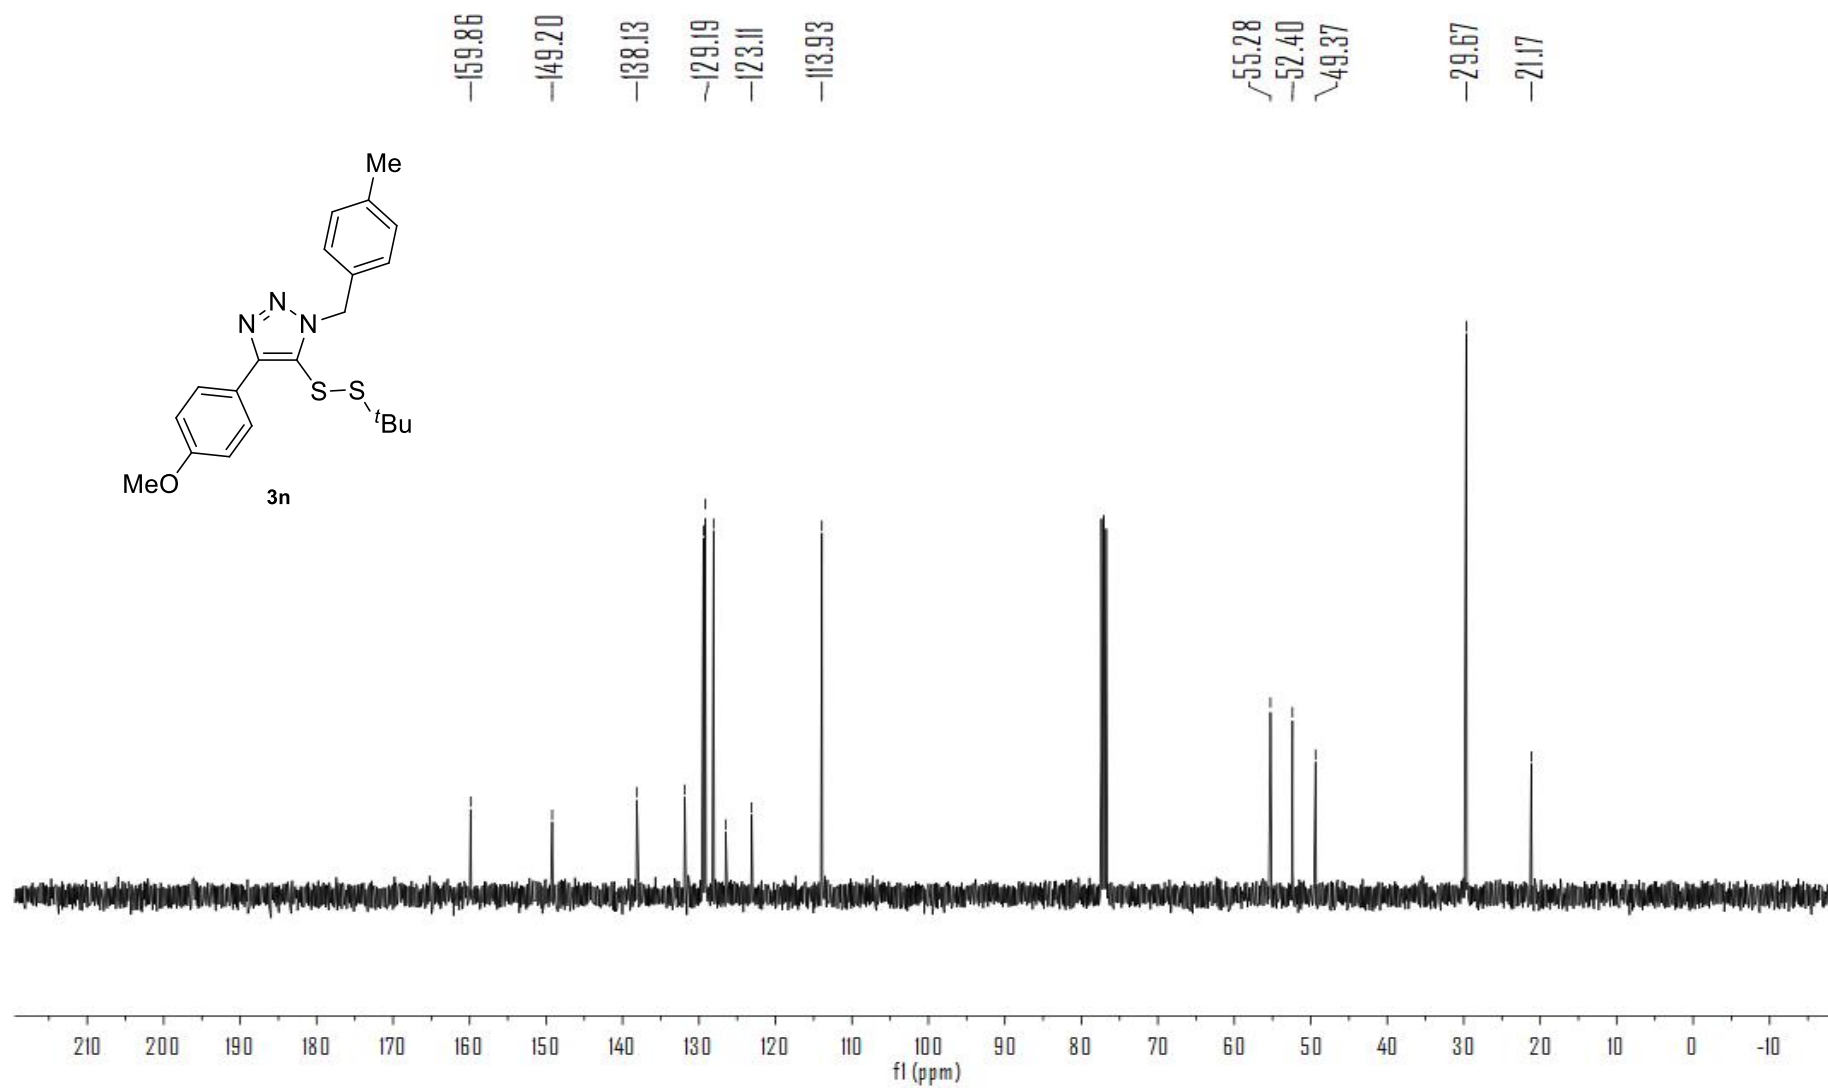

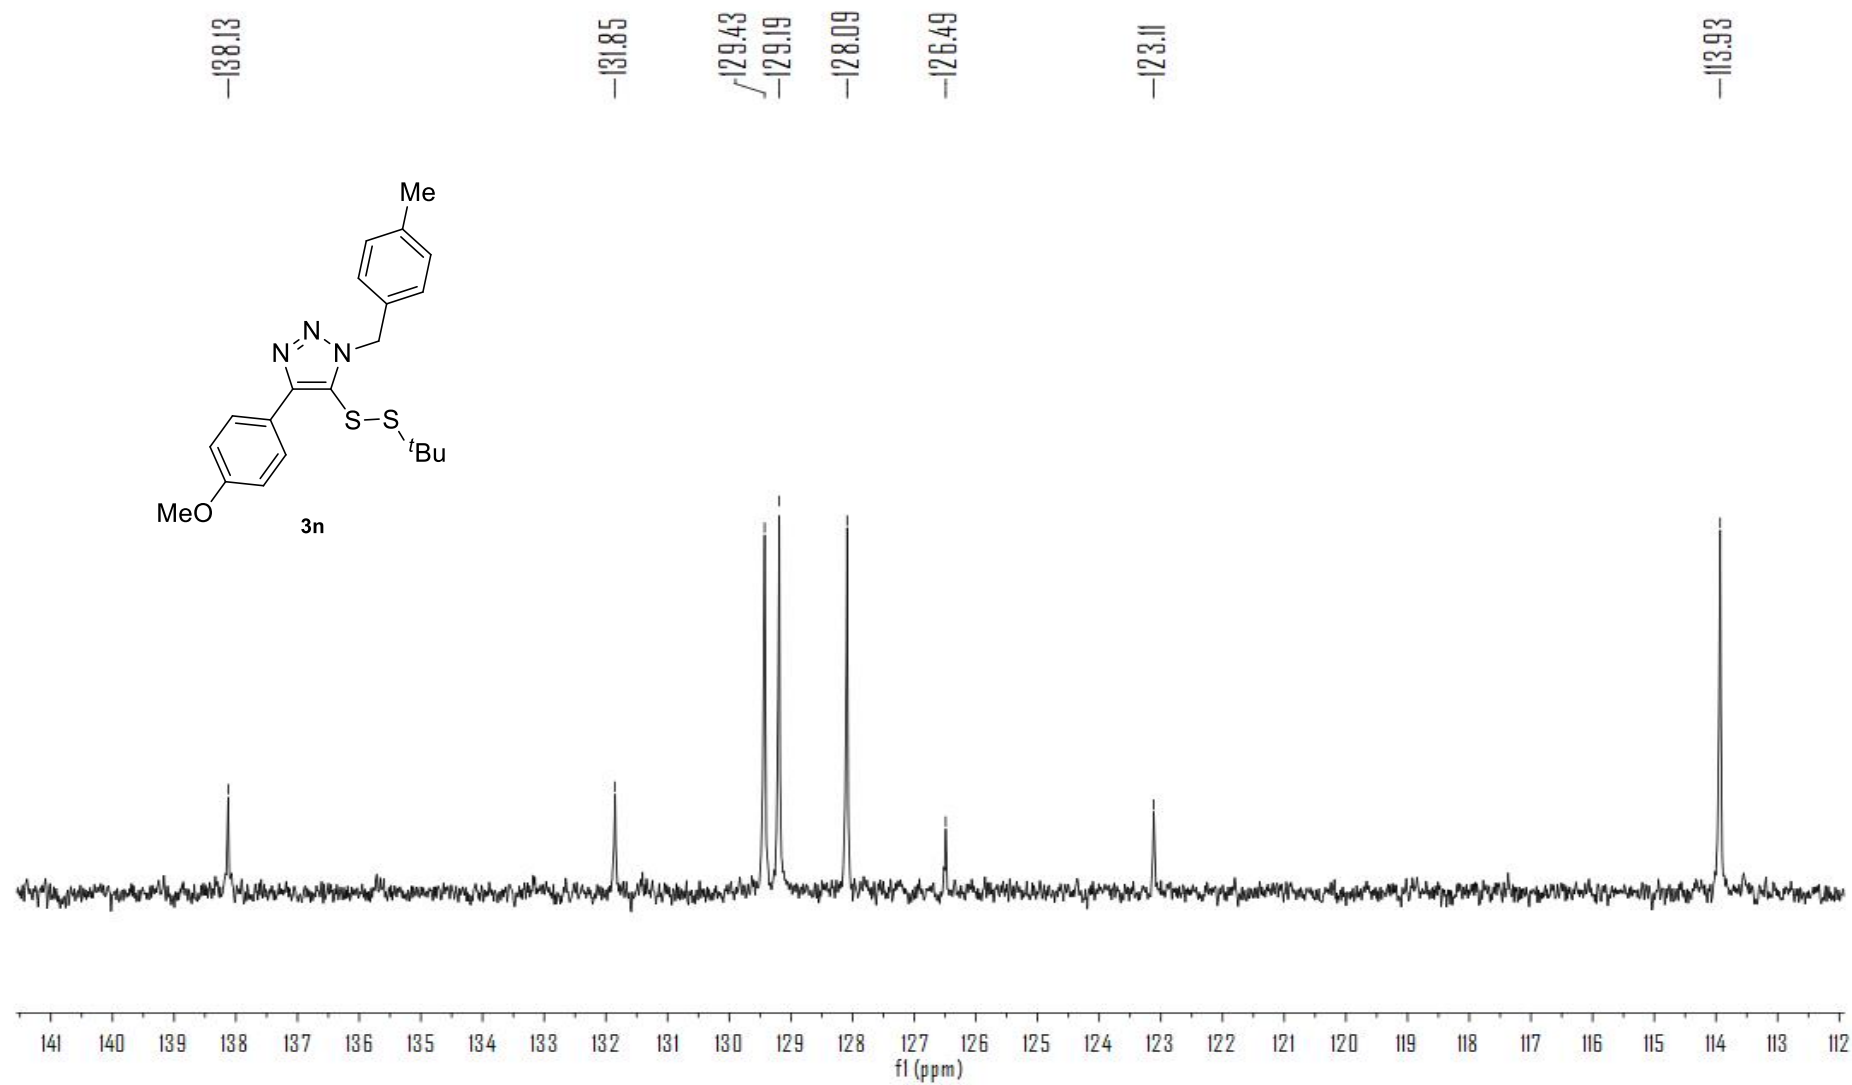

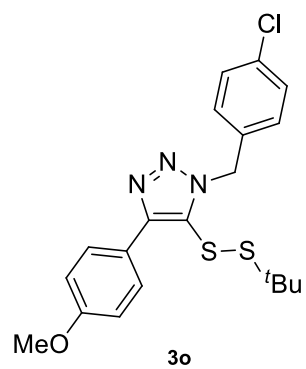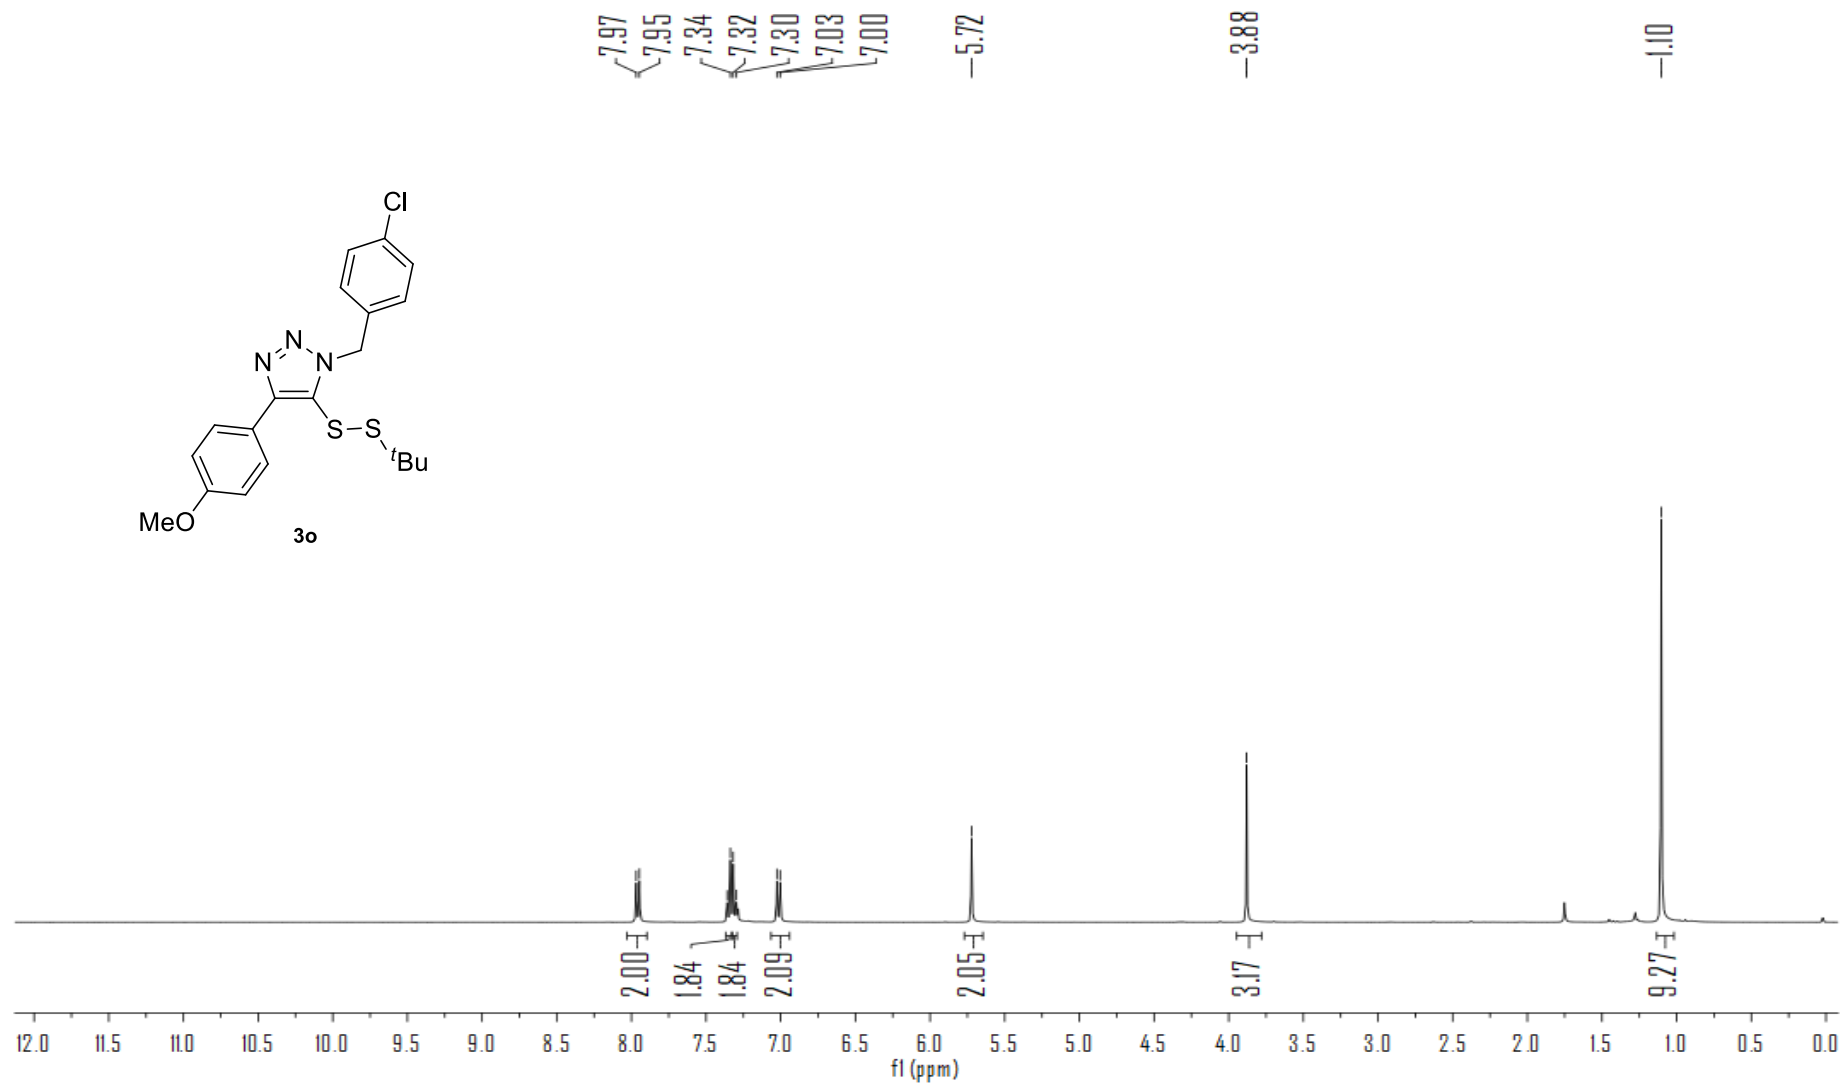

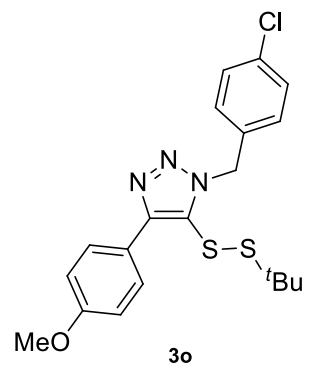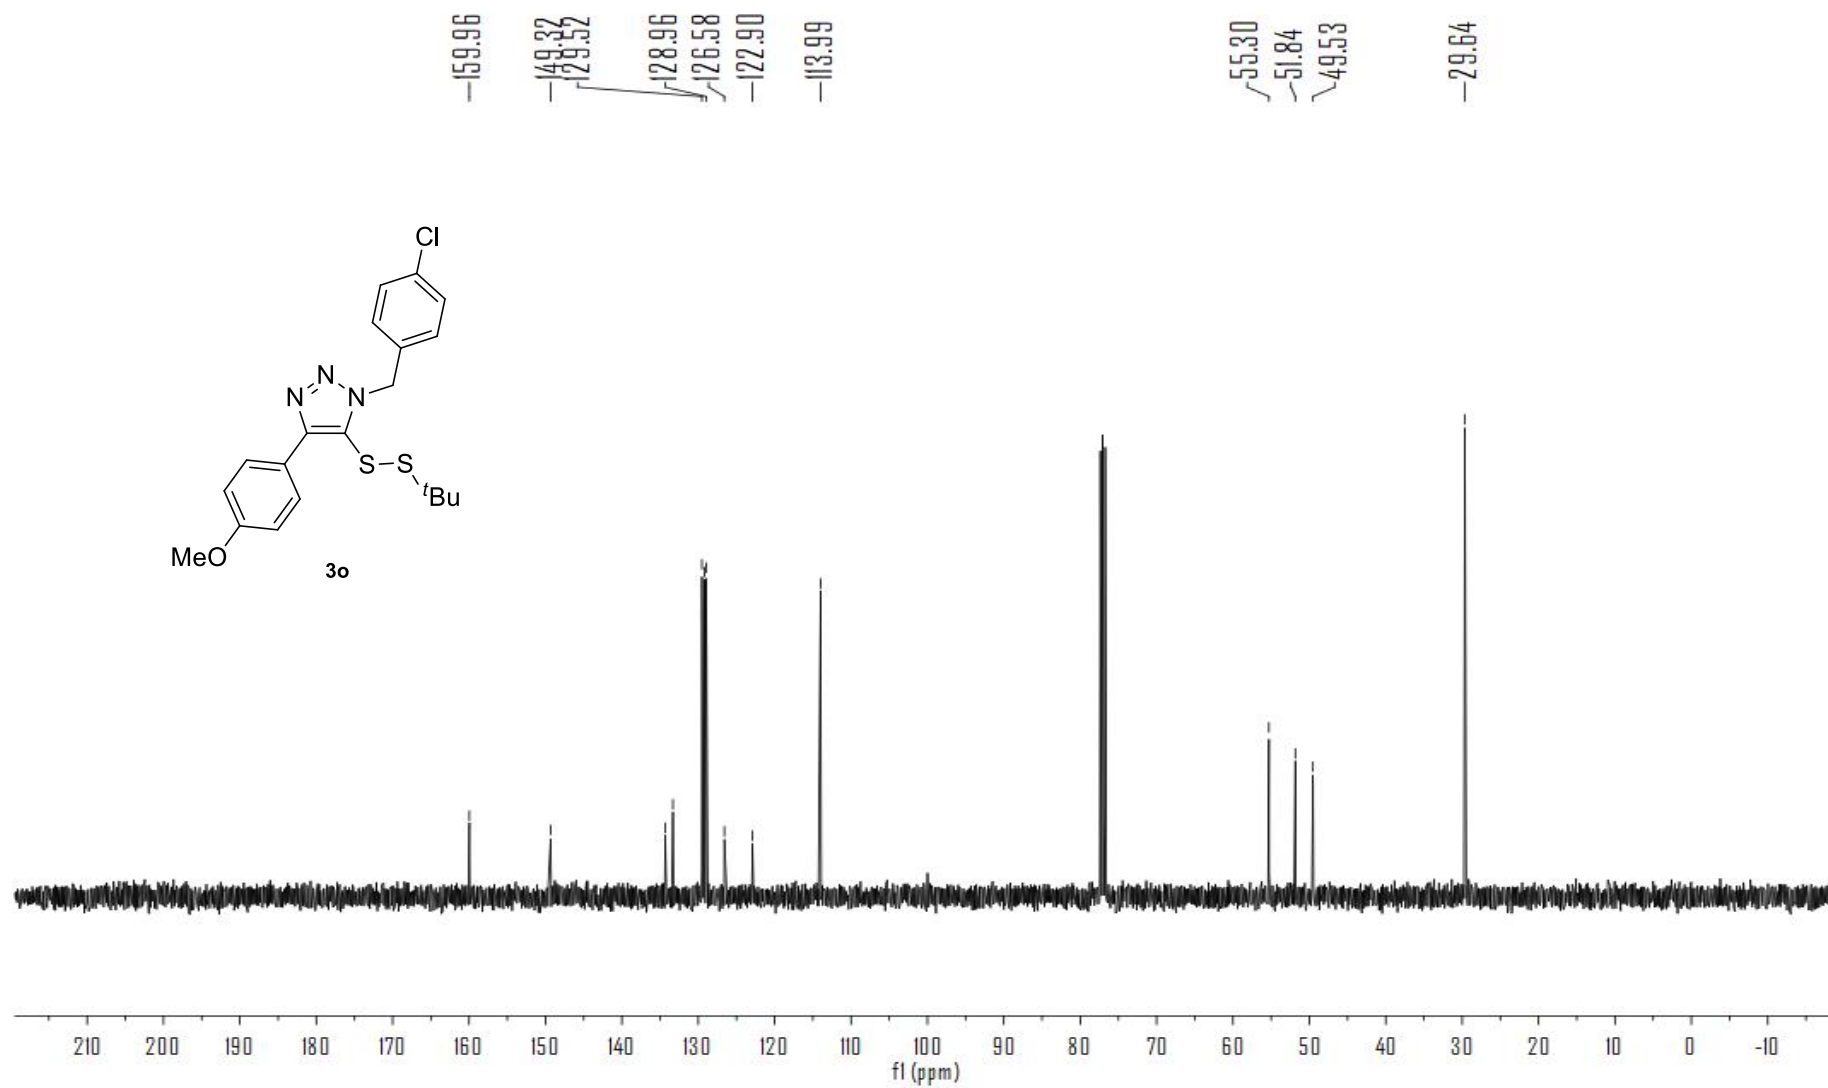

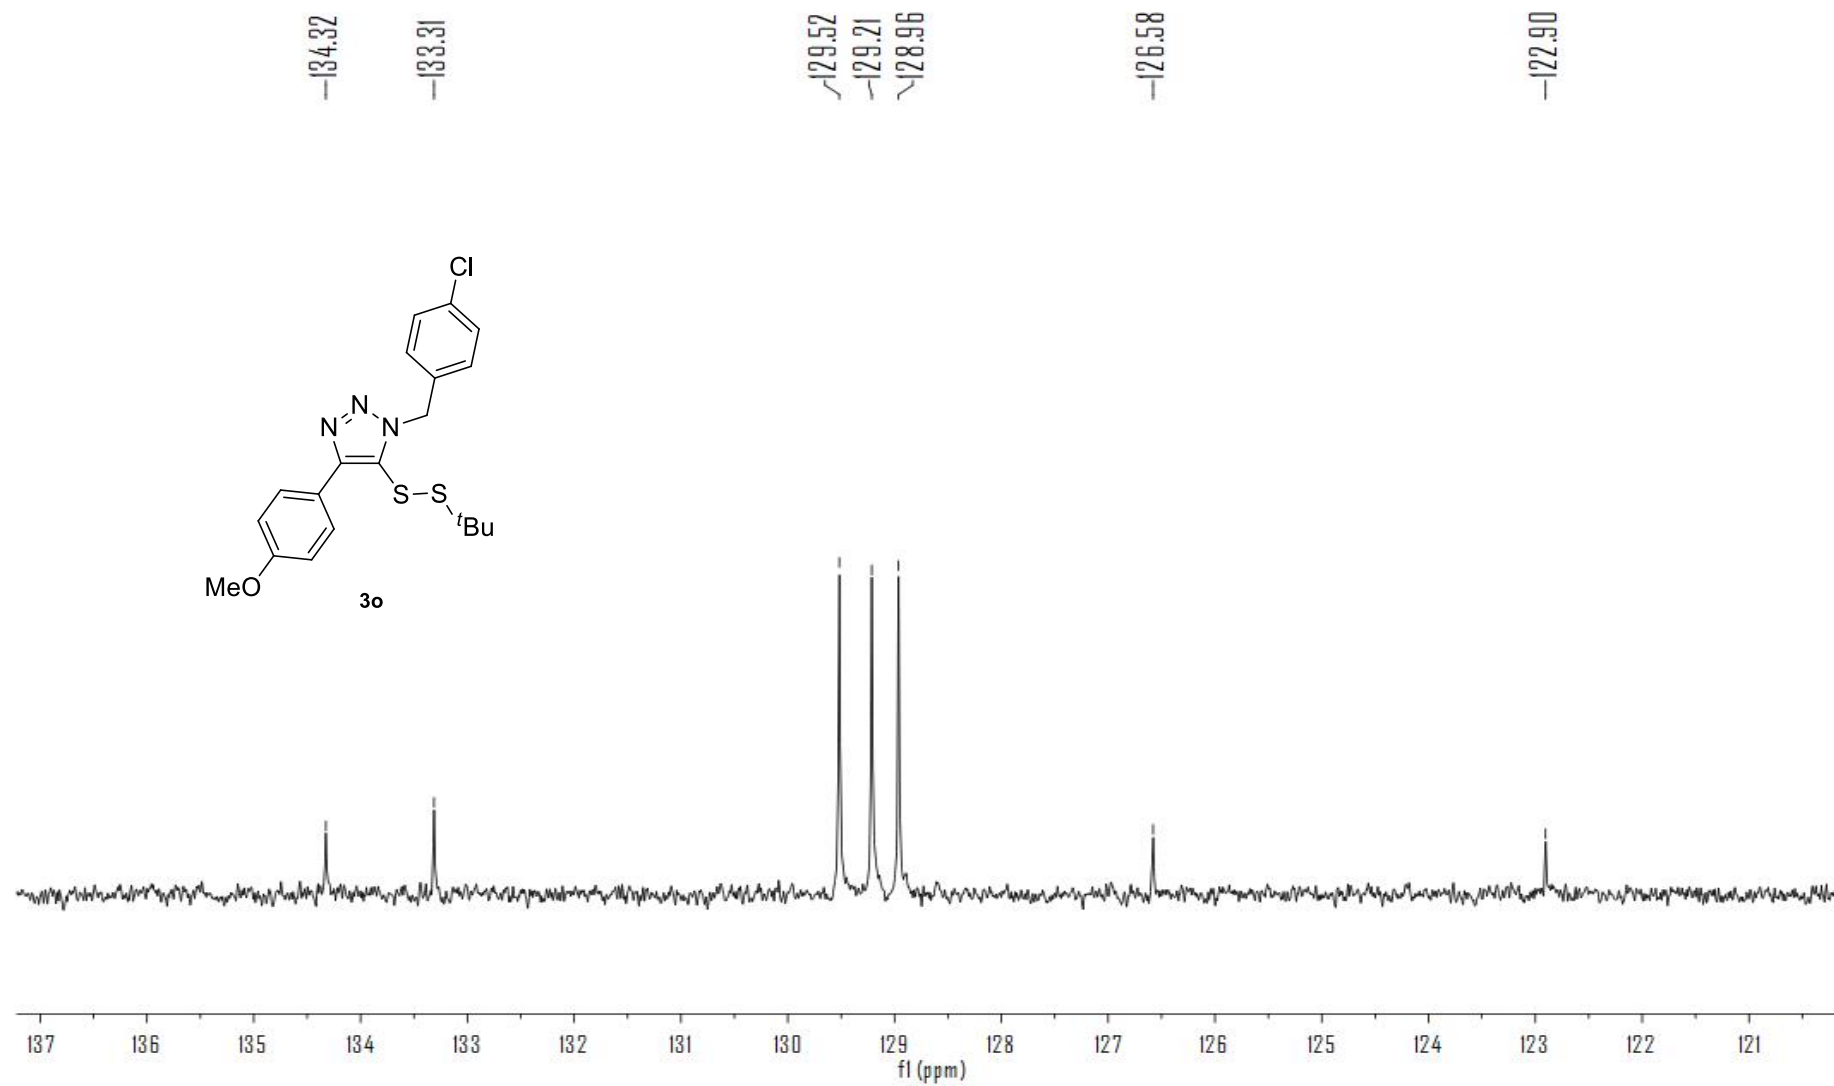



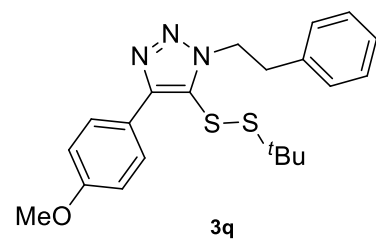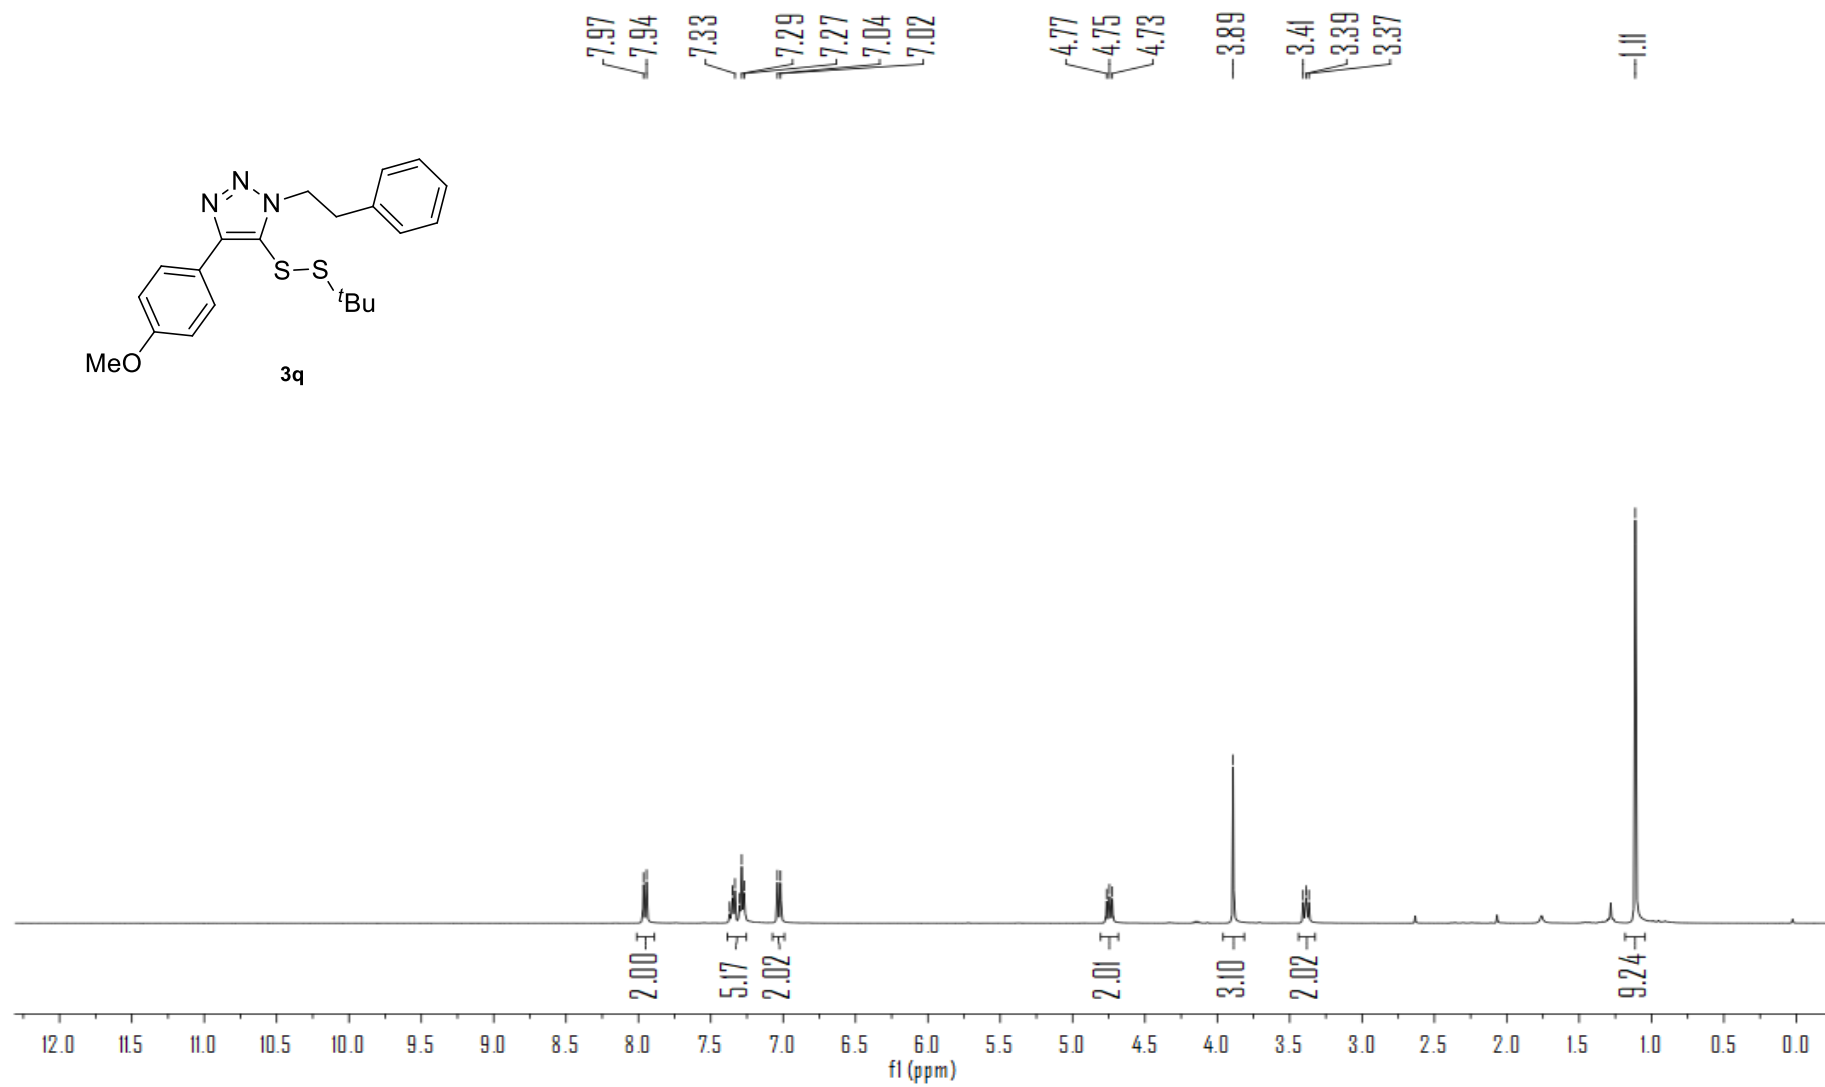

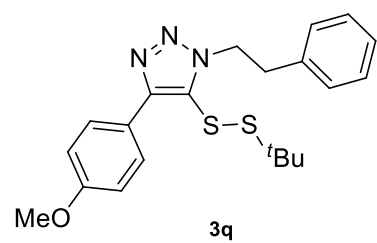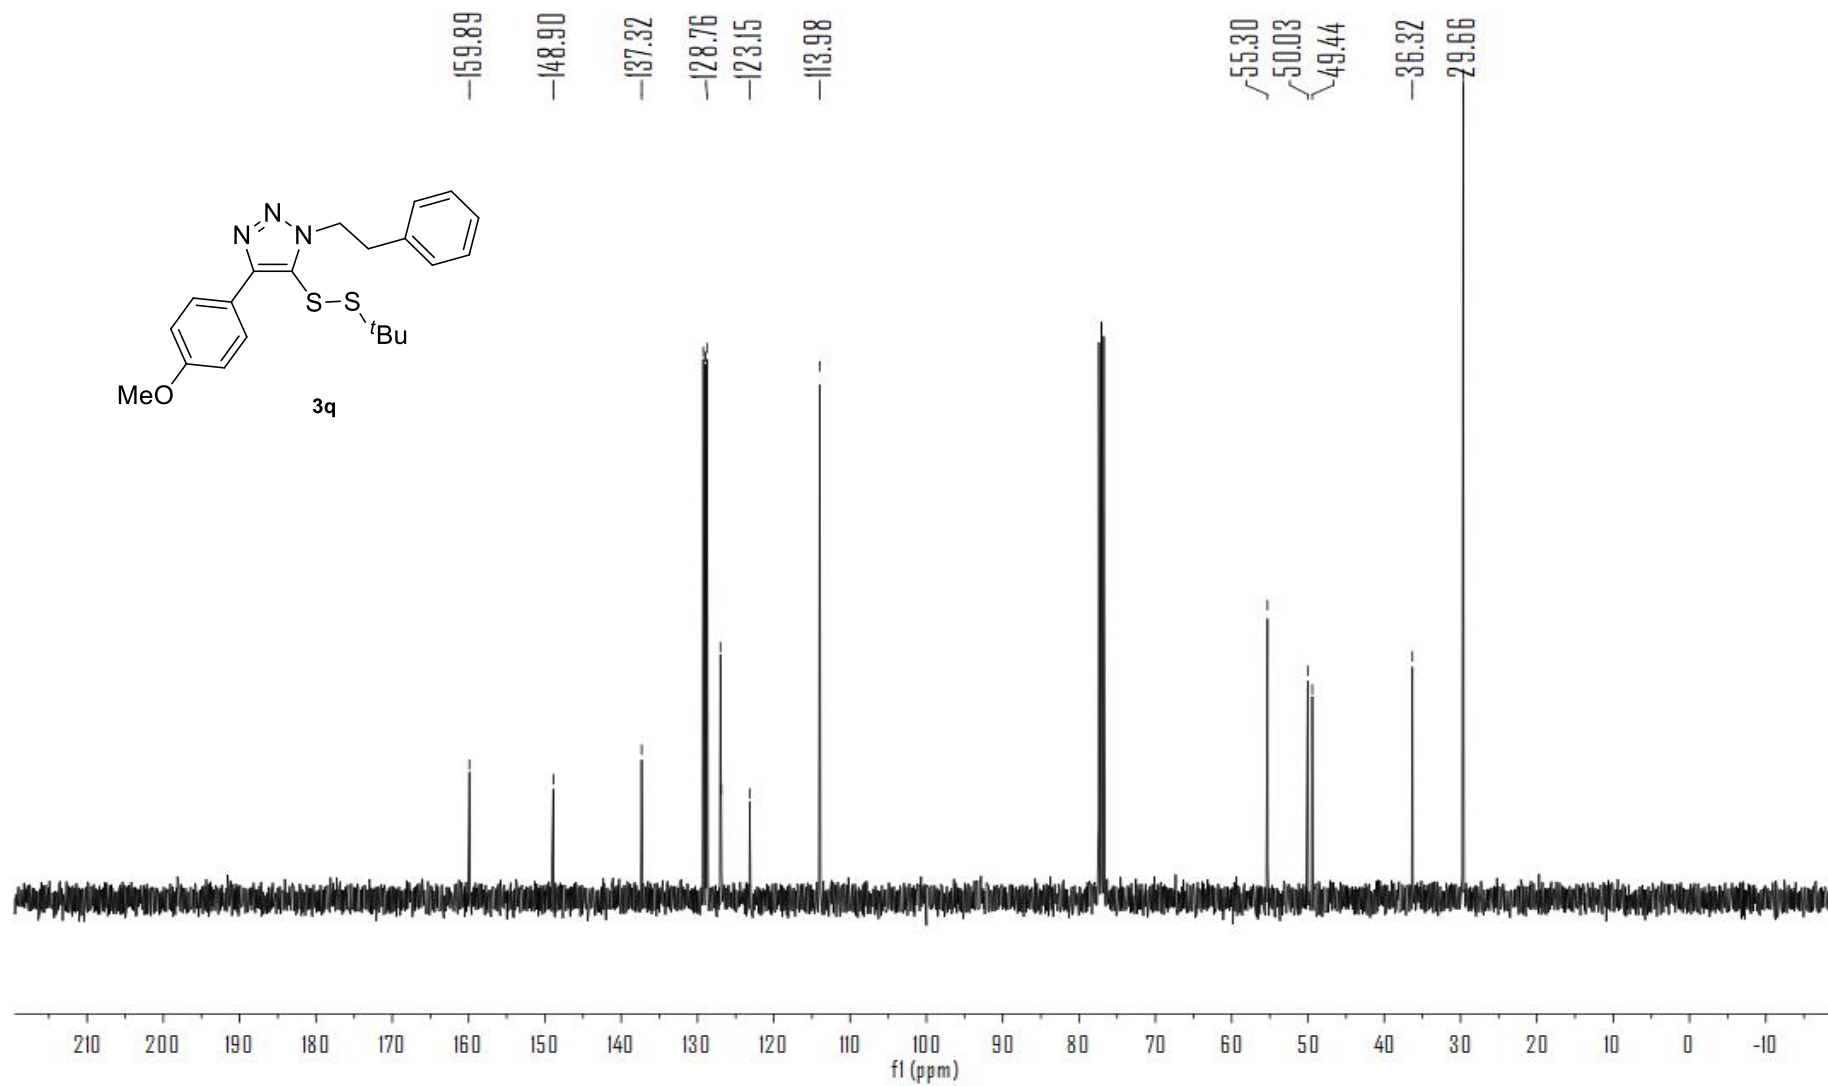

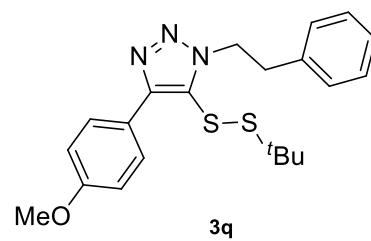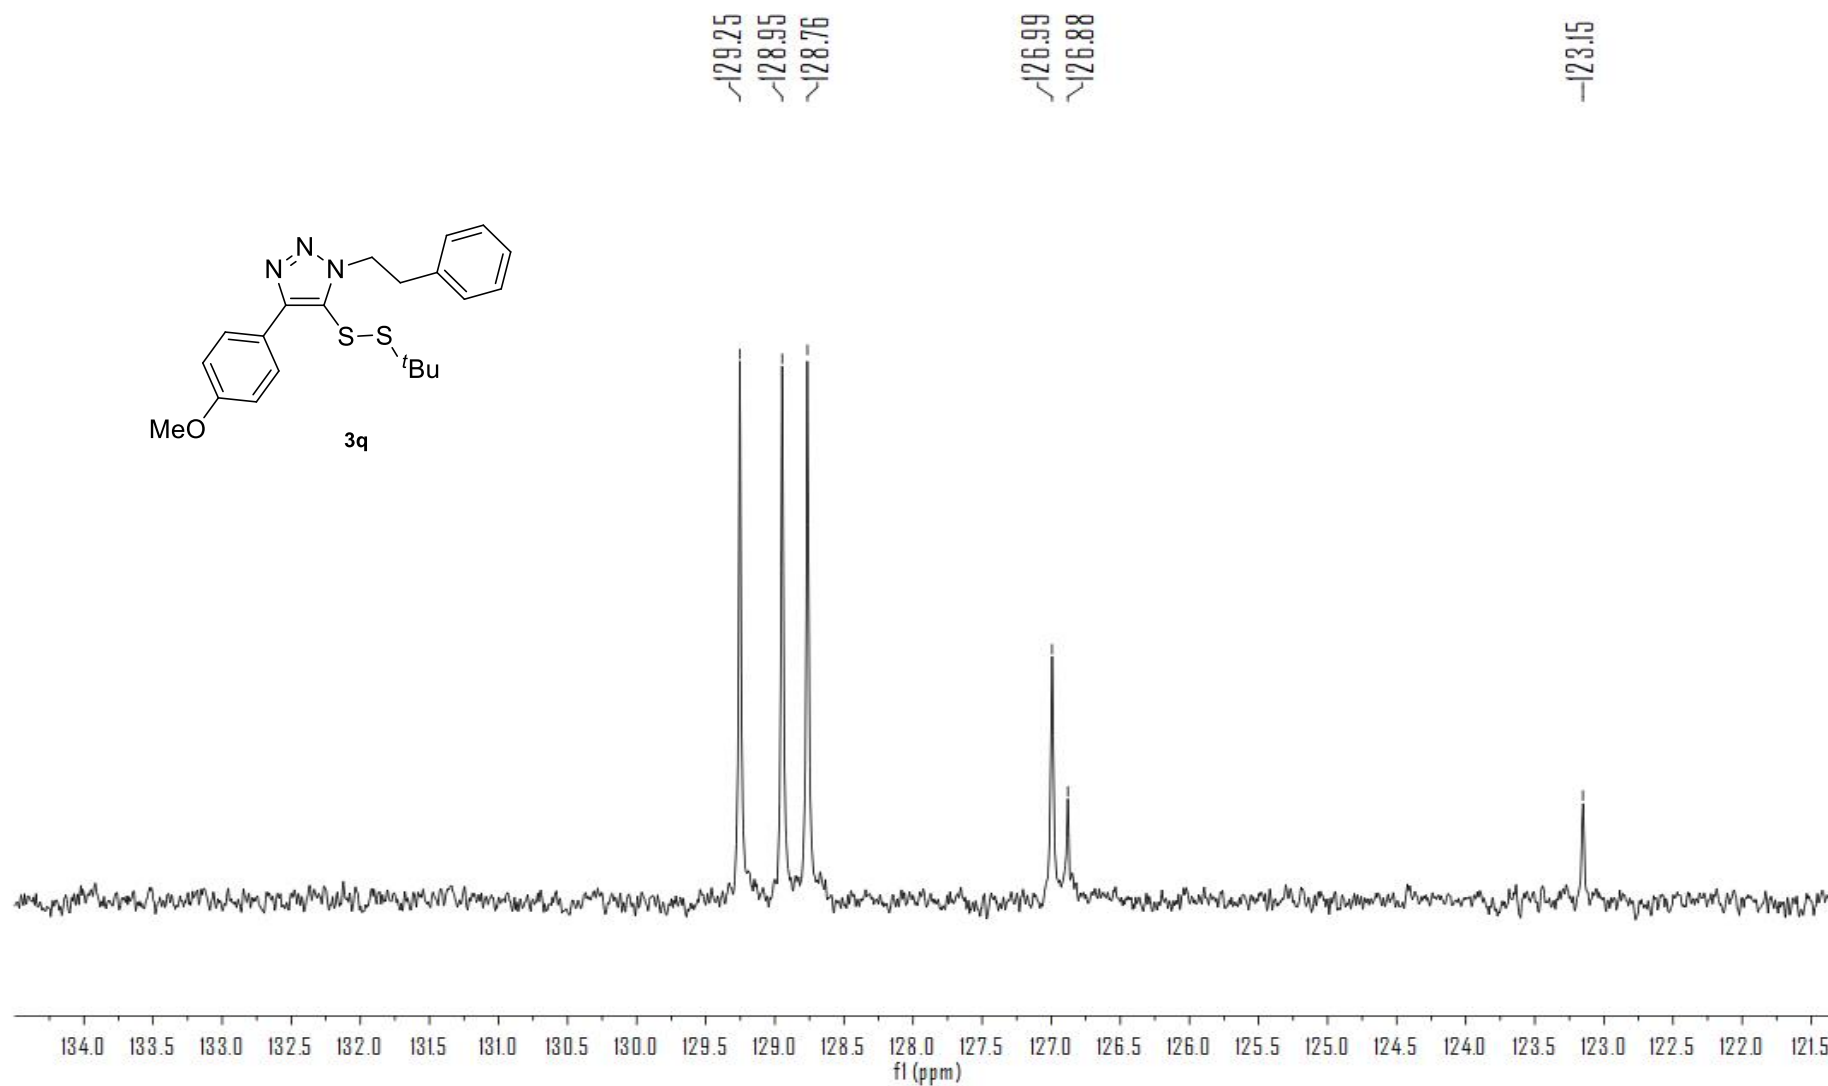

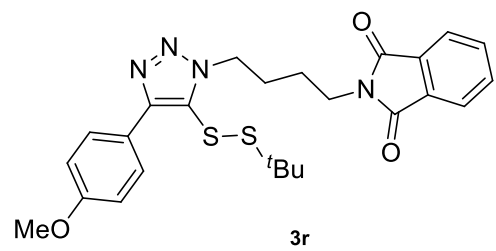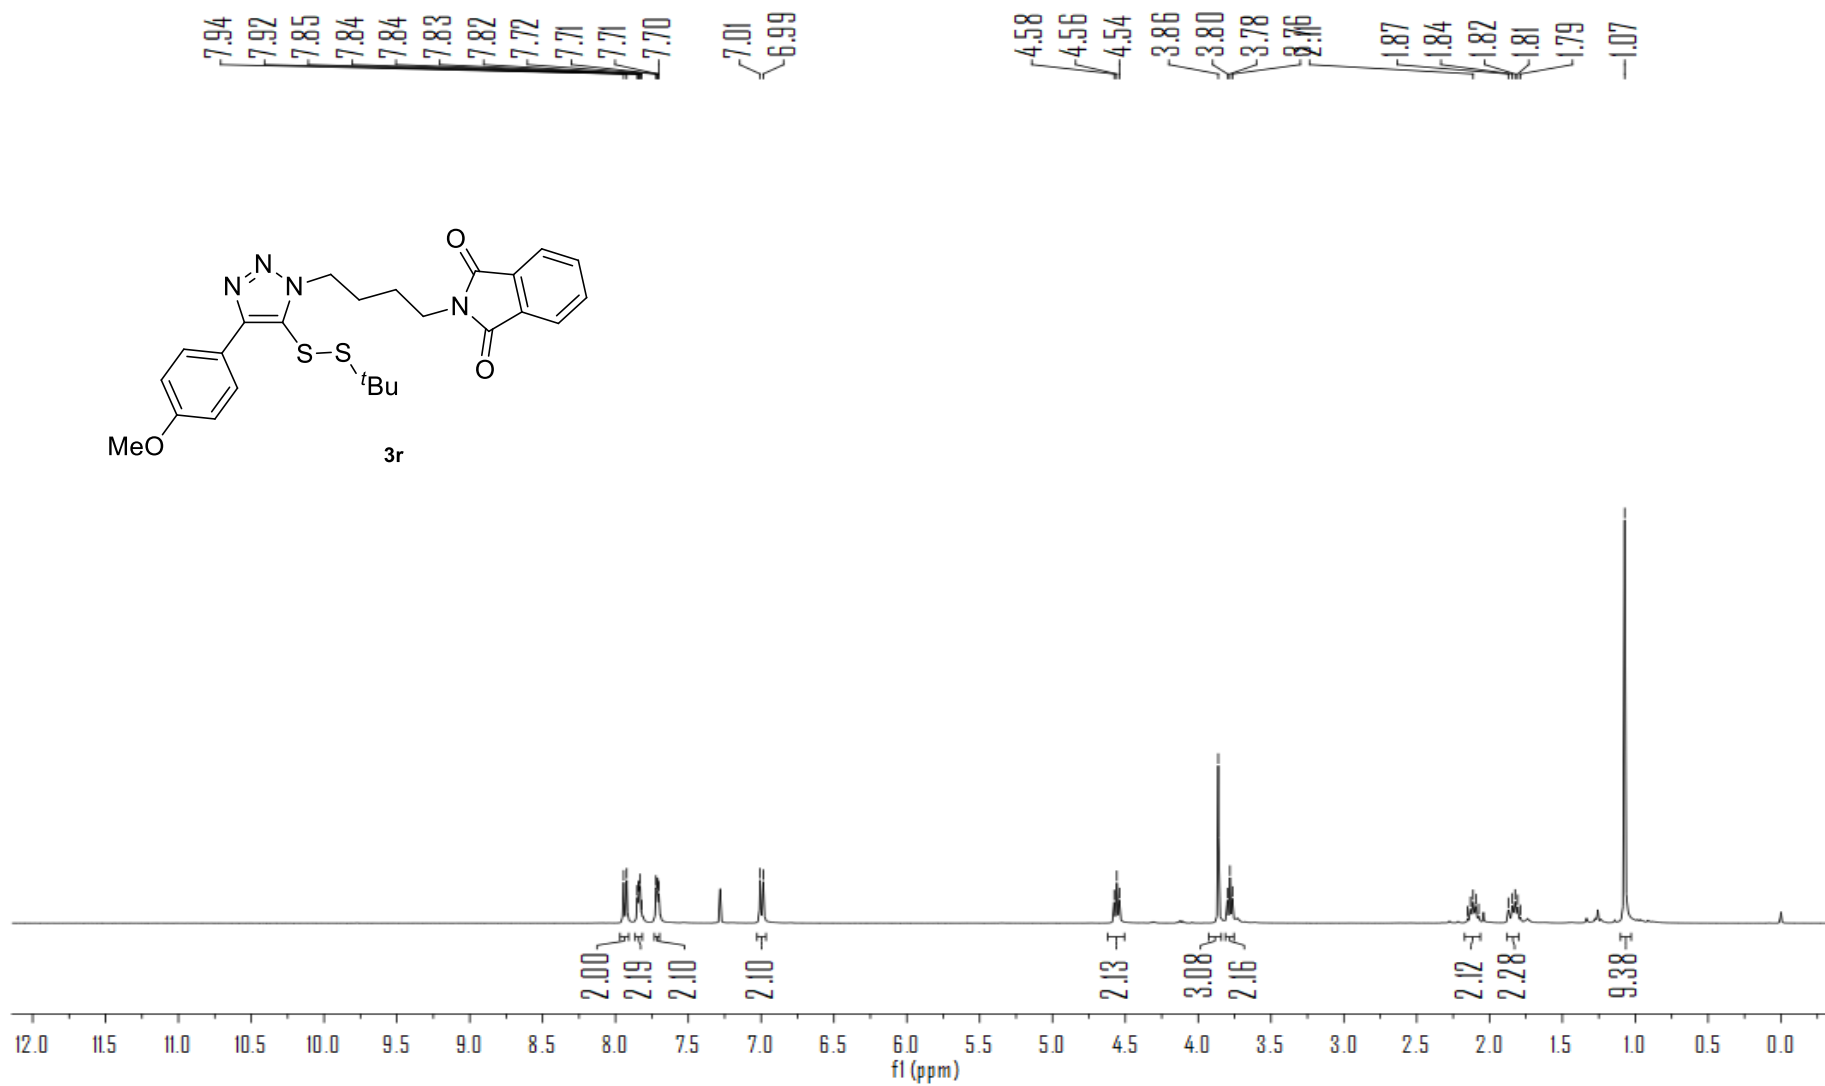

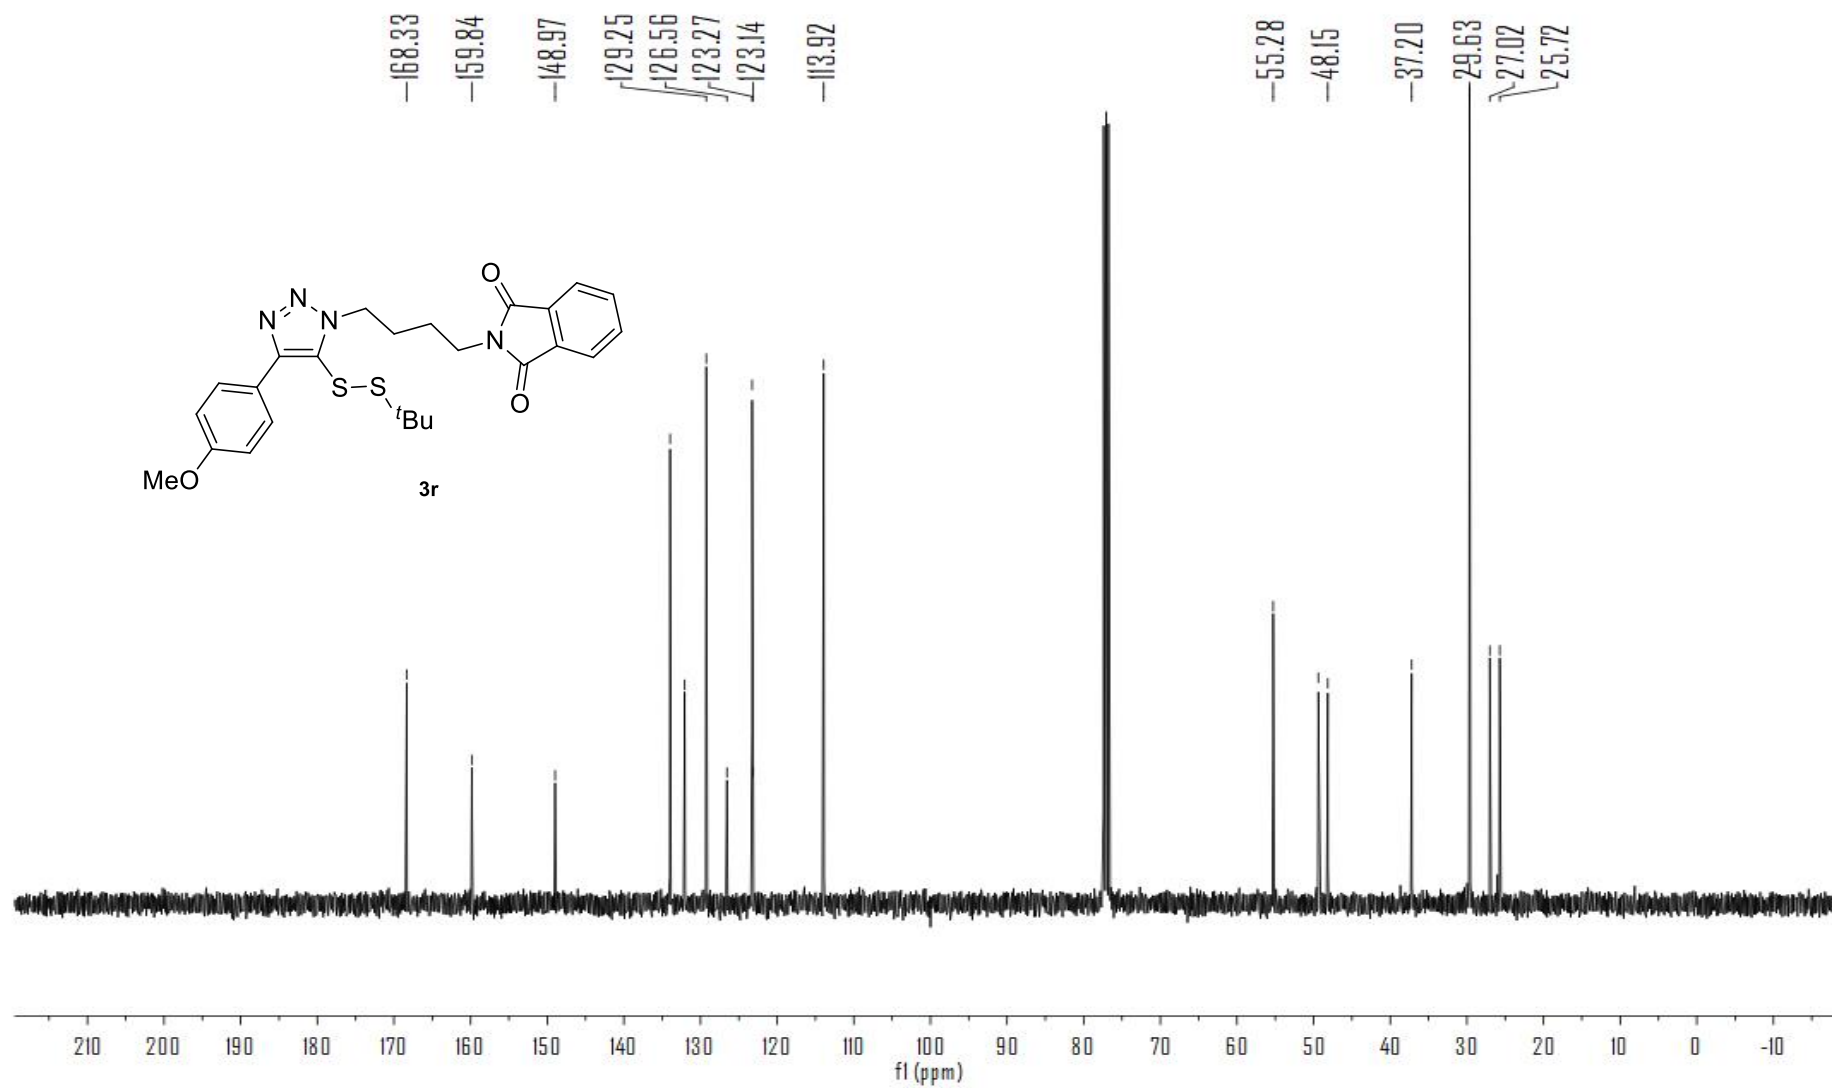

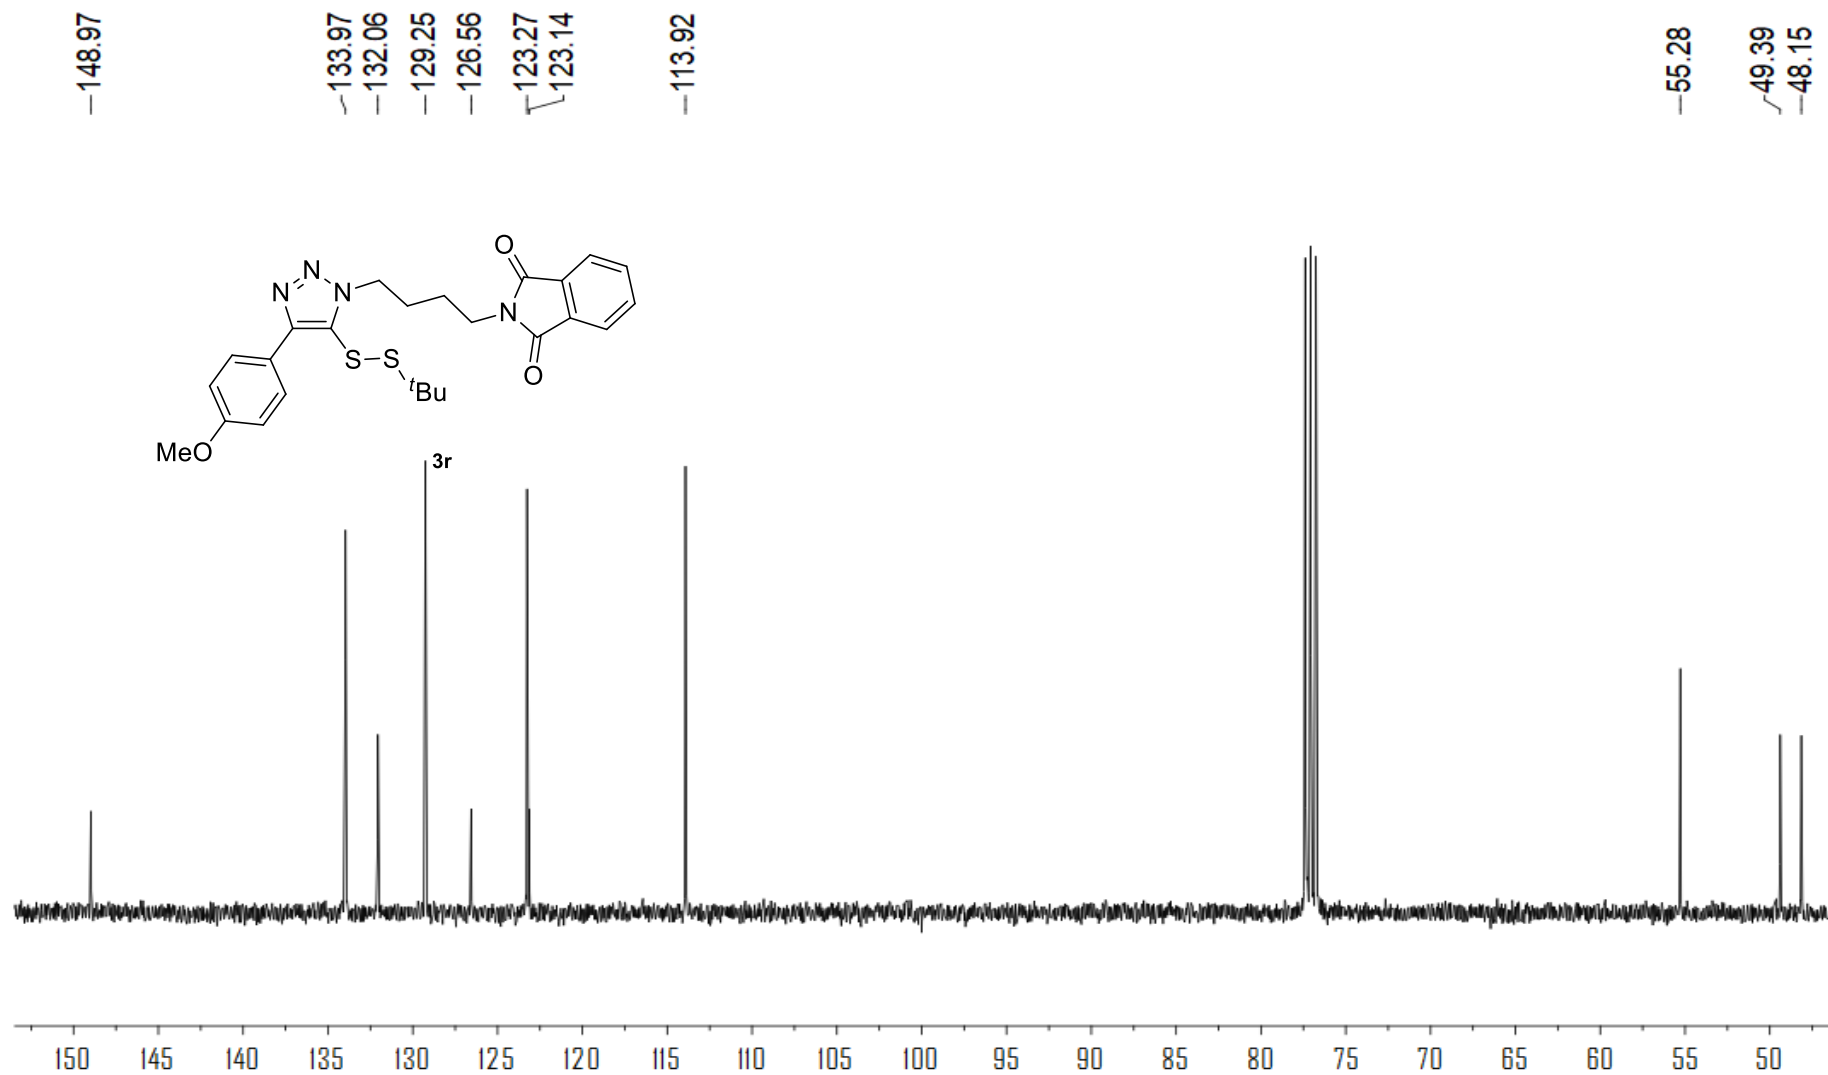

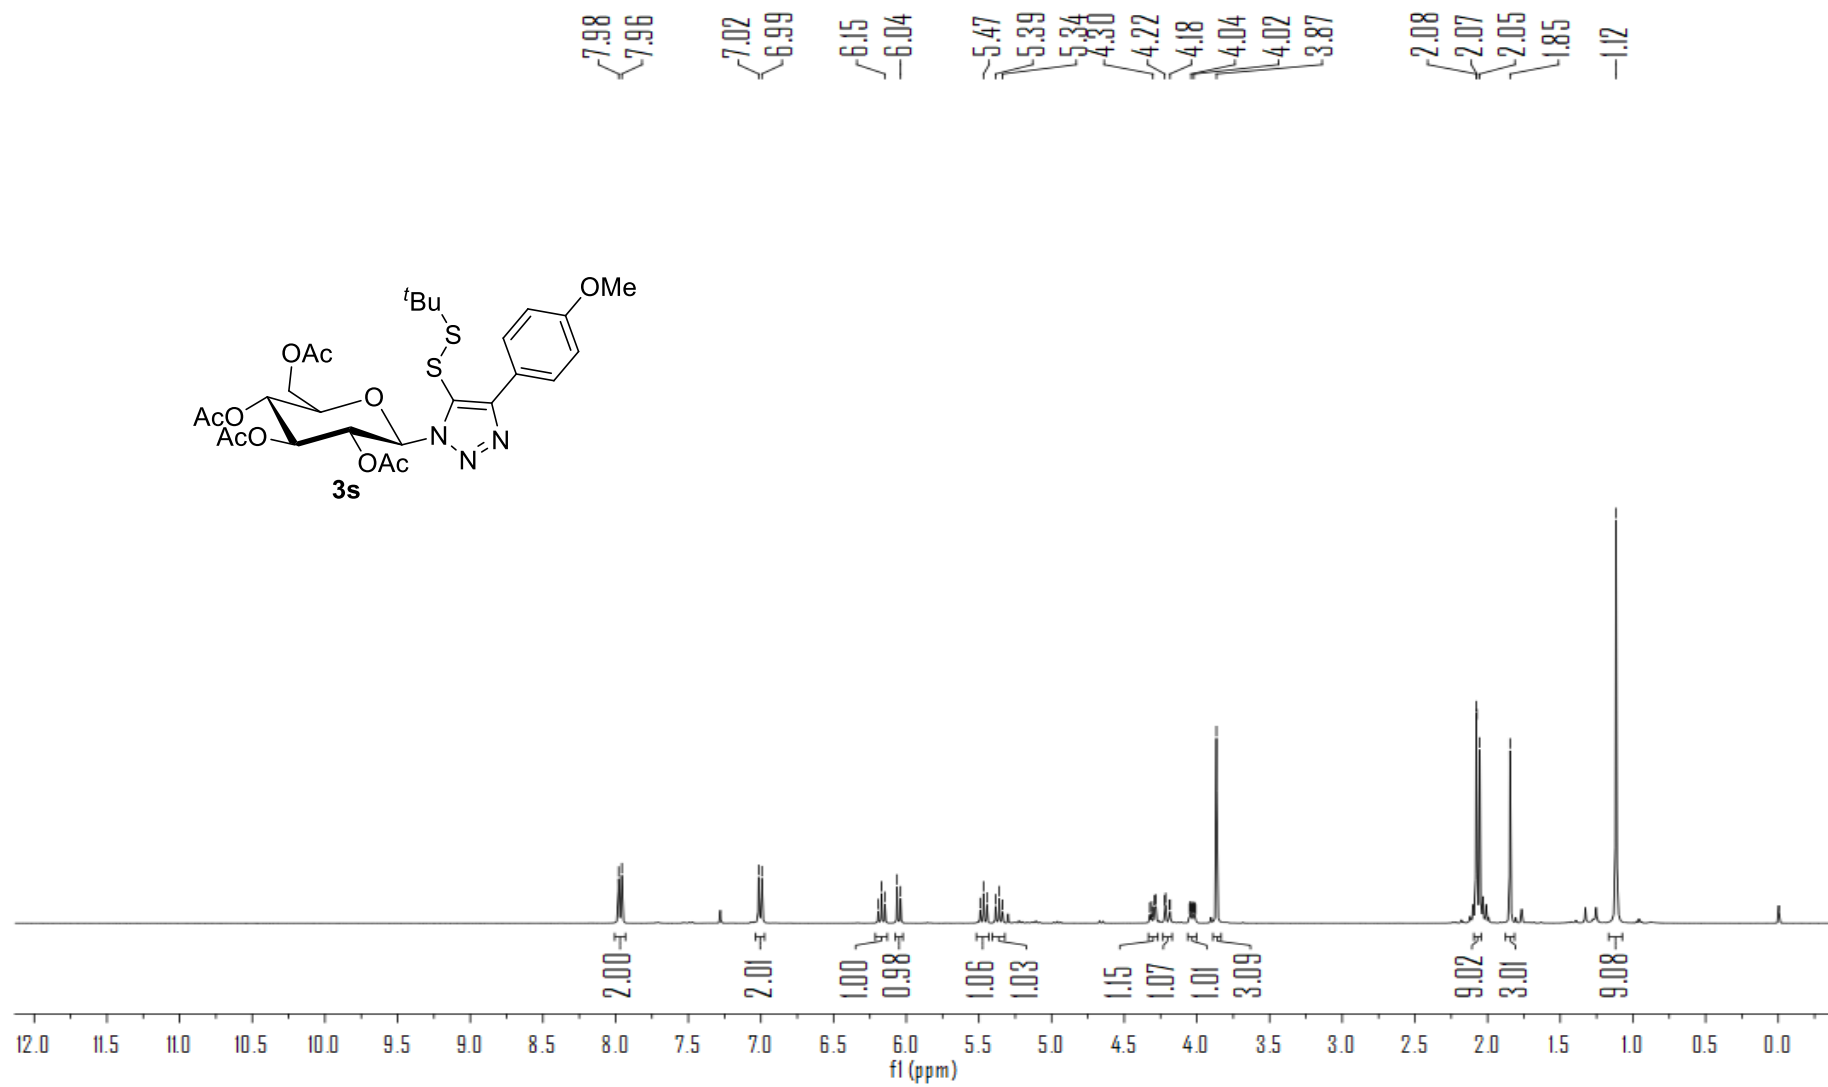

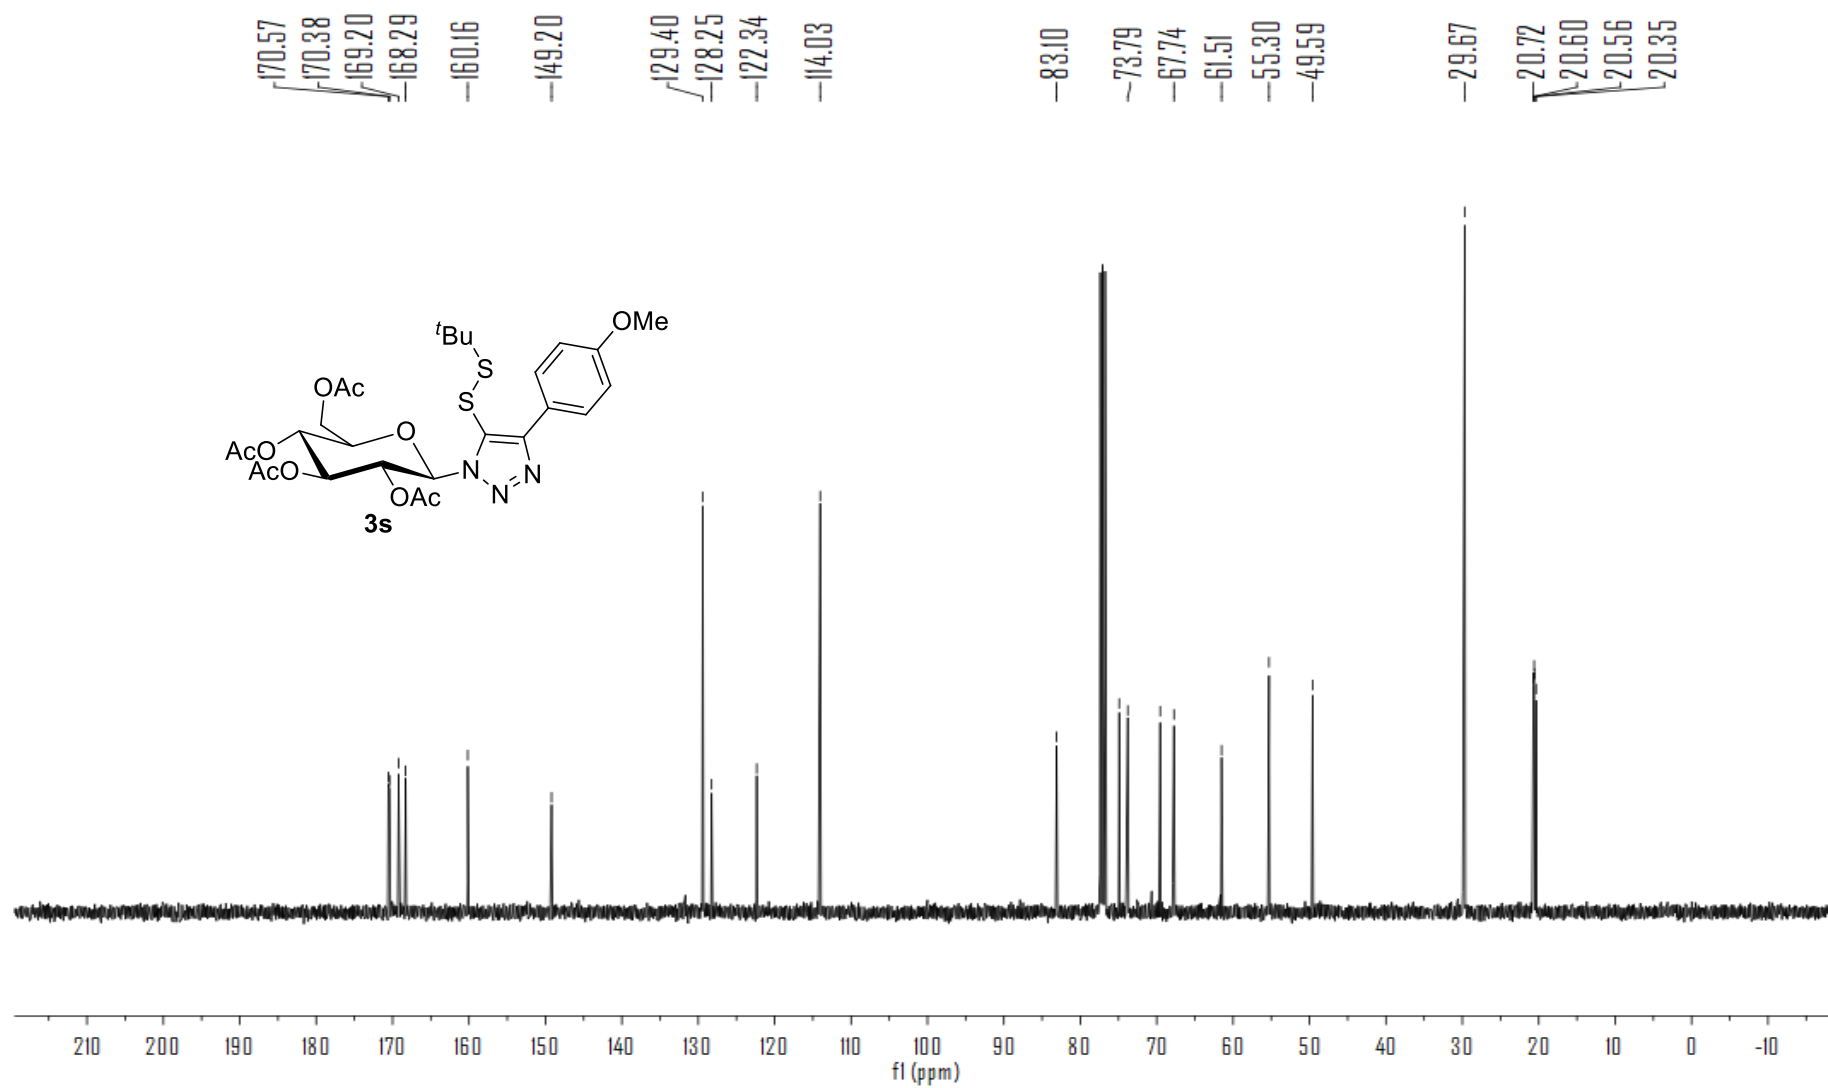



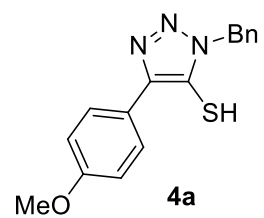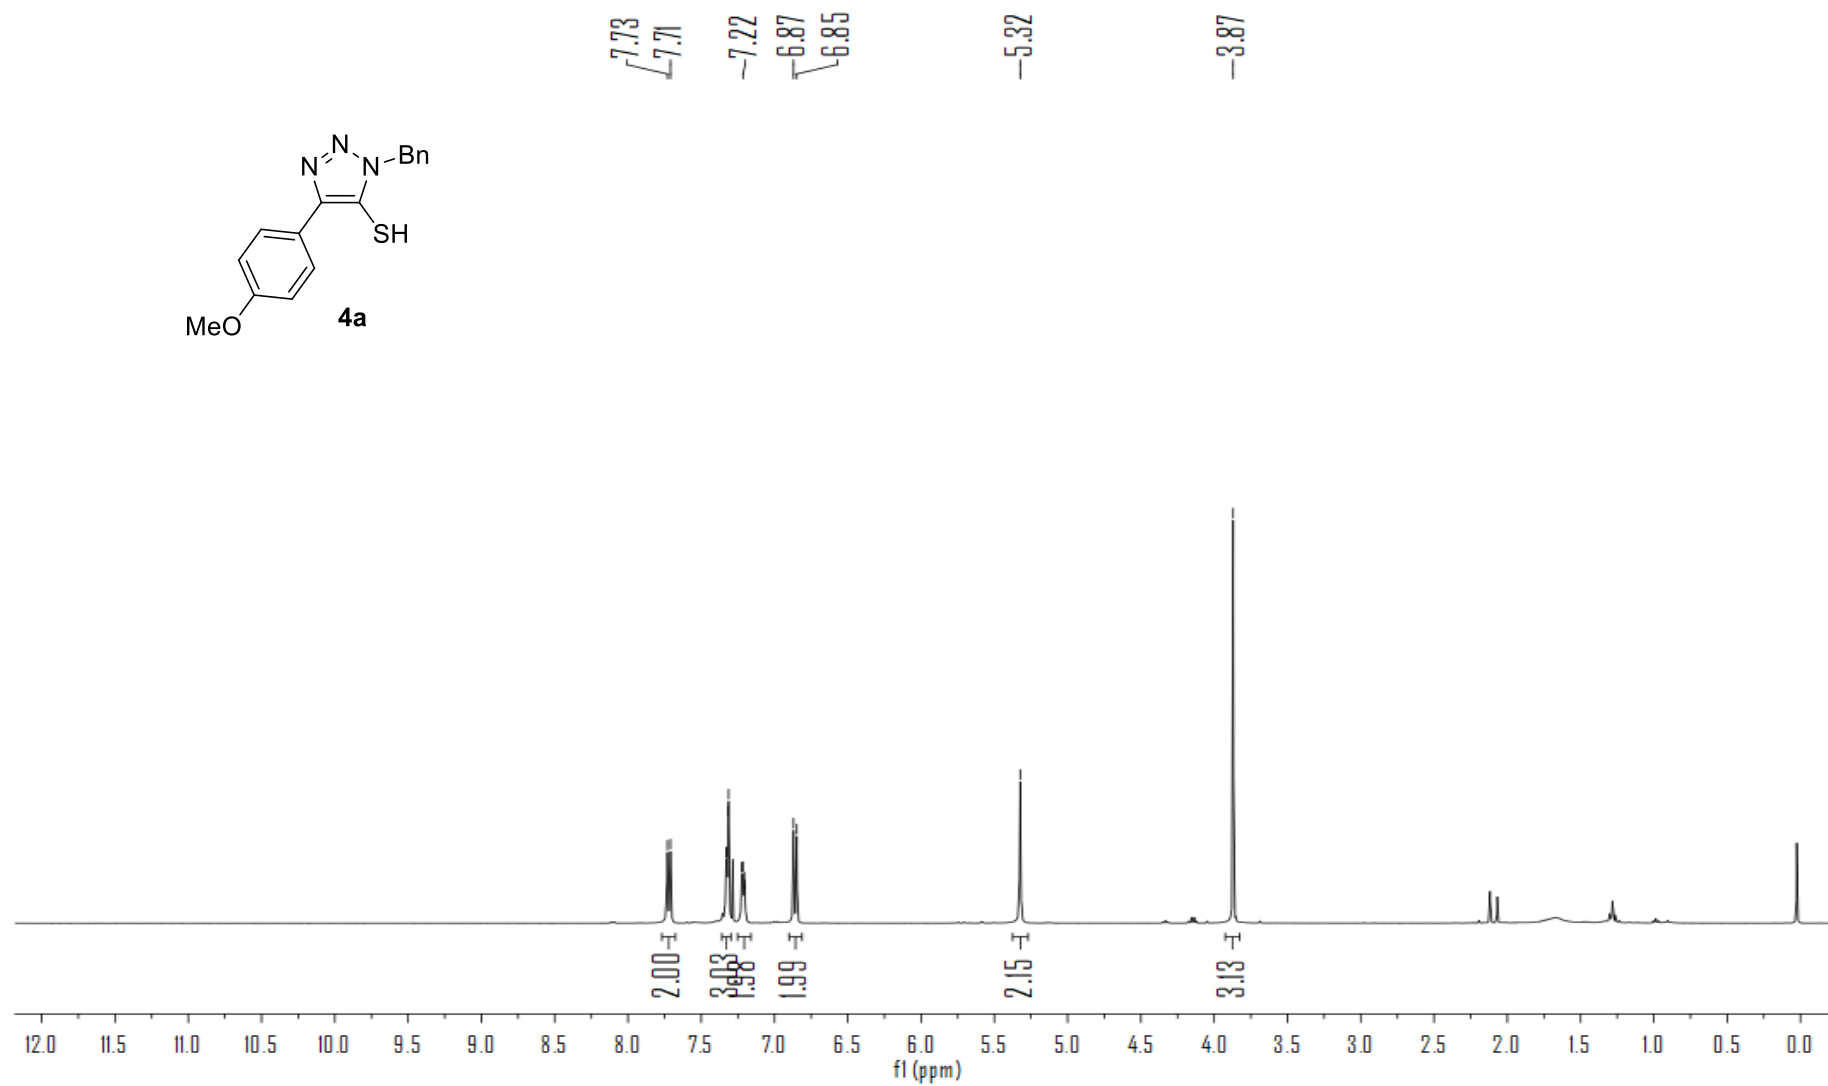

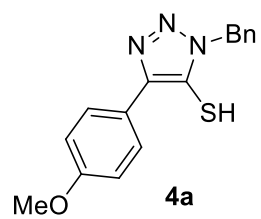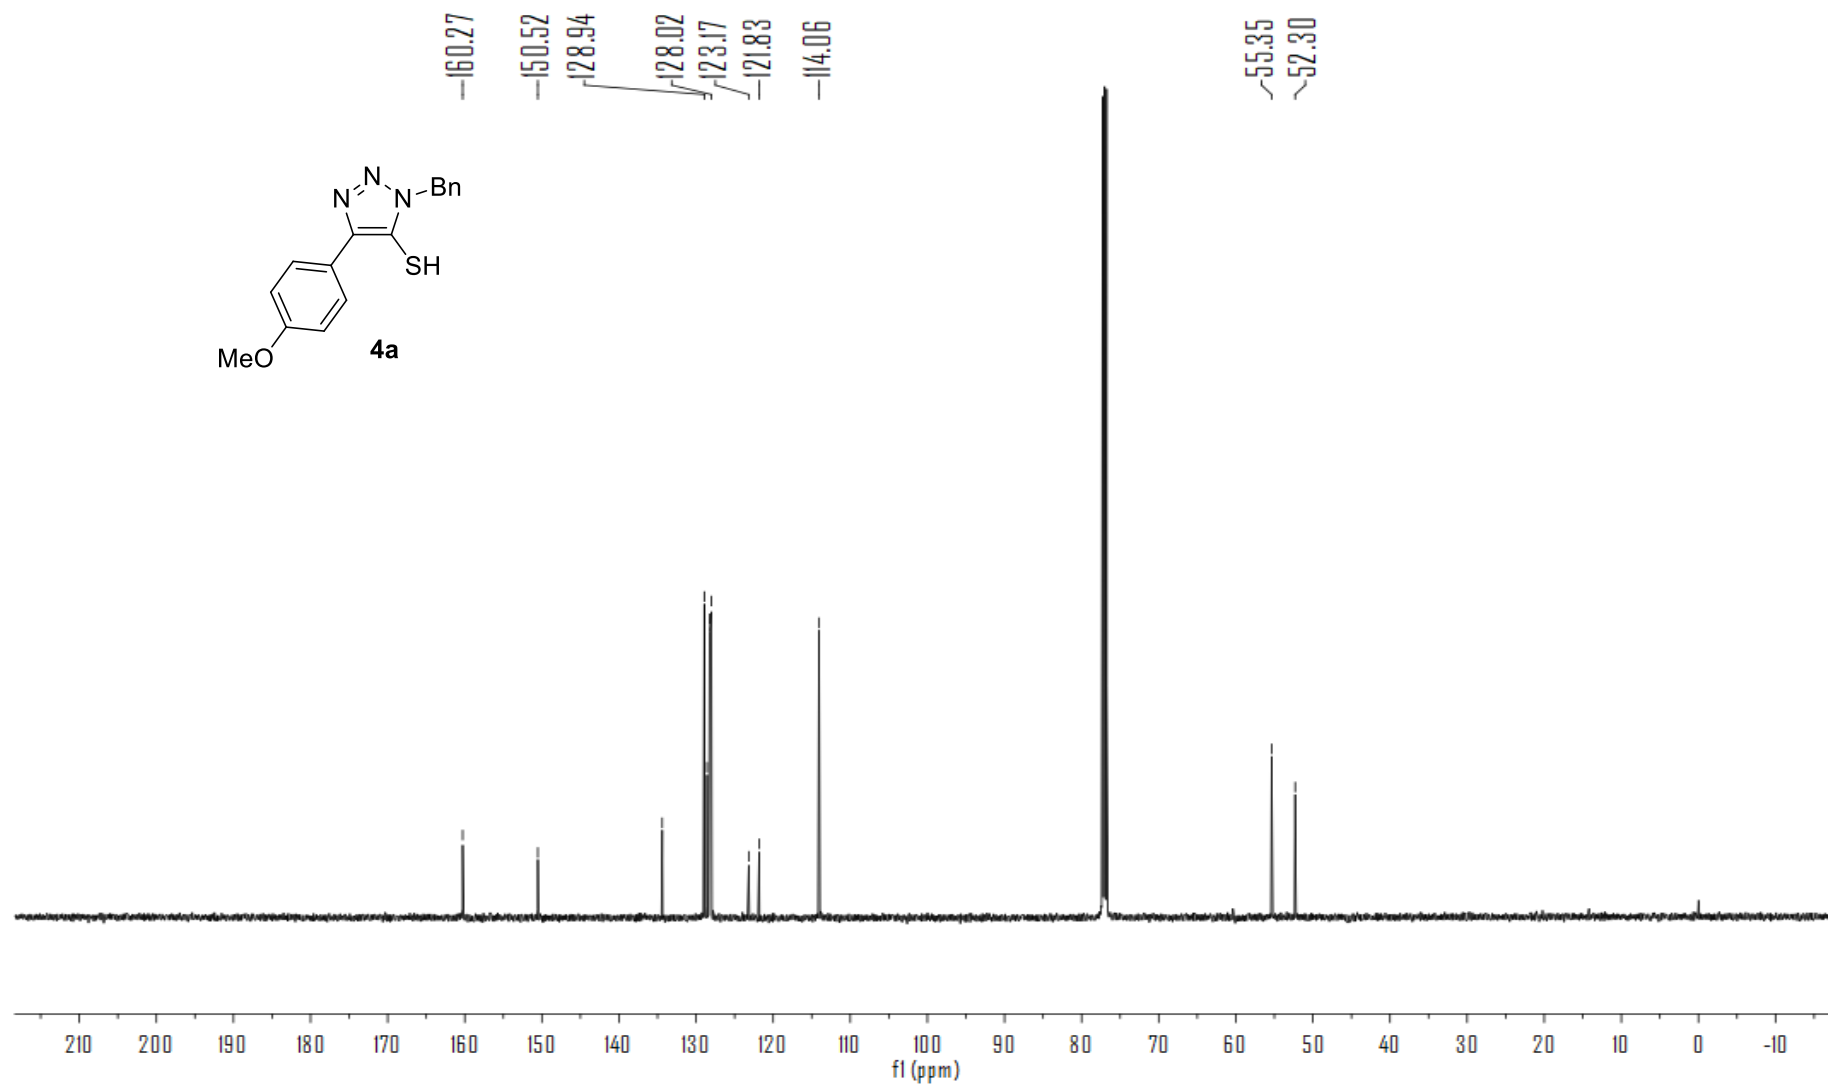

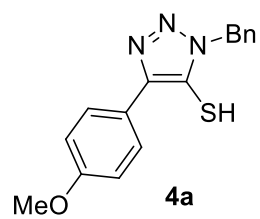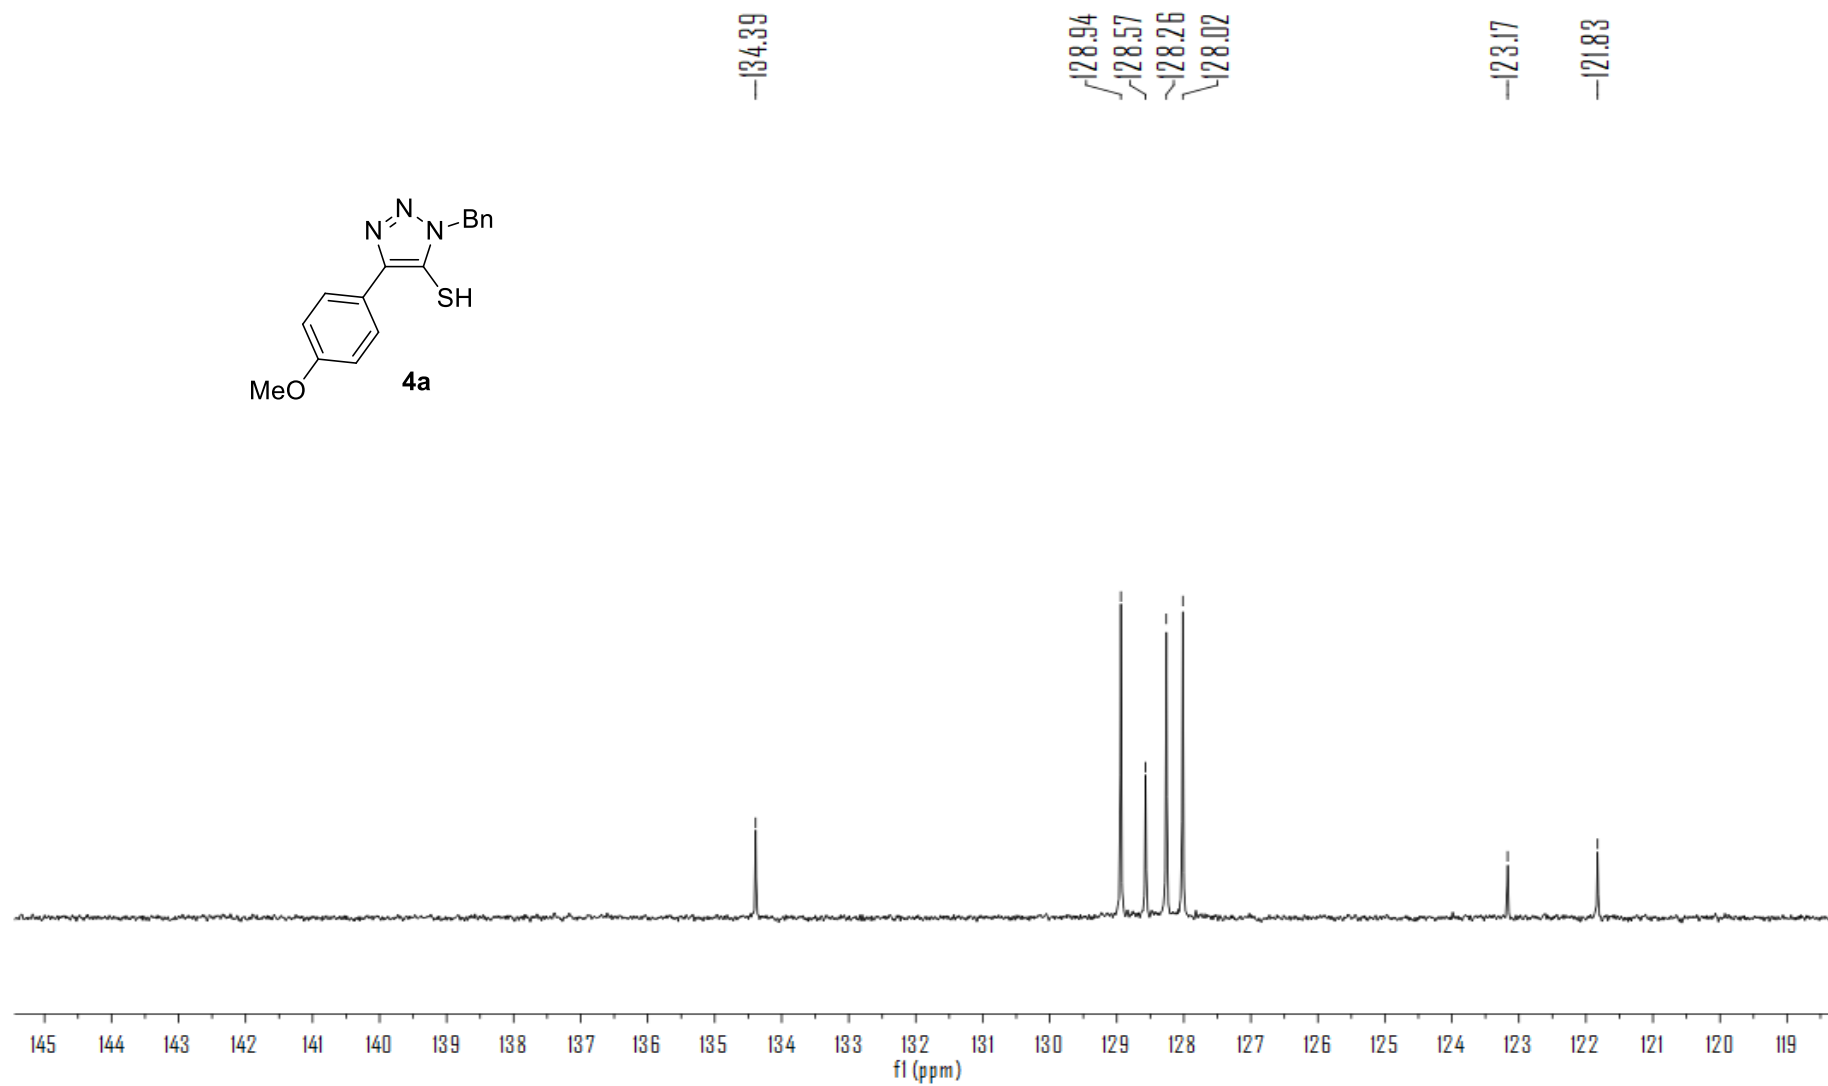

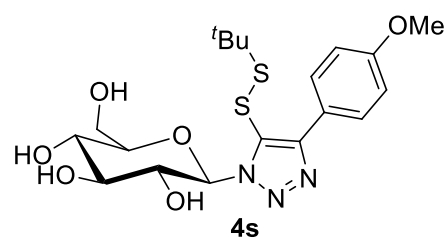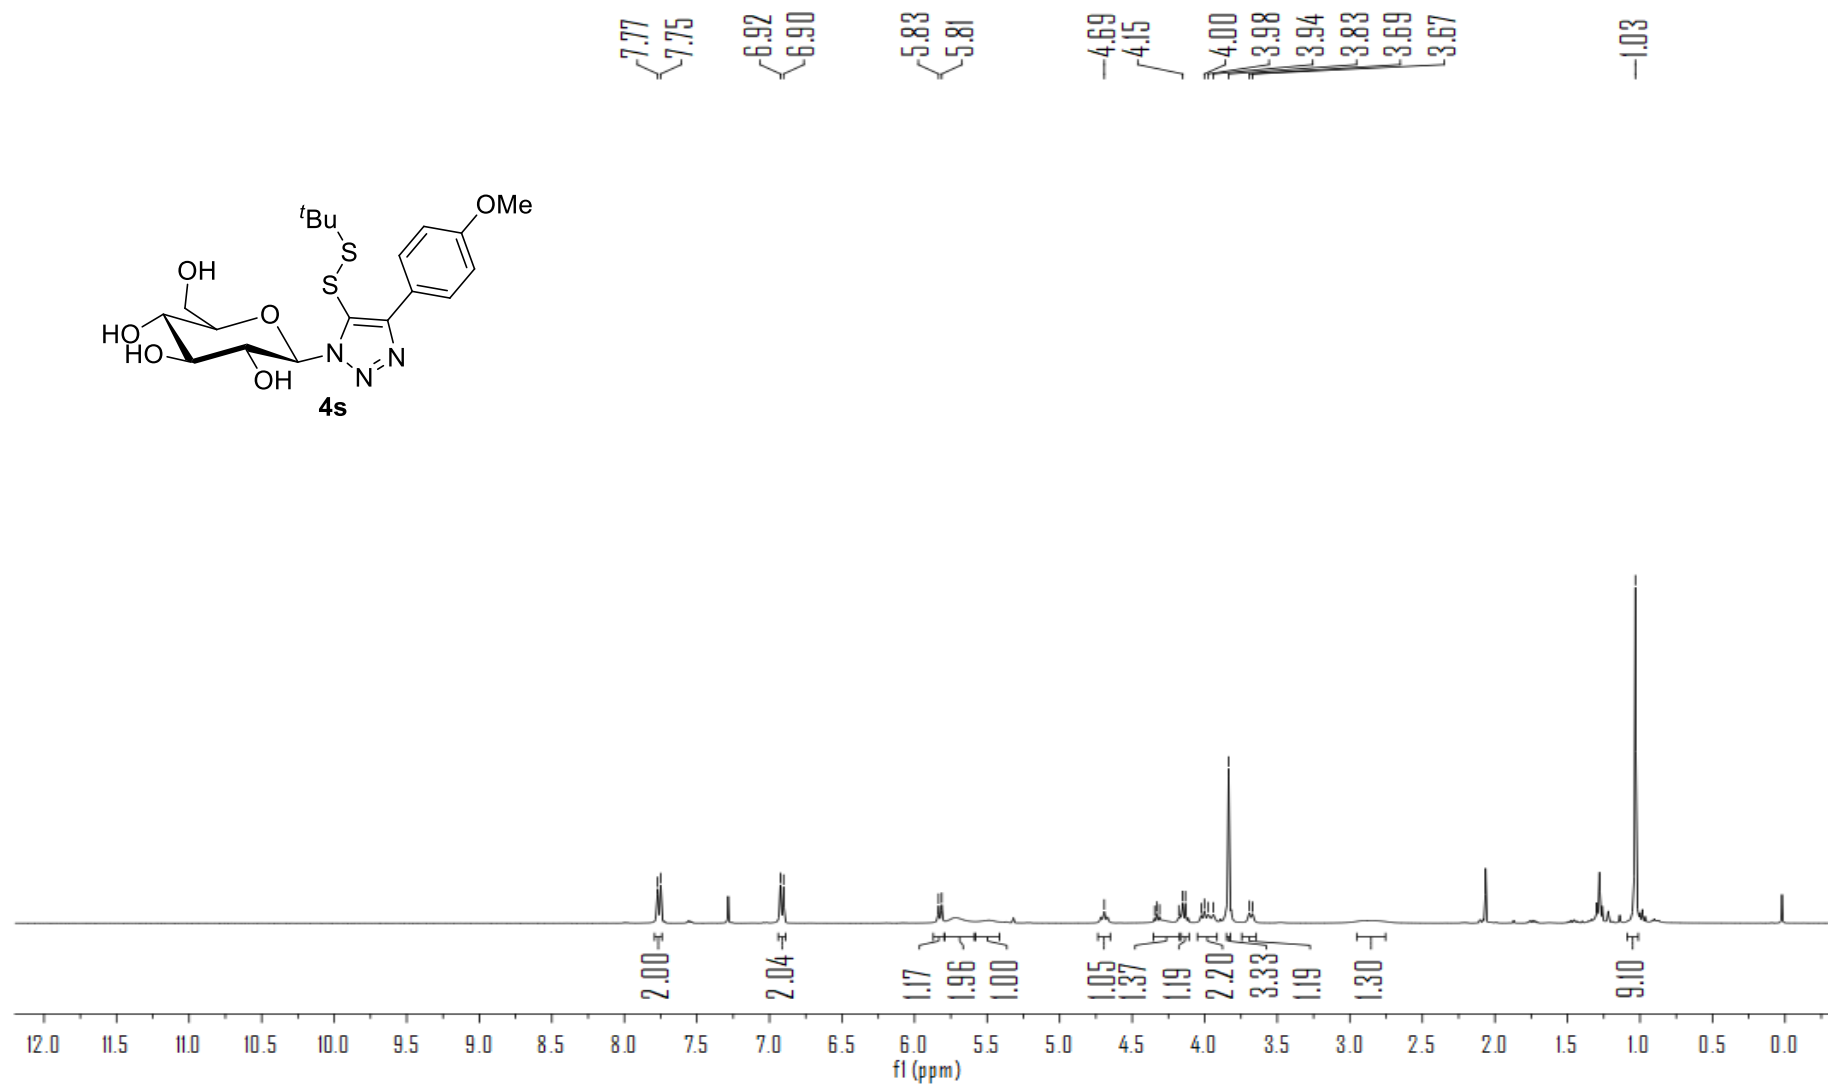

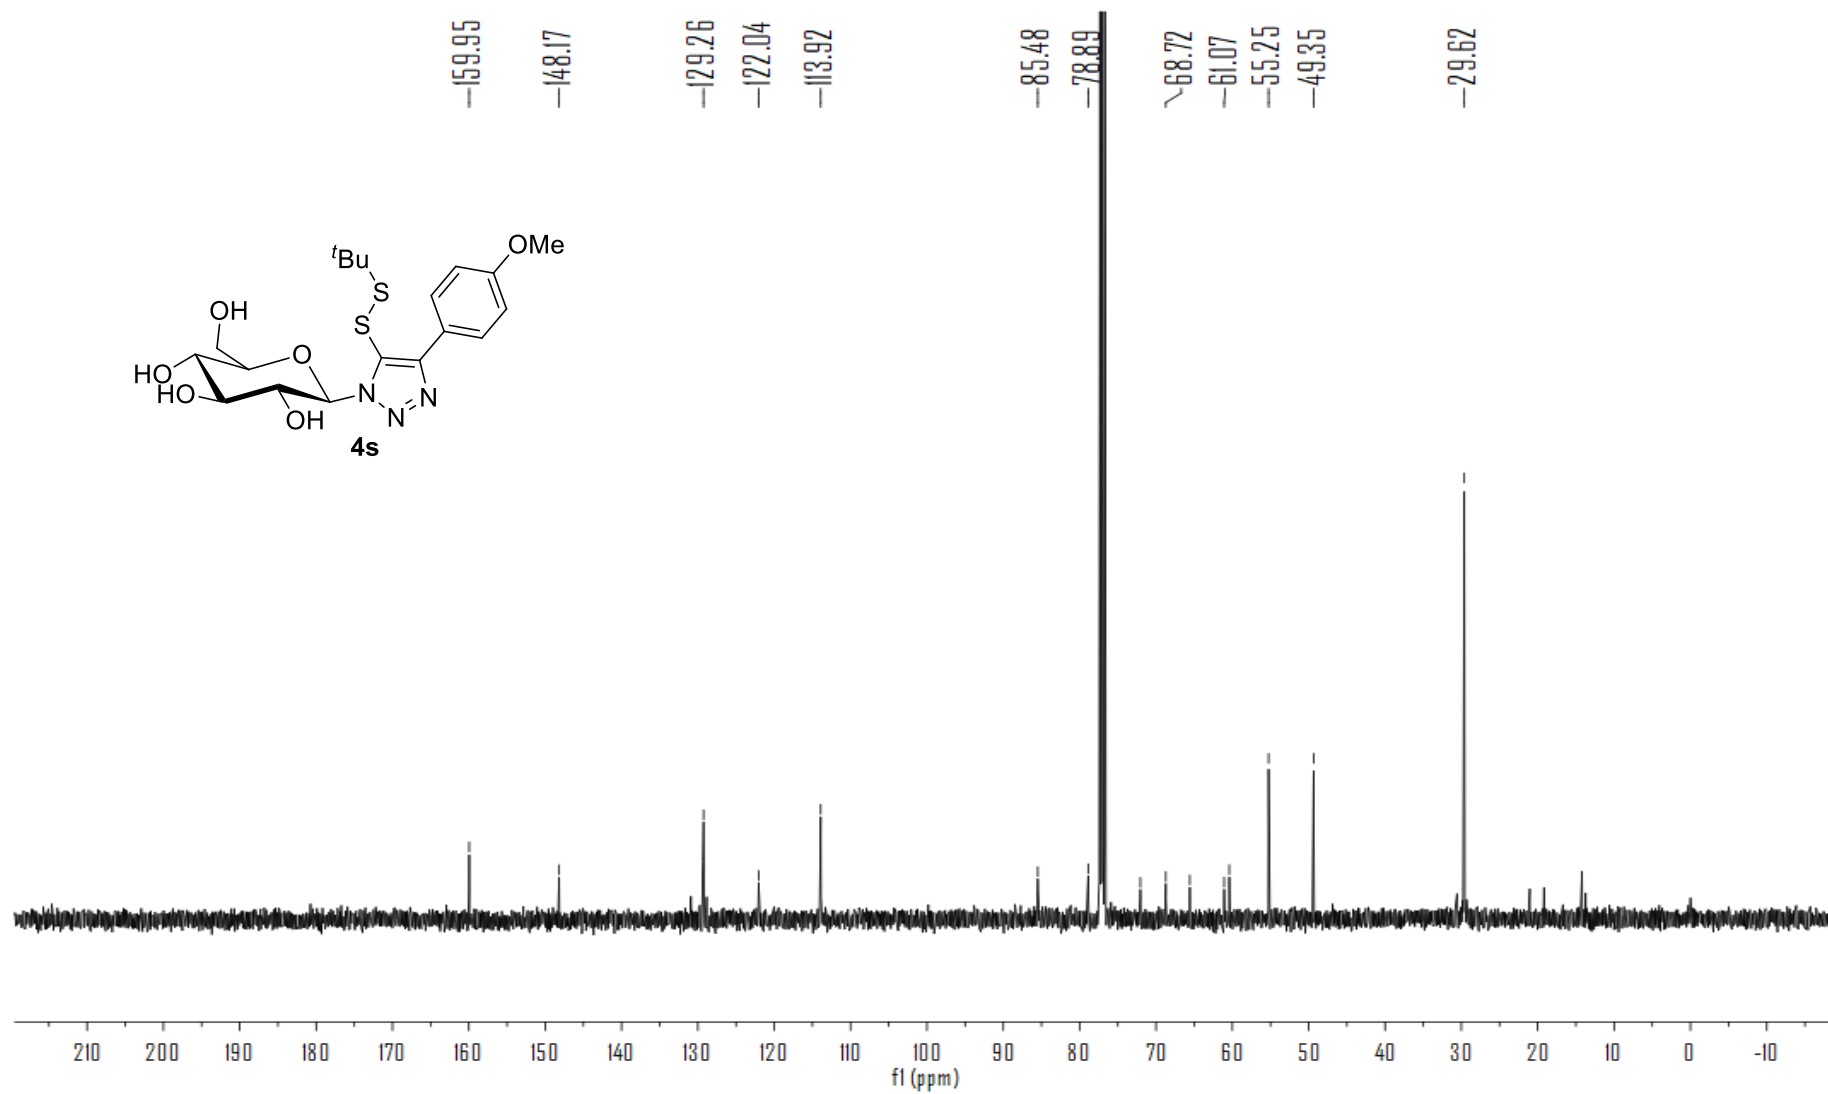

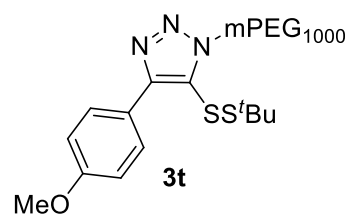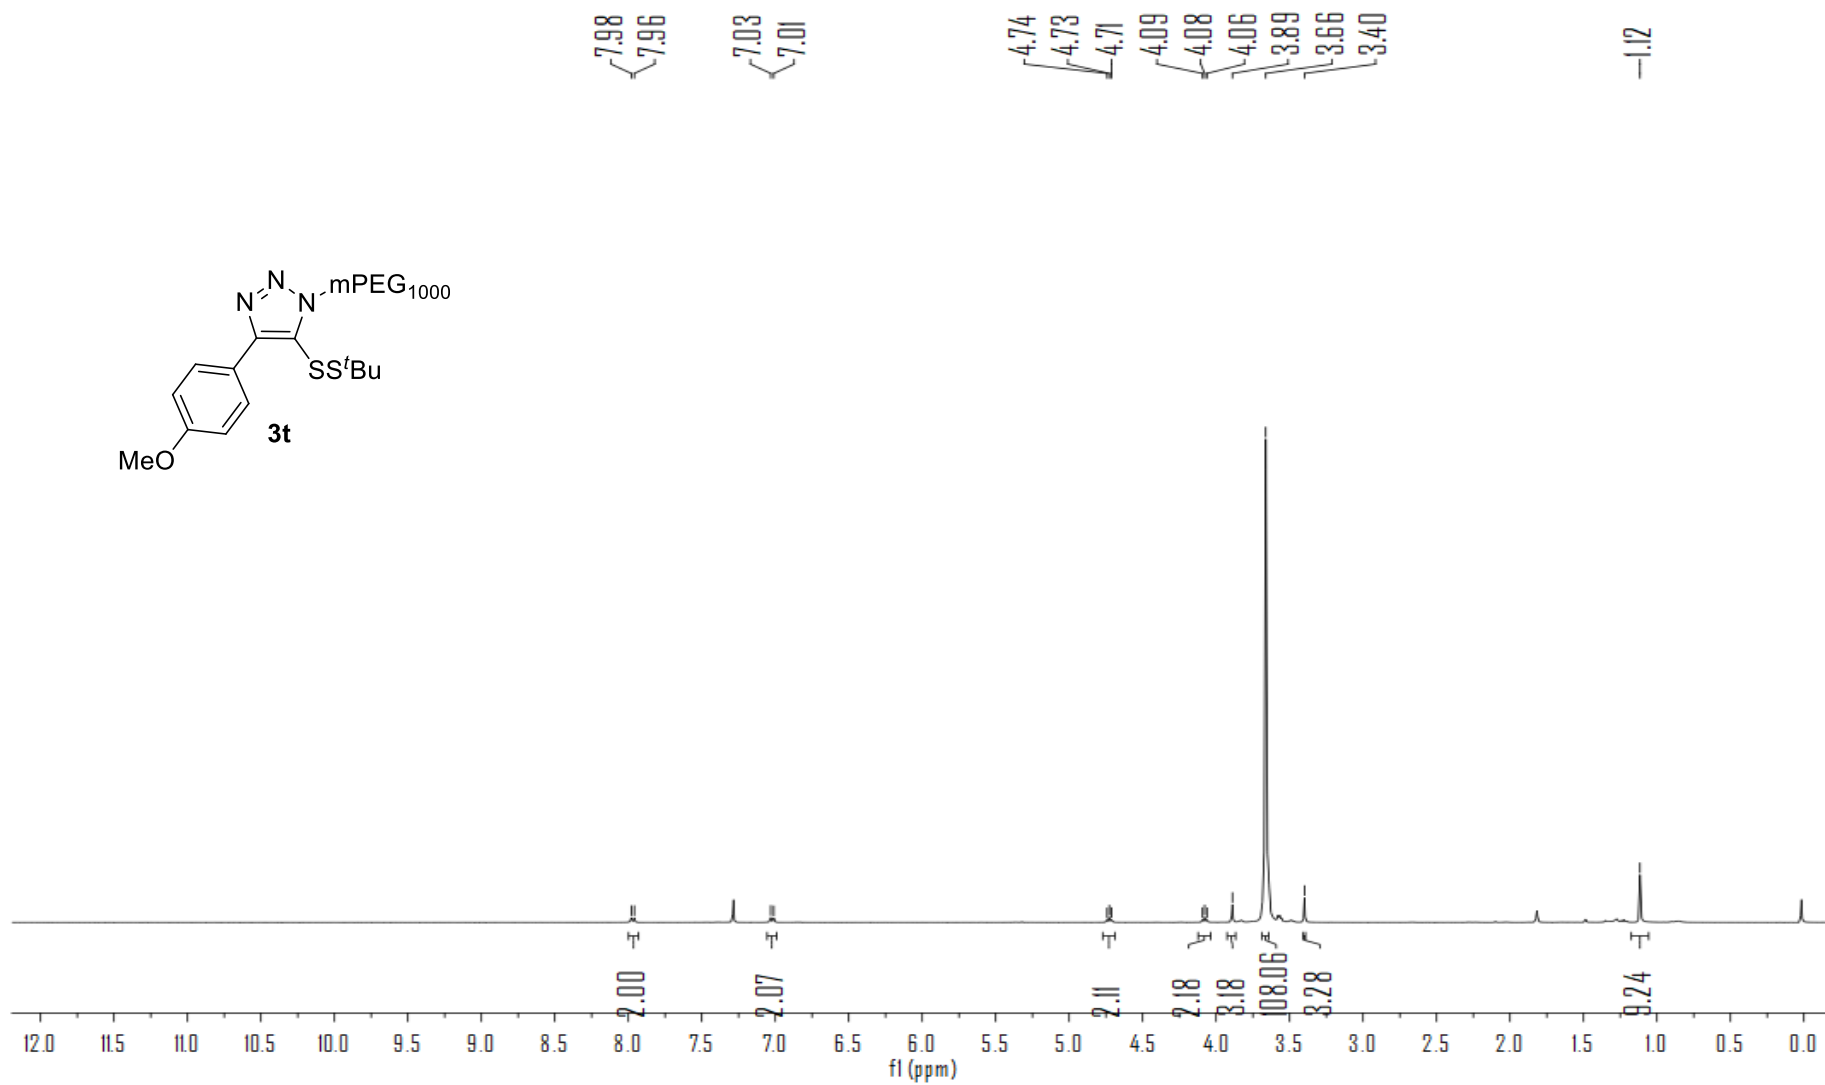

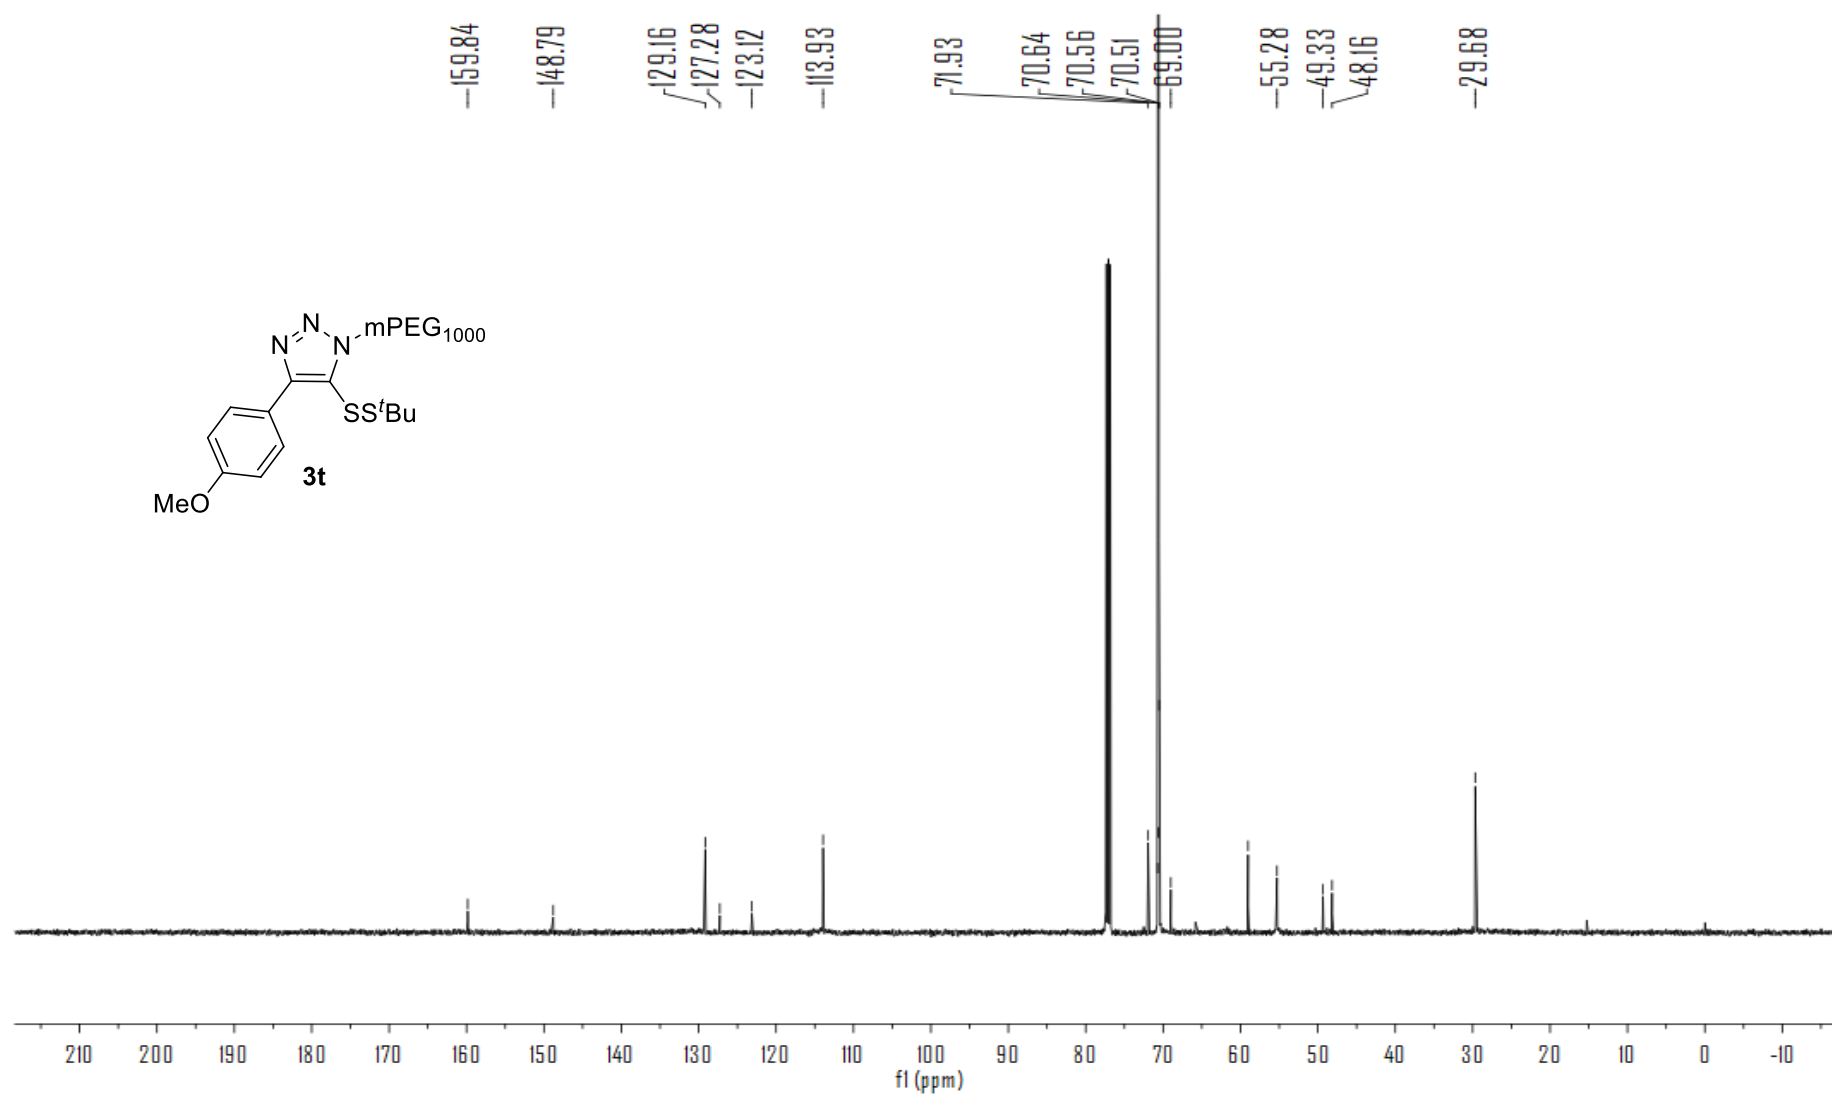

Supplement: d0gc00555j1.pdf [file d0gc00555j1.pdf]
